# Supplementary material for: Pyridofuropyrrolo[1,2-a]pyrimidines and pyridofuropyrimido[1,2-a]azepines: new chemical entities (NCE) with anticonvulsive and psychotropic properties
Source: Royal Society of Chemistry journal article supplement (doi:10.1039/c6ra06507d), 2016-01-01
Supplement: c6ra06507d1.pdf [file c6ra06507d1.pdf]

## Supplementary Data

### Pyridofuopyrrolo[1,2-*a*]pyrimidines and pyridofuopyrimido[1,2-*a*]azepines: New Chemical Entities (NCE) with anticonvulsive and psychotropic properties

Samvel N. Sirakanyan<sup>a,\*</sup>, Athina Geronikaki<sup>b,\*</sup>, Domenico Spinelli<sup>c</sup>, Ruzanna G. Paronikyan<sup>a</sup>, Irina A. Dzhagatspanyan<sup>a</sup>, Ivetta M. Nazaryan<sup>a</sup>, Asmik H. Akopyan<sup>a</sup>, Anush A. Hovakimyan<sup>a</sup>

<sup>a</sup>*Scientific Technological Center of Organic and Pharmaceutical Chemistry of National Academy of Sciences of Republic of Armenia, Institute of Fine Organic Chemistry of A.L.Mnjoyan, Armenia 0014, Yerevan, Ave. Azatutyan 26*

<sup>b</sup>*Aristotle University of Thessaloniki, School of Pharmacy, Thessaloniki 54124, Greece*

<sup>c</sup>*Dipartimento di Chimica G. Ciamician, Alma Mater Studiorum-Università di Bologna, Via F. Selmi 2, Bologna 40126, Italy*

\*Corresponding authors. Email addresses: [geronik@pharm.auth.gr](mailto:geronik@pharm.auth.gr), [shnnr@mail.ru](mailto:shnnr@mail.ru)

### Table of Contents

|                                                                                             |      |
|---------------------------------------------------------------------------------------------|------|
| <b>Table S1.</b> Spectroscopic data for compounds <b>2b, g, h</b> and <b>3b, g, h</b> ..... | p S2 |
| <b>Table S2.</b> Spectroscopic data for compounds <b>4a–h</b> .....                         | p S2 |
| <b>Table S3.</b> Spectroscopic data for compounds <b>5a–h</b> .....                         | p S3 |

**Table S1.** Spectroscopic data for compounds **2b**, **g**, **h** and **3b**, **g**, **h**.

---

*Ethyl [(1-butyl-4-cyano-6,7-dihydro-5H-cyclopenta[c]pyridin-3-yl)oxy]acetate (2b).* <sup>1</sup>H NMR (300 MHz, DMSO/CCl<sub>4</sub>, 1/3) δ 0.93 (t, *J* = 7.3 Hz, 3H, CH<sub>2</sub>CH<sub>3</sub>), 1.28 (t, *J* = 7.1 Hz, 3H, OCH<sub>2</sub>CH<sub>3</sub>), 1.27–1.39 (m, 2H, CH<sub>2</sub>CH<sub>3</sub>), 1.56–1.67 (m, 2H, CH<sub>2</sub>C<sub>2</sub>H<sub>5</sub>), 2.13–2.24 (m, 2H, 6-CH<sub>2</sub>), 2.60 (t, *J* = 7.4 Hz, 2H, CH<sub>2</sub>C<sub>3</sub>H<sub>7</sub>), 2.86 (t, *J* = 7.5 Hz, 2H, 7-CH<sub>2</sub>), 3.06 (t, *J* = 7.6 Hz, 2H, 5-CH<sub>2</sub>), 4.17 (q, *J* = 7.1 Hz, 2H, OCH<sub>2</sub>CH<sub>3</sub>), 4.89 (s, 2H, OCH<sub>2</sub>CO).

*Ethyl [(5-cyano-3,3-dimethyl-8-ethyl-3,4-dihydro-1H-pyrano[3,4-c]pyridin-6-yl)oxy] acetate (2g).* <sup>1</sup>H NMR (300 MHz, DMSO/CCl<sub>4</sub>, 1/3) δ 1.21 (t, *J* = 7.4 Hz, 3H, CH<sub>2</sub>CH<sub>3</sub>), 1.26 (s, 6H, C(CH<sub>3</sub>)<sub>2</sub>), 1.30 (t, *J* = 7.1 Hz, 3H, OCH<sub>2</sub>CH<sub>3</sub>), 2.58 (q, *J* = 7.4 Hz, 2H, CH<sub>2</sub>CH<sub>3</sub>), 2.78 (s, 2H, CH<sub>2</sub>), 4.18 (q, *J* = 7.1 Hz, 2H, OCH<sub>2</sub>CH<sub>3</sub>), 4.61 (s, 2H, OCH<sub>2</sub>), 4.92 (s, 2H, OCH<sub>2</sub>CO).

*Ethyl [(8-butyl-5-cyano-3,3-dimethyl-3,4-dihydro-1H-pyrano[3,4-c]pyridin-6-yl)oxy] acetate (2h).* <sup>1</sup>H NMR (300 MHz, DMSO/CCl<sub>4</sub>, 1/3) δ 0.93 (t, *J* = 7.3 Hz, 3H, CH<sub>2</sub>CH<sub>3</sub>), 1.27 (s, 6H, C(CH<sub>3</sub>)<sub>2</sub>), 1.27 (t, *J* = 7.1 Hz, 3H, OCH<sub>2</sub>CH<sub>3</sub>), 1.30–1.41 (m, 2H, CH<sub>2</sub>CH<sub>3</sub>), 1.57–1.68 (m, 2H, CH<sub>2</sub>C<sub>2</sub>H<sub>5</sub>), 2.50–2.55 (m, 2H, CH<sub>2</sub>C<sub>3</sub>H<sub>7</sub>), 2.78 (s, 2H, CH<sub>2</sub>), 4.17 (q, *J* = 7.1 Hz, 2H, OCH<sub>2</sub>CH<sub>3</sub>), 4.62 (s, 2H, OCH<sub>2</sub>), 4.91 (s, 2H, OCH<sub>2</sub>CO).

*Ethyl 1-amino-5-butyl-7,8-dihydro-6H-cyclopenta[d]furo[2,3-b]pyridine-2-carboxylate (3b).* <sup>1</sup>H NMR (300 MHz, DMSO/CCl<sub>4</sub>, 1/3) δ 0.95 (t, *J* = 7.3 Hz, 3H, CH<sub>2</sub>CH<sub>3</sub>), 1.32–1.45 (m, 2H, CH<sub>2</sub>CH<sub>3</sub>), 1.40 (t, *J* = 7.1 Hz, 3H, OCH<sub>2</sub>CH<sub>3</sub>), 1.63–1.75 (m, 2H, CH<sub>2</sub>C<sub>2</sub>H<sub>5</sub>), 2.15–2.27 (m, 2H, 7-CH<sub>2</sub>), 2.68–2.74 (m, 2H, CH<sub>2</sub>C<sub>3</sub>H<sub>7</sub>), 2.89 (t, *J* = 7.5 Hz, 2H, 6-CH<sub>2</sub>), 3.27 (t, *J* = 7.6 Hz, 2H, 8-CH<sub>2</sub>), 4.32 (q, *J* = 7.1 Hz, 2H, OCH<sub>2</sub>CH<sub>3</sub>), 5.70 (br s, 2H, NH<sub>2</sub>).

*Ethyl 1-amino-8,8-dimethyl-5-ethyl-8,9-dihydro-6H-furo[2,3-b]pyrano[4,3-d]pyridine-2-carboxylate (3g).* <sup>1</sup>H NMR (300 MHz, DMSO/CCl<sub>4</sub>, 1/3) δ 1.29 (t, *J* = 7.4 Hz, 3H, CH<sub>2</sub>CH<sub>3</sub>), 1.30 (s, 6H, C(CH<sub>3</sub>)<sub>2</sub>), 1.41 (t, *J* = 7.1 Hz, 3H, OCH<sub>2</sub>CH<sub>3</sub>), 2.65 (q, *J* = 7.4 Hz, 2H, CH<sub>2</sub>CH<sub>3</sub>), 3.11 (s, 2H, CH<sub>2</sub>), 4.33 (q, *J* = 7.1 Hz, 2H, OCH<sub>2</sub>CH<sub>3</sub>), 4.71 (s, 2H, OCH<sub>2</sub>), 5.74 (br s, 2H, NH<sub>2</sub>).

*Ethyl 1-amino-8,8-dimethyl-5-butyl-8,9-dihydro-6H-furo[2,3-b]pyrano[4,3-d]pyridine-2-carboxylate (3h).* <sup>1</sup>H NMR (300 MHz, DMSO/CCl<sub>4</sub>, 1/3) δ 0.97 (t, *J* = 7.3 Hz, 3H, CH<sub>2</sub>CH<sub>3</sub>), 1.29 (s, 6H, C(CH<sub>3</sub>)<sub>2</sub>), 1.35–1.48 (m, 2H, CH<sub>2</sub>CH<sub>3</sub>), 1.40 (t, *J* = 7.1 Hz, 3H, OCH<sub>2</sub>CH<sub>3</sub>), 1.65–1.76 (m, 2H, CH<sub>2</sub>C<sub>2</sub>H<sub>5</sub>), 2.61 (t, *J* = 7.5 Hz, 2H, CH<sub>2</sub>C<sub>3</sub>H<sub>7</sub>), 3.11 (s, 2H, CH<sub>2</sub>), 4.33 (q, *J* = 7.1 Hz, 2H, OCH<sub>2</sub>CH<sub>3</sub>), 4.71 (s, 2H, OCH<sub>2</sub>), 5.75 (br s, 2H, NH<sub>2</sub>).

---

**Table S2.** Spectroscopic data for compounds **4a–h**.

---

*4-Isopropyl-2,3,10,11-tetrahydro-1H-cyclopenta[4',5']pyrido[3',2':4,5]furo[3,2-d]pyrrolo[1,2-a]pyrimidin-7(9H)-one (4a).* <sup>1</sup>H NMR (300 MHz, DMSO/CCl<sub>4</sub>, 1/3) δ 1.31 (d, *J* = 6.6 Hz, 6H, CH(CH<sub>3</sub>)<sub>2</sub>), 2.20–2.41 (m, 4H, 2-CH<sub>2</sub>, 10-CH<sub>2</sub>), 3.02 (t, *J* = 7.4 Hz, 2H, 3-CH<sub>2</sub>), 3.19 (t, *J* = 7.8 Hz, 2H, 11-CH<sub>2</sub>), 3.20 (sp, *J* = 6.7 Hz, 1H, CH(CH<sub>3</sub>)<sub>2</sub>), 3.35 (t, *J* = 7.6 Hz, 2H, 1-CH<sub>2</sub>), 4.18–4.24 (m, 2H, 9-CH<sub>2</sub>). <sup>13</sup>C NMR (75 MHz, DMSO/CCl<sub>4</sub>, 1/3) δ: 19.6, 21.0, 24.5, 29.1, 31.1, 31.6, 32.8, 46.5, 109.2, 133.2, 135.5, 142.6, 149.6, 150.8, 160.7, 161.4, 161.8.

*4-Butyl-2,3,10,11-tetrahydro-1H-cyclopenta[4',5']pyrido[3',2':4,5]furo[3,2-d]pyrrolo[1,2-a]pyrimidin-7(9H)-one (4b).* <sup>1</sup>H NMR (300 MHz, DMSO/CCl<sub>4</sub>, 1/3) δ 0.98 (t, *J* = 7.3 Hz, 3H, CH<sub>2</sub>CH<sub>3</sub>), 1.37–1.50 (m, 2H, CH<sub>2</sub>CH<sub>3</sub>), 1.70–1.80 (m, 2H, CH<sub>2</sub>C<sub>2</sub>H<sub>5</sub>), 2.23–2.41 (m, 4H, 2-CH<sub>2</sub>, 10-CH<sub>2</sub>), 2.80 (t, *J* = 7.5 Hz, 2H, CH<sub>2</sub>C<sub>3</sub>H<sub>7</sub>), 2.99 (t, *J* = 7.4 Hz, 2H, 3-CH<sub>2</sub>), 3.19 (t, *J* = 7.9 Hz, 2H, 11-CH<sub>2</sub>), 3.34 (t, *J* = 7.6 Hz, 2H, 1-CH<sub>2</sub>), 4.18–4.24 (m, 2H, 9-CH<sub>2</sub>). <sup>13</sup>C NMR (75 MHz, DMSO/CCl<sub>4</sub>, 1/3) δ: 13.5, 19.6, 21.9, 24.4, 29.3, 29.8, 31.1, 31.6, 34.9, 46.5, 109.1, 134.1, 135.4, 142.5, 149.3, 150.8, 156.9, 160.6, 161.6.

*5-Isopropyl-1,2,3,4,11,12-hexahydropyrrolo[1'',2'':1',2']pyrimido[4',5':4,5]furo[2,3-c]-isoquinolin-8(10H)-one (4c).* <sup>1</sup>H NMR (300 MHz, DMSO/CCl<sub>4</sub>, 1/3) δ 1.28 (d, *J* = 6.6 Hz, 6H, CH(CH<sub>3</sub>)<sub>2</sub>), 1.83–1.98 (m, 4H, 2,3-CH<sub>2</sub>), 2.29–2.40 (m, 2H, 11-CH<sub>2</sub>), 2.82–2.88 (m, 2H, 4-CH<sub>2</sub>), 3.18 (t, *J* = 7.9 Hz, 2H, 12-CH<sub>2</sub>), 3.30–3.38 (m, 3H, 1-CH<sub>2</sub>, CH(CH<sub>3</sub>)<sub>2</sub>), 4.17–4.23 (m, 2H, 10-CH<sub>2</sub>). <sup>13</sup>C NMR (75 MHz, DMSO/CCl<sub>4</sub>, 1/3) δ: 19.5, 20.8, 21.3, 22.4, 24.7, 26.5, 30.4, 31.7, 46.4, 109.9, 125.1, 135.1, 143.5, 143.9, 150.8, 160.2, 160.3, 164.9.

---

**5-Isobutyl-1,2,3,4,11,12-hexahydropyrrolo[1'',2'':1',2']pyrimido[4',5':4,5]furo[2,3-c]isoquinolin-8(10H)-one (4d).** <sup>1</sup>H NMR (300 MHz, DMSO/CCl<sub>4</sub>, 1/3) δ 1.00 (d, *J* = 6.6 Hz, 6H, CH(CH<sub>3</sub>)<sub>2</sub>), 1.83–1.97 (m, 4H, 2,3-CH<sub>2</sub>), 2.21–2.40 (m, 3H, CH(CH<sub>3</sub>)<sub>2</sub>, 11-CH<sub>2</sub>), 2.68 (d, *J* = 7.0 Hz, 2H, CHCH<sub>2</sub>), 2.76–2.82 (m, 2H, 4-CH<sub>2</sub>), 3.18 (t, *J* = 7.9 Hz, 2H, 12-CH<sub>2</sub>), 3.31–3.37 (m, 2H, 1-CH<sub>2</sub>), 4.17–4.23 (m, 2H, 10-CH<sub>2</sub>). <sup>13</sup>C NMR (75 MHz, DMSO/CCl<sub>4</sub>, 1/3) δ: 19.6, 20.8, 22.2, 22.3, 25.2, 26.4, 27.1, 31.7, 42.9, 46.4, 109.9, 126.4, 135.0, 143.4, 143.6, 150.8, 159.7, 159.9, 160.3.

**2,2,5-Trimethyl-1,4,11,12-tetrahydro-2H-pyrano[4'',3'':4',5']pyrido[3',2':4,5]furo[3,2-d]pyrrolo[1,2-a]pyrimidin-8(10H)-one (4e).** <sup>1</sup>H NMR (300 MHz, DMSO/CCl<sub>4</sub>, 1/3) δ 1.33 (s, 6H, C(CH<sub>3</sub>)<sub>2</sub>), 2.30–2.41 (m, 2H, 11-CH<sub>2</sub>), 2.48 (s, 3H, CH<sub>3</sub>), 3.19 (s, 2H, CH<sub>2</sub>), 3.20 (t, *J* = 7.9 Hz, 2H, 12-CH<sub>2</sub>), 4.20 (t, *J* = 7.3 Hz, 2H, 10-CH<sub>2</sub>), 4.74 (s, 2H, OCH<sub>2</sub>). <sup>13</sup>C NMR (75 MHz, DMSO/CCl<sub>4</sub>, 1/3) δ: 19.6, 20.8, 25.8, 31.7, 36.3, 46.5, 60.0, 68.6, 110.1, 123.7, 135.1, 139.6, 143.0, 150.7, 153.5, 160.3, 160.7.

**2,2-Dimethyl-5-ethyl-1,4,11,12-tetrahydro-2H-pyrano[4'',3'':4',5']pyrido[3',2':4,5]furo[3,2-d]pyrrolo[1,2-a]pyrimidin-8(10H)-one (4f).** <sup>1</sup>H NMR (300 MHz, DMSO/CCl<sub>4</sub>, 1/3) δ 1.33 (s, 6H, C(CH<sub>3</sub>)<sub>2</sub>), 1.35 (t, *J* = 7.3 Hz, 3H, CH<sub>2</sub>CH<sub>3</sub>), 2.30–2.41 (m, 2H, 11-CH<sub>2</sub>), 2.74 (t, *J* = 7.3 Hz, 2H, CH<sub>2</sub>CH<sub>3</sub>), 3.20 (t, *J* = 7.9 Hz, 2H, 12-CH<sub>2</sub>), 3.22 (s, 2H, CH<sub>2</sub>), 4.18–4.24 (t, *J* = 7.3 Hz, 2H, 10-CH<sub>2</sub>), 4.79 (s, 2H, OCH<sub>2</sub>). <sup>13</sup>C NMR (75 MHz, DMSO/CCl<sub>4</sub>, 1/3) δ: 11.3, 19.6, 25.8, 26.4, 31.7, 36.4, 46.5, 59.7, 68.5, 109.9, 123.1, 135.2, 139.7, 143.0, 150.7, 157.9, 160.6, 160.7.

**5-Butyl-2,2-dimethyl-1,4,11,12-tetrahydro-2H-pyrano[4'',3'':4',5']pyrido[3',2':4,5]furo[3,2-d]pyrrolo[1,2-a]pyrimidin-8(10H)-one (4g).** <sup>1</sup>H NMR (300 MHz, DMSO/CCl<sub>4</sub>, 1/3) δ 0.99 (t, *J* = 7.3 Hz, 3H, CH<sub>2</sub>CH<sub>3</sub>), 1.33 (s, 6H, C(CH<sub>3</sub>)<sub>2</sub>), 1.39–1.52 (m, 2H, CH<sub>2</sub>CH<sub>3</sub>), 1.71–1.82 (m, 2H, CH<sub>2</sub>C<sub>2</sub>H<sub>5</sub>), 2.30–2.41 (m, 2H, 11-CH<sub>2</sub>), 2.66–2.73 (m, 2H, CH<sub>2</sub>C<sub>3</sub>H<sub>7</sub>), 3.20 (t, *J* = 7.9 Hz, 2H, 12-CH<sub>2</sub>), 3.22 (s, 2H, CH<sub>2</sub>), 4.18–4.25 (t, *J* = 7.3 Hz, 2H, 10-CH<sub>2</sub>), 4.80 (s, 2H, OCH<sub>2</sub>). <sup>13</sup>C NMR (75 MHz, DMSO/CCl<sub>4</sub>, 1/3) δ: 13.5, 19.6, 21.9, 25.8, 29.4, 31.7, 33.0, 36.5, 46.5, 59.8, 68.6, 110.1, 123.3, 135.2, 139.9, 143.1, 150.7, 157.3, 160.6, 160.7.

**2,2-Dimethyl-5-(2-furyl)-1,4,11,12-tetrahydro-2H-pyrano[4'',3'':4',5']pyrido[3',2':4,5]furo[3,2-d]pyrrolo[1,2-a]pyrimidin-8(10H)-one (4h).** IR ν/cm<sup>-1</sup>: 1687 (C=O). <sup>1</sup>H NMR (300 MHz, DMSO/CCl<sub>4</sub>, 1/3) δ 1.37 (s, 6H, C(CH<sub>3</sub>)<sub>2</sub>), 2.28–2.39 (m, 2H, 11-CH<sub>2</sub>), 3.21 (t, *J* = 7.9 Hz, 2H, 12-CH<sub>2</sub>), 3.30 (s, 2H, CH<sub>2</sub>), 4.17–4.23 (t, *J* = 7.3 Hz, 2H, 10-CH<sub>2</sub>), 5.14 (s, 2H, OCH<sub>2</sub>), 6.67 (dd, *J* = 3.5, 1.7 Hz, 1H, 4-CH, furyl), 7.22 (dd, *J* = 3.5, 0.7 Hz, 1H, 3-CH, furyl), 7.83 (dd, *J* = 1.7, 0.7 Hz, 1H, 5-CH, furyl). <sup>13</sup>C NMR (75 MHz, DMSO/CCl<sub>4</sub>, 1/3) δ: 21.7, 25.8, 31.6, 36.5, 46.5, 60.0, 68.7, 107.8, 109.7, 110.1, 123.8, 135.0, 139.8, 140.9, 144.2, 152.7, 153.5, 155.7, 160.7, 161.9. Anal. Calcd. for C<sub>21</sub>H<sub>19</sub>N<sub>3</sub>O<sub>4</sub>: C 66.83; H 5.07; N 11.13 %. Found: C 66.71; H 5.08; N 11.11 %.

**Table S3.** Spectroscopic data for compounds 5a–h.

**4-Isopropyl-2,3,10,11,12,13-hexahydro-1H-cyclopenta[4'',5']pyrido[3'',2'':4',5']furo[3',2':4,5]pyrimido[1,2-a]azepin-7(9H)-one (5a).** <sup>1</sup>H NMR (300 MHz, DMSO/CCl<sub>4</sub>, 1/3) δ 1.31 (d, *J* = 6.7 Hz, 6H, CH(CH<sub>3</sub>)<sub>2</sub>), 1.76–1.93 (m, 6H, 10,11,12-CH<sub>2</sub>), 2.23–2.34 (m, 2H, 2-CH<sub>2</sub>), 3.02 (t, *J* = 7.4 Hz, 2H, 3-CH<sub>2</sub>), 3.12–3.17 (m, 2H, 13-CH<sub>2</sub>), 3.19 (sp, *J* = 6.7 Hz, 1H, CH(CH<sub>3</sub>)<sub>2</sub>), 3.36 (t, *J* = 7.6 Hz, 2H, 1-CH<sub>2</sub>), 4.41–4.46 (m, 2H, 9-CH<sub>2</sub>). <sup>13</sup>C NMR (75 MHz, DMSO/CCl<sub>4</sub>, 1/3) δ: 20.9, 24.5, 27.1, 28.7, 29.0, 31.1, 32.8, 36.6, 41.9, 109.2, 133.1, 135.1, 140.4, 149.7, 151.8, 160.9, 161.5, 161.8.

**4-Butyl-2,3,10,11,12,13-hexahydro-1H-cyclopenta[4'',5'']pyrido[3'',2'':4',5']furo[3',2':4,5]-pyrimido[1,2-a]azepin-7(9H)-one (5b).** <sup>1</sup>H NMR (300 MHz, DMSO/CCl<sub>4</sub>, 1/3) δ 0.98 (t, *J* = 7.3 Hz, 3H, CH<sub>2</sub>CH<sub>3</sub>), 1.36–1.49 (m, 2H, CH<sub>2</sub>CH<sub>3</sub>), 1.69–1.93 (m, 8H, CH<sub>2</sub>C<sub>2</sub>H<sub>5</sub>, 10,11,12-CH<sub>2</sub>), 2.23–2.33 (m, 2H, 2-CH<sub>2</sub>), 2.80 (t, *J* = 7.6 Hz, 2H, CH<sub>2</sub>C<sub>3</sub>H<sub>7</sub>), 2.99 (t, *J* = 7.4 Hz, 2H, 3-CH<sub>2</sub>), 3.11–3.16 (m, 2H, 13-CH<sub>2</sub>), 3.34 (t, *J* = 7.6 Hz, 2H, 1-CH<sub>2</sub>), 4.40–4.45 (m, 2H, 9-CH<sub>2</sub>). <sup>13</sup>C NMR (75 MHz, DMSO/CCl<sub>4</sub>, 1/3) δ: 13.5, 21.9, 24.4, 24.5, 27.1, 28.7, 29.2, 29.7, 31.1, 34.9, 36.6, 41.9, 109.2, 134.1, 134.9, 140.4, 149.4, 151.8, 156.9, 160.9, 161.6.

**4-Phenyl-2,3,10,11,12,13-hexahydro-1H-cyclopenta[4'',5'']pyrido[3'',2'':4',5']furo[3',2':4,5]pyrimido[1,2-a]azepin-7(9H)-one (5c).** <sup>1</sup>H NMR (300 MHz, DMSO/CCl<sub>4</sub>, 1/3) δ 1.78–1.95 (m, 6H, CH<sub>2</sub>, 10,11,12-CH<sub>2</sub>), 2.23–2.35 (m, 2H, 2-CH<sub>2</sub>), 3.13–3.20 (m, 2H, 13-CH<sub>2</sub>), 3.24 (t, *J* = 7.3 Hz, 2H, 3-CH<sub>2</sub>), 3.43 (t, *J* = 7.5 Hz, 2H, 1-CH<sub>2</sub>), 4.41–4.49 (m, 2H, NCH<sub>2</sub>), 7.38–7.51 and 7.83–7.88 (both m, 3H and 2H, Ph). <sup>13</sup>C NMR (75 MHz, DMSO/CCl<sub>4</sub>, 1/3) δ: 24.4, 25.7, 26.9, 28.6, 31.2, 31.8, 36.6, 42.1, 110.2, 127.9, 128.4, 128.5, 134.2, 135.9, 138.6, 140.3, 151.8, 152.0, 152.3, 161.5, 161.8.

**5-Isopropyl-1,2,3,4,11,12,13,14-octahydroazepino[1'',2'':1',2']pyrimido[4',5':4,5]furo[2,3-c]isoquinolin-8(10H)-one (5d).** <sup>1</sup>H NMR (300 MHz, DMSO/CCl<sub>4</sub>, 1/3) δ 1.28 (d, *J* = 6.7 Hz, 6H, CH(CH<sub>3</sub>)<sub>2</sub>), 1.75–1.98 (m, 10H, 2,3-CH<sub>2</sub> and 11,12,13-CH<sub>2</sub>), 2.82–2.88 (m, 2H, 4-CH<sub>2</sub>), 3.11–3.16 (m, 2H, 14-CH<sub>2</sub>), 3.33 (sp, *J* = 6.7 Hz, 1H, CH(CH<sub>3</sub>)<sub>2</sub>), 3.32–3.38 (m, 2H, 1-CH<sub>2</sub>), 4.40–4.45 (m, 2H, 10-CH<sub>2</sub>). <sup>13</sup>C NMR (75 MHz, DMSO/CCl<sub>4</sub>, 1/3) δ: 20.7, 21.3, 22.4, 24.5, 24.7, 26.5, 27.1, 28.7, 30.4, 36.7, 41.8, 109.9, 124.9, 134.6, 141.3, 144.0, 151.7, 160.3, 160.6, 164.9.

**5-Isobutyl-1,2,3,4,11,12,13,14-octahydroazepino[1'',2'':1',2']pyrimido[4',5':4,5]furo[2,3-c]isoquinolin-8(10H)-one (5e).** <sup>1</sup>H NMR (300 MHz, DMSO/CCl<sub>4</sub>, 1/3) δ 0.99 (d, *J* = 6.6 Hz, 6H, CH(CH<sub>3</sub>)<sub>2</sub>), 1.75–1.97 (m, 10H, 2,3-CH<sub>2</sub> and 11,12,13-CH<sub>2</sub>), 2.21–2.34 (m, 1H, CH(CH<sub>3</sub>)<sub>2</sub>), 2.68 (d, *J* = 7.0 Hz, 2H, CHCH<sub>2</sub>), 2.76–2.82 (m, 2H, 4-CH<sub>2</sub>), 3.11–3.17 (m, 2H, 14-CH<sub>2</sub>), 3.32–3.38 (m, 2H, 1-CH<sub>2</sub>), 4.40–4.45 (m, 2H, 10-CH<sub>2</sub>). <sup>13</sup>C NMR (75 MHz, DMSO/CCl<sub>4</sub>, 1/3) δ: 20.8, 22.2, 22.4, 24.5, 25.2, 26.3, 27.1, 28.7, 36.7, 41.8, 42.9, 109.9, 126.4, 134.6, 141.3, 143.8, 151.8, 159.8, 159.9, 160.6.

**2,2,5-Trimethyl-1,4,11,12,13,14-hexahydro-2H-pyrano[4''',3''':4'',5'']pyrido[3'',2'':4',5']furo[3',2':4,5]pyrimido[1,2-a]azepin-8(10H)-one (5f).** <sup>1</sup>H NMR (300 MHz, DMSO/CCl<sub>4</sub>, 1/3) δ 1.34 (s, 6H, C(CH<sub>3</sub>)<sub>2</sub>), 1.76–1.94 (m, 6H, 11,12,13-CH<sub>2</sub>), 2.49 (s, 3H, CH<sub>3</sub>), 3.14–3.20 (m, 2H, 14-CH<sub>2</sub>), 3.22 (s, 2H, CH<sub>2</sub>), 4.41–4.46 (m, 2H, 10-CH<sub>2</sub>), 4.75 (s, 2H, OCH<sub>2</sub>). <sup>13</sup>C NMR (75 MHz, DMSO/CCl<sub>4</sub>, 1/3) δ: 20.8, 24.5, 25.8, 27.0, 28.7, 36.3, 36.6, 41.9, 60.0, 68.6, 110.2, 123.7, 134.7, 139.7, 140.8, 151.7, 153.6, 160.4, 161.0.

**2,2-Dimethyl-5-ethyl-1,4,11,12,13,14-hexahydro-2H-pyrano[4''',3''':4'',5'']pyrido[3'',2'':4',5']furo[3',2':4,5]pyrimido[1,2-a]azepin-8(10H)-one (5g).** <sup>1</sup>H NMR (300 MHz, DMSO/CCl<sub>4</sub>, 1/3) δ 1.34 (s, 6H, C(CH<sub>3</sub>)<sub>2</sub>), 1.35 (t, *J* = 7.4 Hz, 3H, CH<sub>2</sub>CH<sub>3</sub>), 1.76–1.94 (m, 6H, 11,12,13-CH<sub>2</sub>), 2.74 (q, *J* = 7.4 Hz, 2H, CH<sub>2</sub>CH<sub>3</sub>), 3.14–3.20 (m, 2H, 14-CH<sub>2</sub>), 3.23 (s, 2H, CH<sub>2</sub>), 4.41–4.47 (m, 2H, 10-CH<sub>2</sub>), 4.80 (s, 2H, OCH<sub>2</sub>). <sup>13</sup>C NMR (75 MHz, DMSO/CCl<sub>4</sub>, 1/3) δ: 11.3, 24.5, 25.8, 26.4, 27.1, 28.7, 36.4, 36.6, 41.9, 59.7, 68.6, 110.1, 123.1, 134.8, 139.8, 140.9, 151.7, 158.0, 160.7, 161.0.

**5-Butyl-2,2-dimethyl-1,4,11,12,13,14-hexahydro-2H-pyrano[4''',3''':4'',5'']pyrido[3'',2'':4',5']furo[3',2':4,5]pyrimido[1,2-a]azepin-8(10H)-one (5h).** <sup>1</sup>H NMR (300 MHz, DMSO/CCl<sub>4</sub>, 1/3) δ 0.99 (t, *J* = 7.3 Hz, 3H, CH<sub>2</sub>CH<sub>3</sub>), 1.33 (s, 6H, C(CH<sub>3</sub>)<sub>2</sub>), 1.38–1.51 (m, 2H, CH<sub>2</sub>CH<sub>3</sub>), 1.71–1.94 (m, 8H, CH<sub>2</sub>C<sub>2</sub>H<sub>5</sub>, 11,12,13-CH<sub>2</sub>), 2.69 (t, *J* = 7.6 Hz, 2H, CH<sub>2</sub>C<sub>3</sub>H<sub>7</sub>), 3.13–3.20 (m, 2H, 14-CH<sub>2</sub>), 3.23 (s, 2H, CH<sub>2</sub>), 4.40–4.47 (m, 2H, 10-CH<sub>2</sub>), 4.80 (s, 2H, OCH<sub>2</sub>). <sup>13</sup>C NMR (75 MHz, DMSO/CCl<sub>4</sub>, 1/3) δ: 13.5, 21.9, 24.5, 25.8, 27.1, 28.7, 29.4, 32.9, 36.5, 36.6, 41.9, 59.8, 68.6, 110.2, 123.3, 134.8, 139.9, 140.9, 151.8, 157.3, 160.7, 161.0.



2b

Molecular Structure Research Centre, Yerevan, Armenia, Varian Mercury-300VX

H1 300.077 MHz, nt = 16, np = 16000, temp = 30.0 C, lb = -0.2, solvent = DMSO/CDCl4 1/3

SAMV\_16 ha-463

Feb 29 2016

HA-463

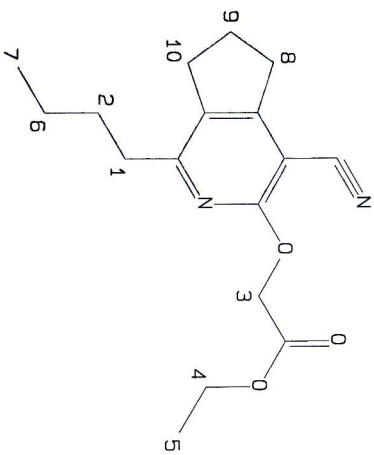

C<sub>17</sub>H<sub>22</sub>N<sub>2</sub>O<sub>3</sub>

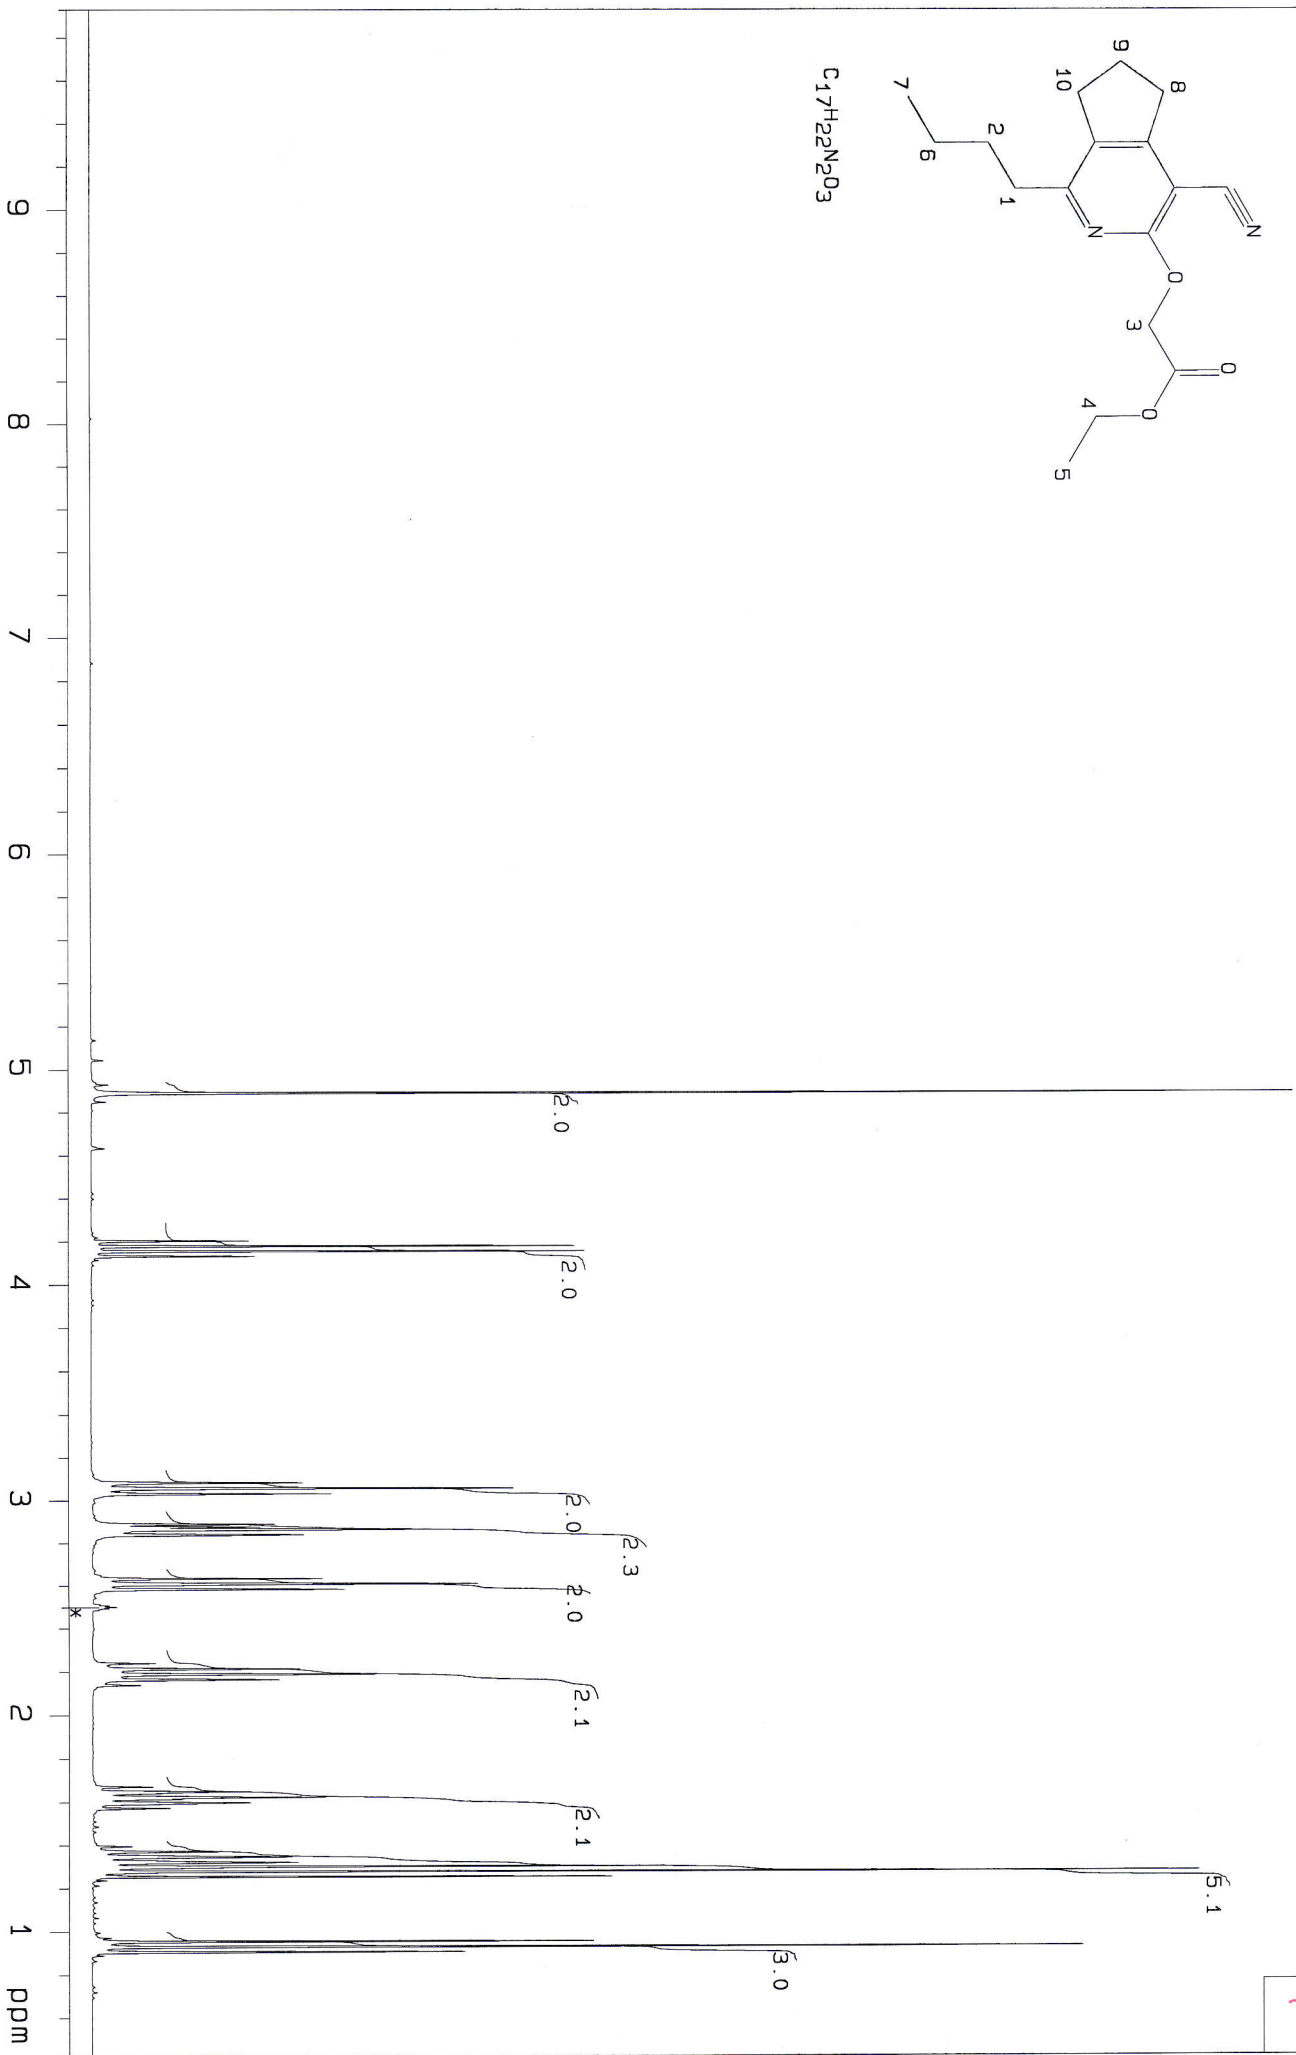

4

29

HA-137 Molecular Structure Research Centre, Yerevan, Armenia, Varian Mercury-300VX

H1 300.077 MHz, nt = 16, np = 16000, temp = 30.0 C, lb = -0.2, solvent = DMSO/CD4 1/3 SAMV\_16 ha-137

Feb 29 2016

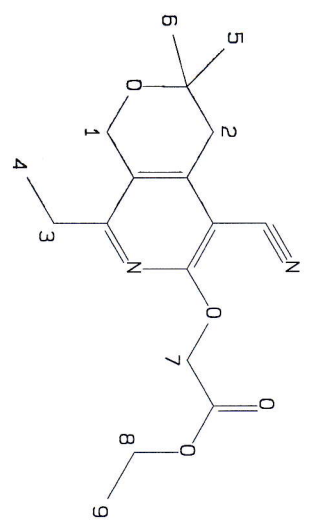

C<sub>17</sub>H<sub>22</sub>N<sub>2</sub>O<sub>4</sub>

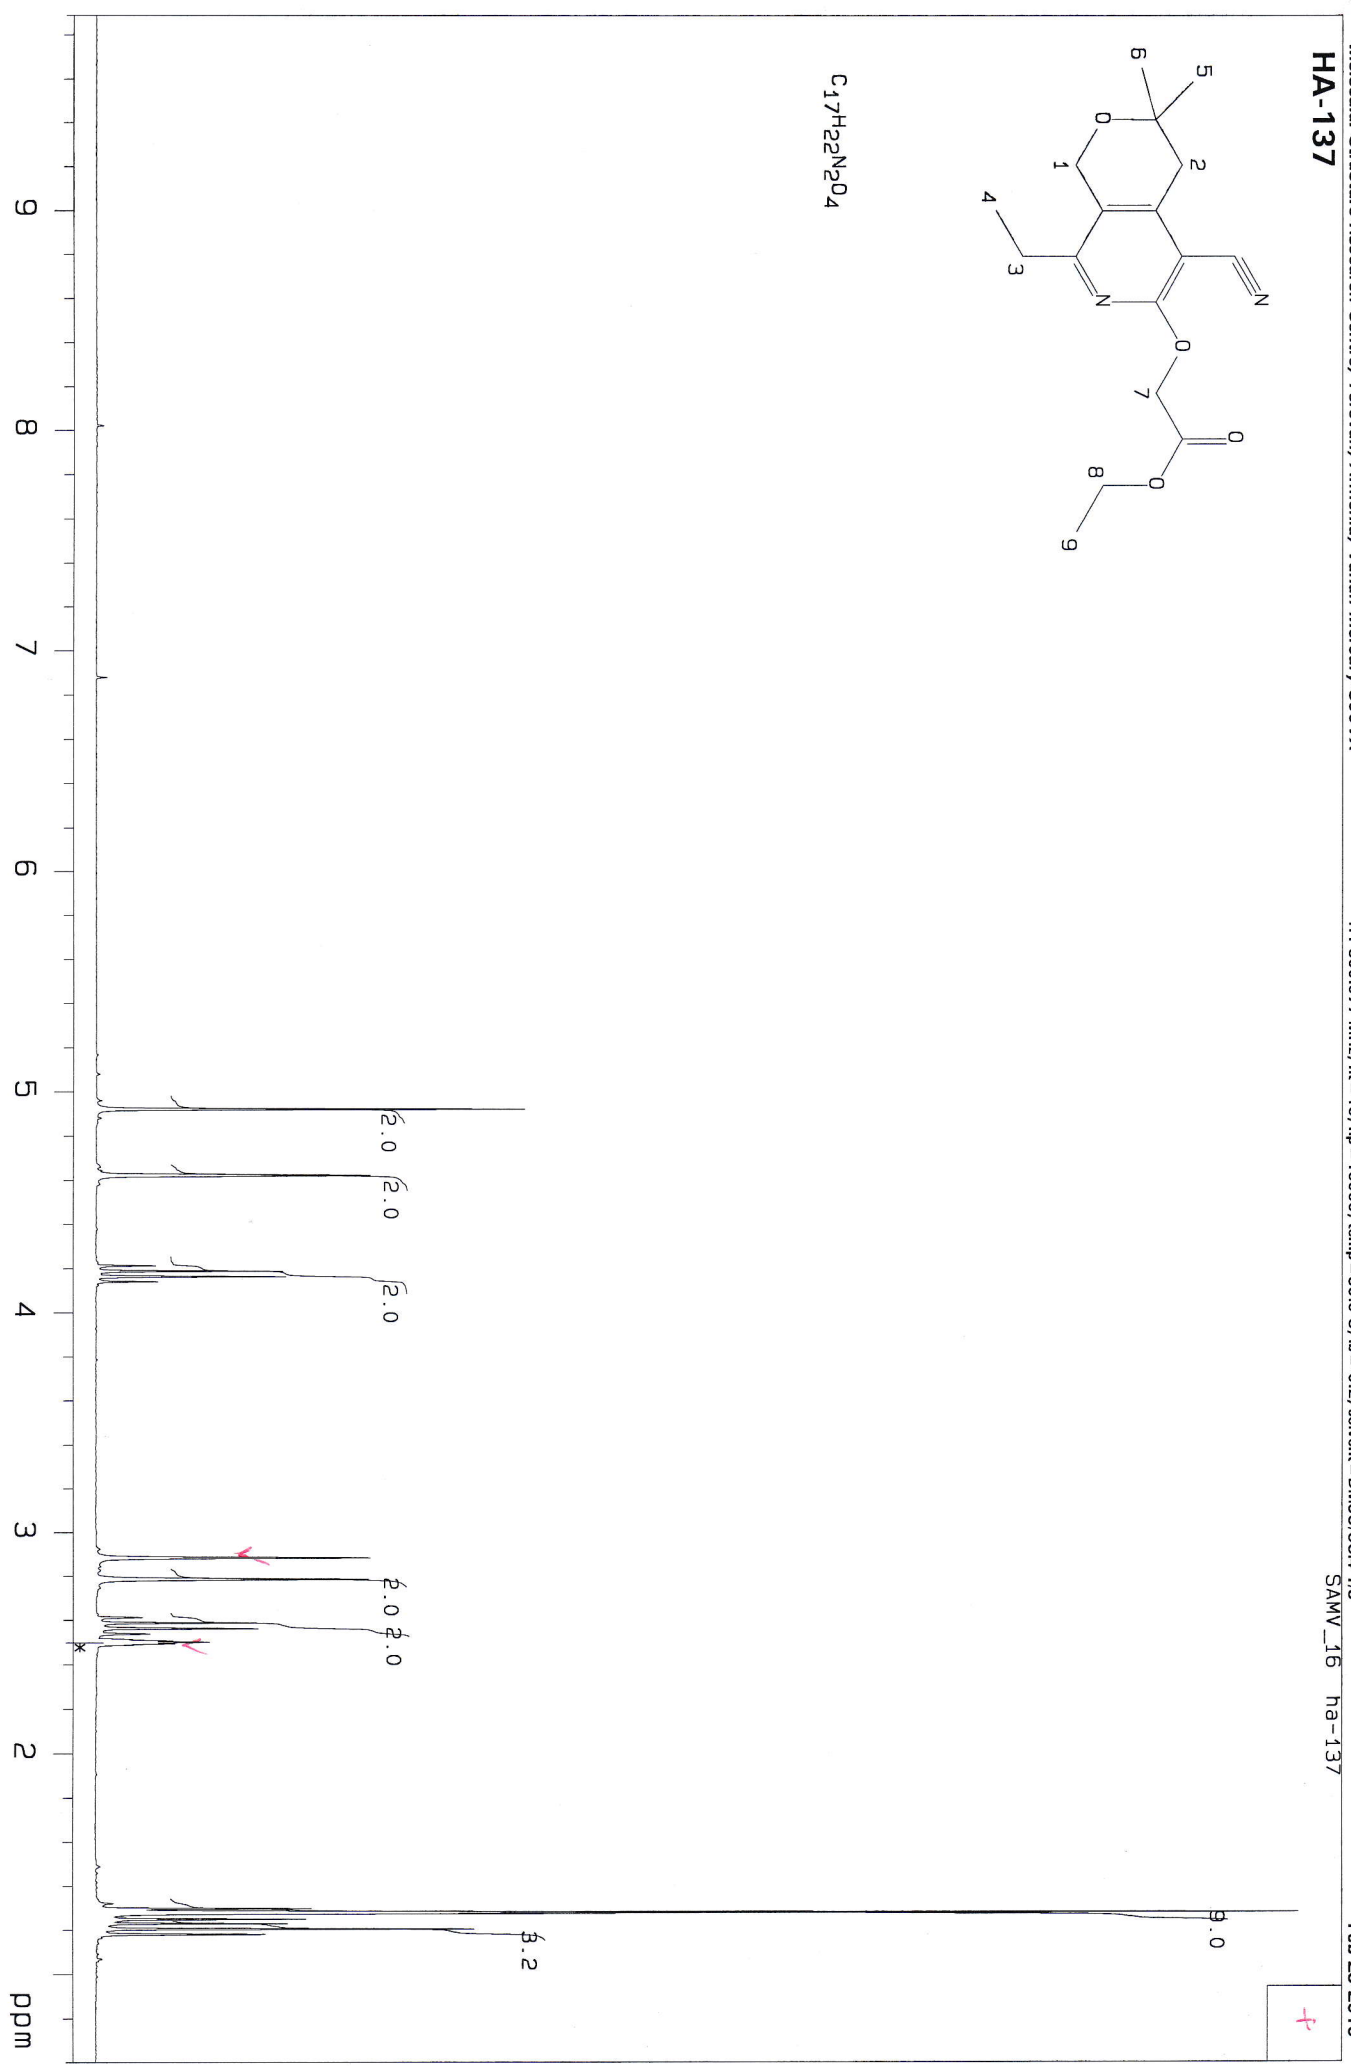

*Handwritten signature*

226

HA-378

SAMV\_11 ha-378

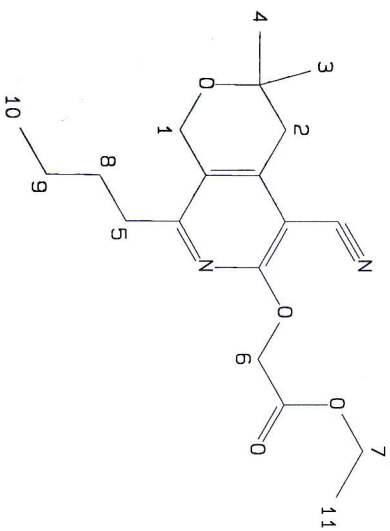

C<sub>19</sub>H<sub>26</sub>N<sub>2</sub>O<sub>4</sub>

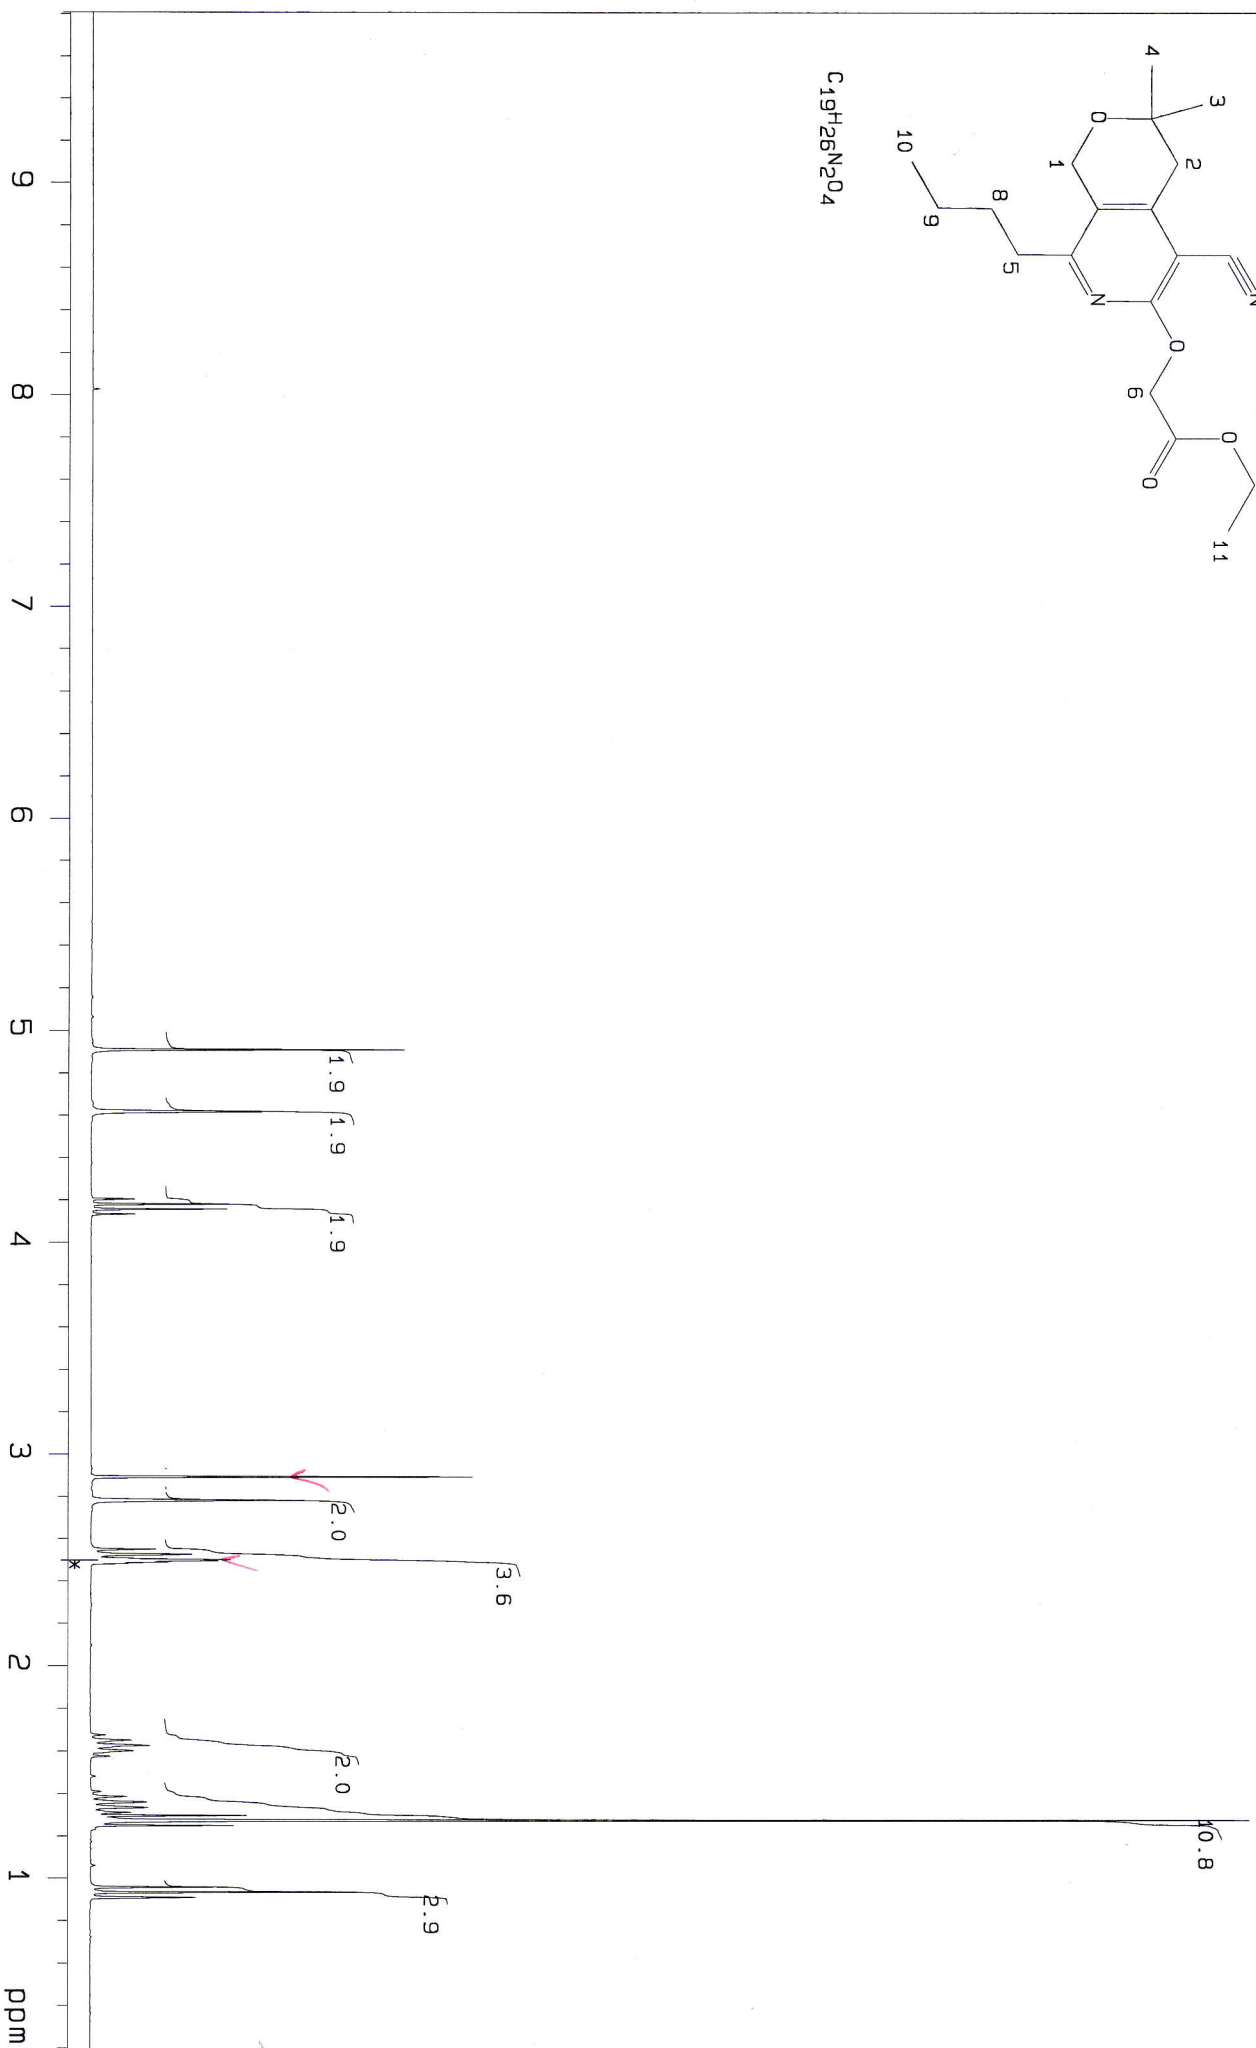

36

Molecular Structure Research Centre, Yerevan, Armenia, Varian Mercury-300VX

H1 300.077 MHz, n1 = 16, np = 16000, temp = 30.0 C, lb = -0.2, solvent = DMSO/C04 1/3

SAMV\_11 na-457

Oct 31 2011

HA-457

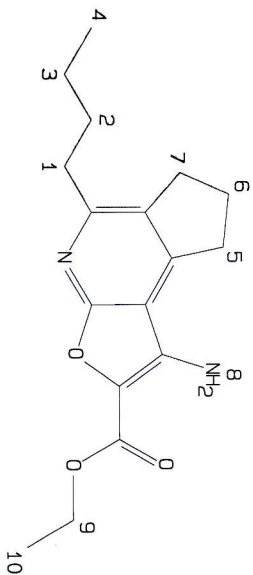

C<sub>17</sub>H<sub>22</sub>N<sub>2</sub>O<sub>3</sub>

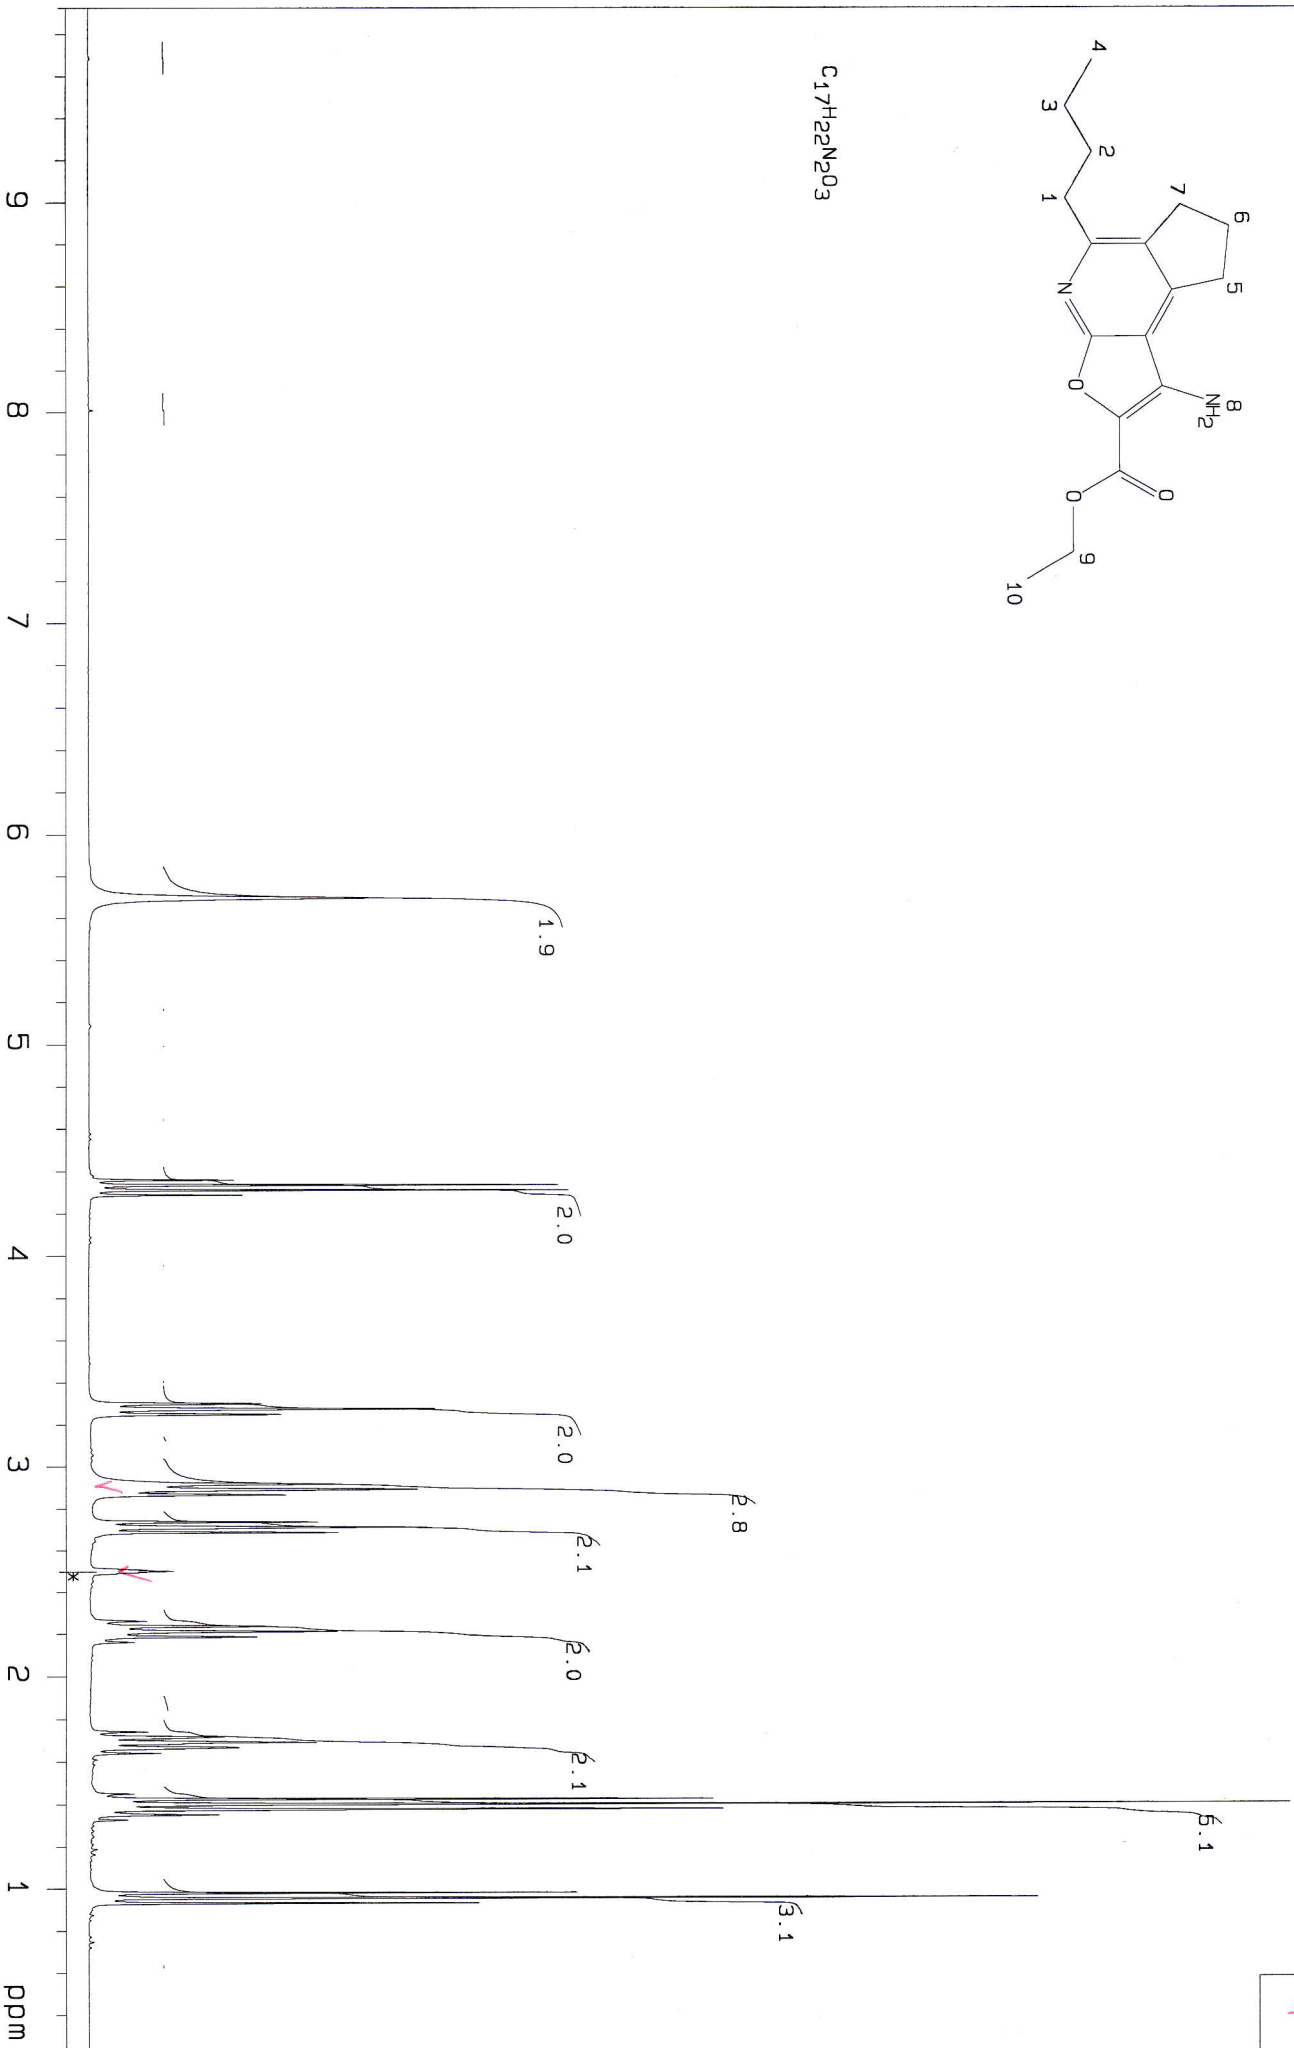

+

38

Molecular Structure Research Centre, Yerevan, Armenia, Varian Mercury-300VX

H1 300.077 MHz, nt = 16, np = 16000, temp = 30.0 C, lb = -0.2, solvent = DMSO-CD4 1/3

SAMV\_13 ha-138

May 2 2013

HA-138

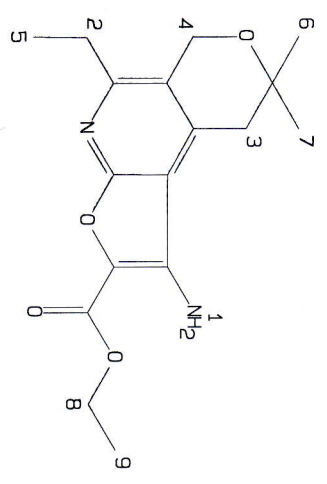

C<sub>17</sub>H<sub>22</sub>N<sub>2</sub>O<sub>4</sub>

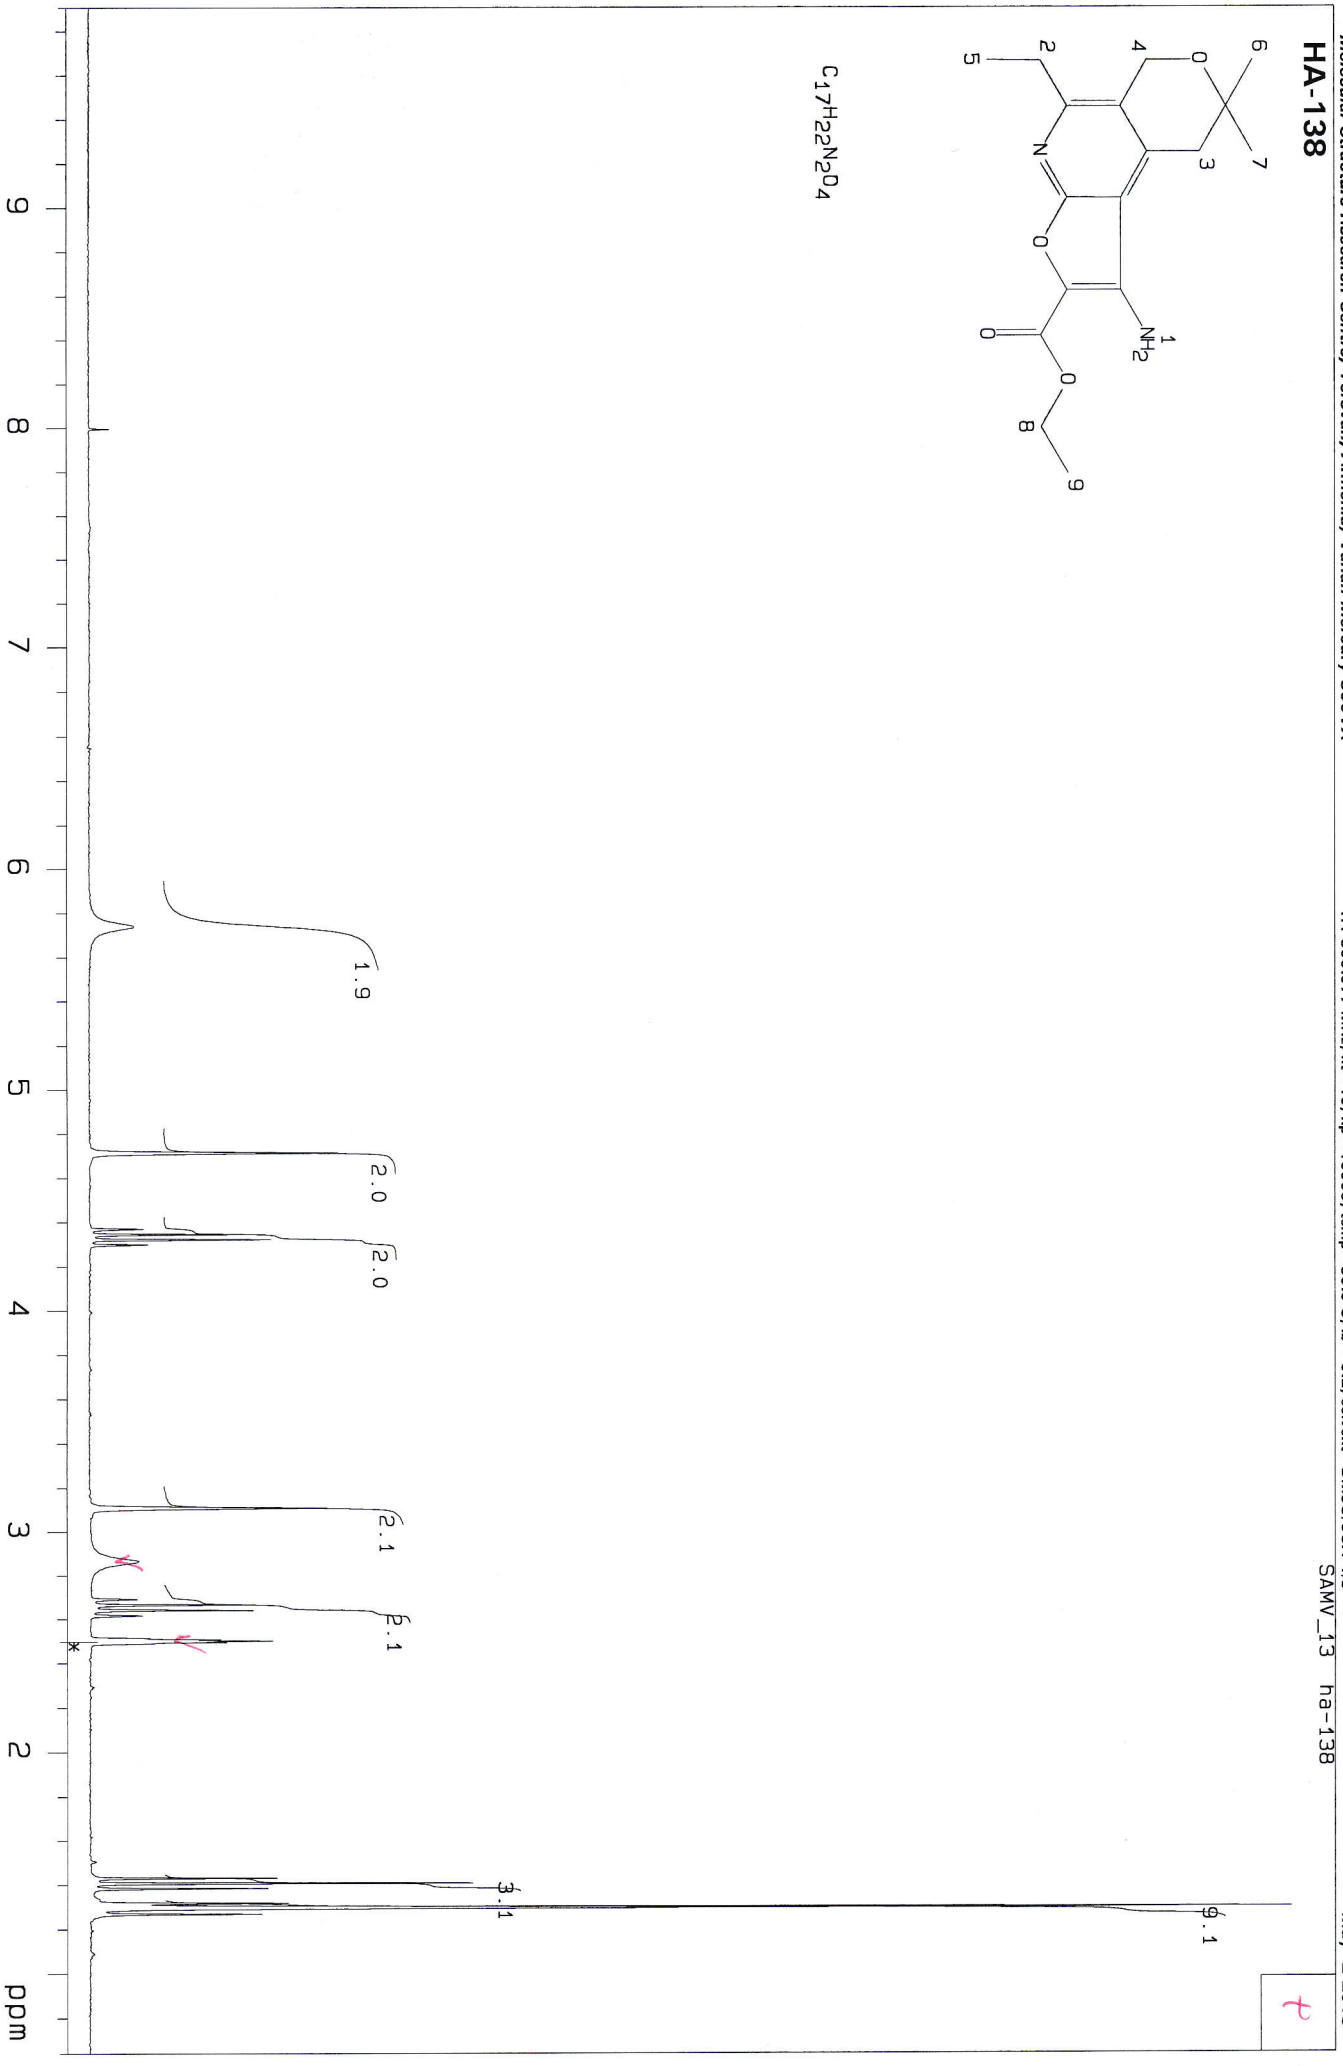

P



4a

4a

Molecular Structure Research Centre, Yerevan, Armenia, Varian Mercury-300VX

H1 300.077 MHz, nt = 16, np = 16000, temp = 30.0 C, lb = -0.2, solvent = DMSO/Cd4 1/3

SAMV\_16 ha-317

Feb 29 2016

HA-317

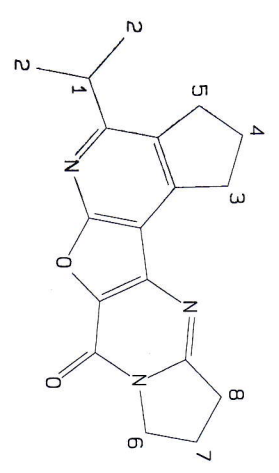

C<sub>18</sub>H<sub>19</sub>N<sub>3</sub>O<sub>2</sub>

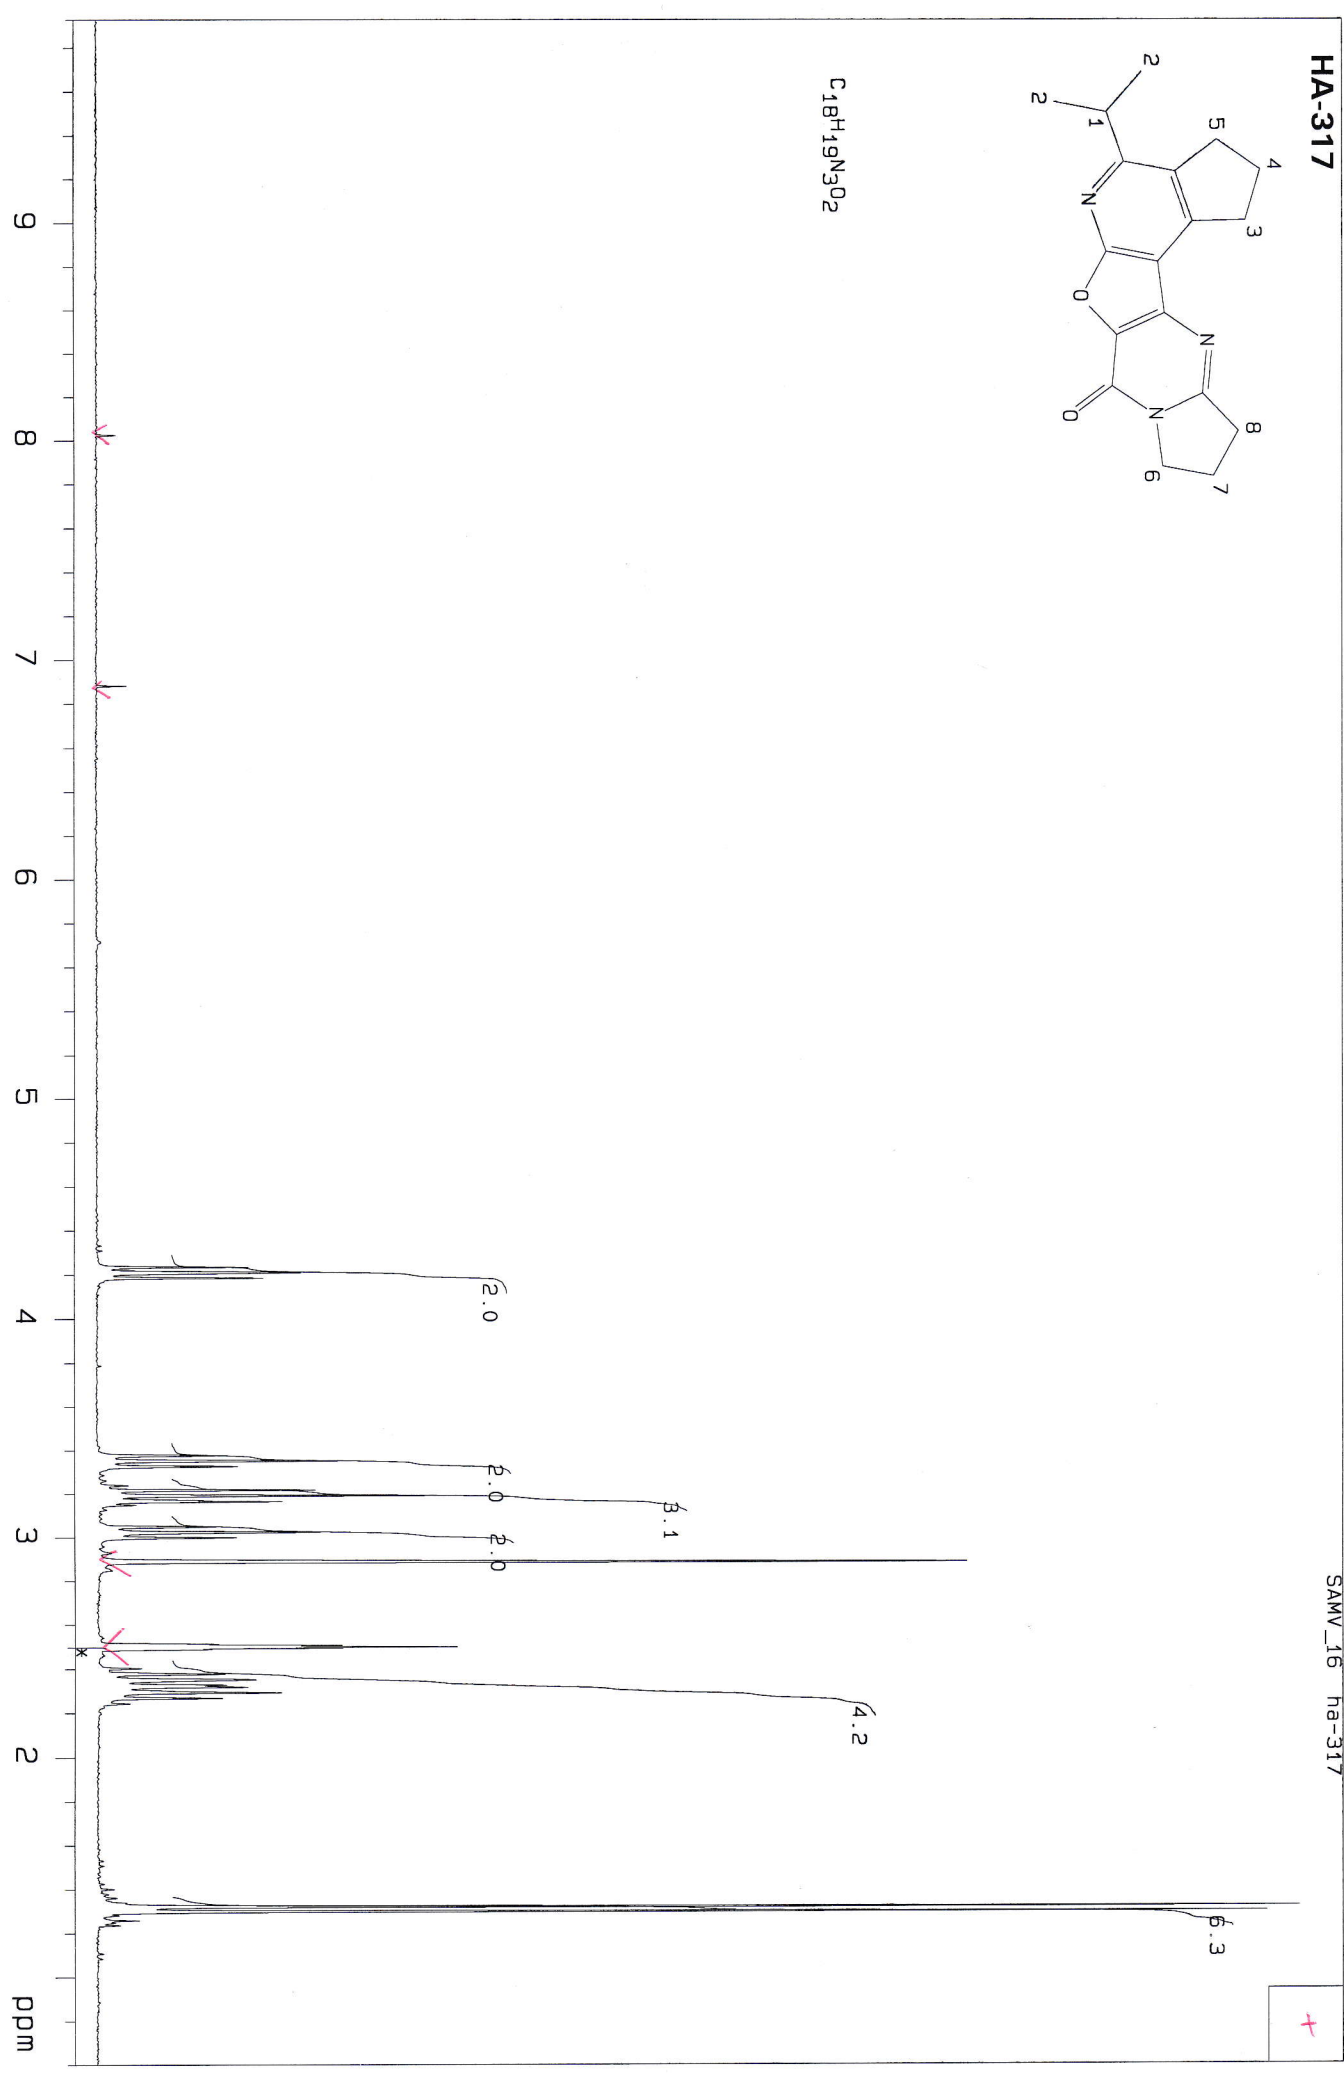

4a

Molecular Structure Research Centre, Yerevan, Armenia, Varian Mercury-300VX

HA-317

C13 75.462 MHz, nt = 368, np = 19998, temp = 30.0 C, lb = 1.0, solvent = DMSO/CD4 1/3

SAMV\_14 ha-317

Oct 21 2014

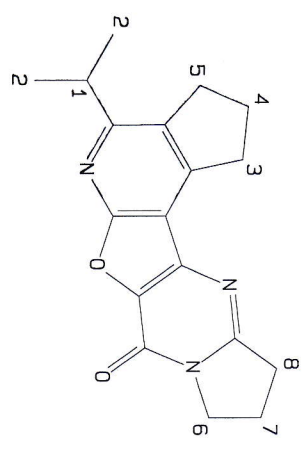

C<sub>18</sub>H<sub>19</sub>N<sub>3</sub>O<sub>2</sub>

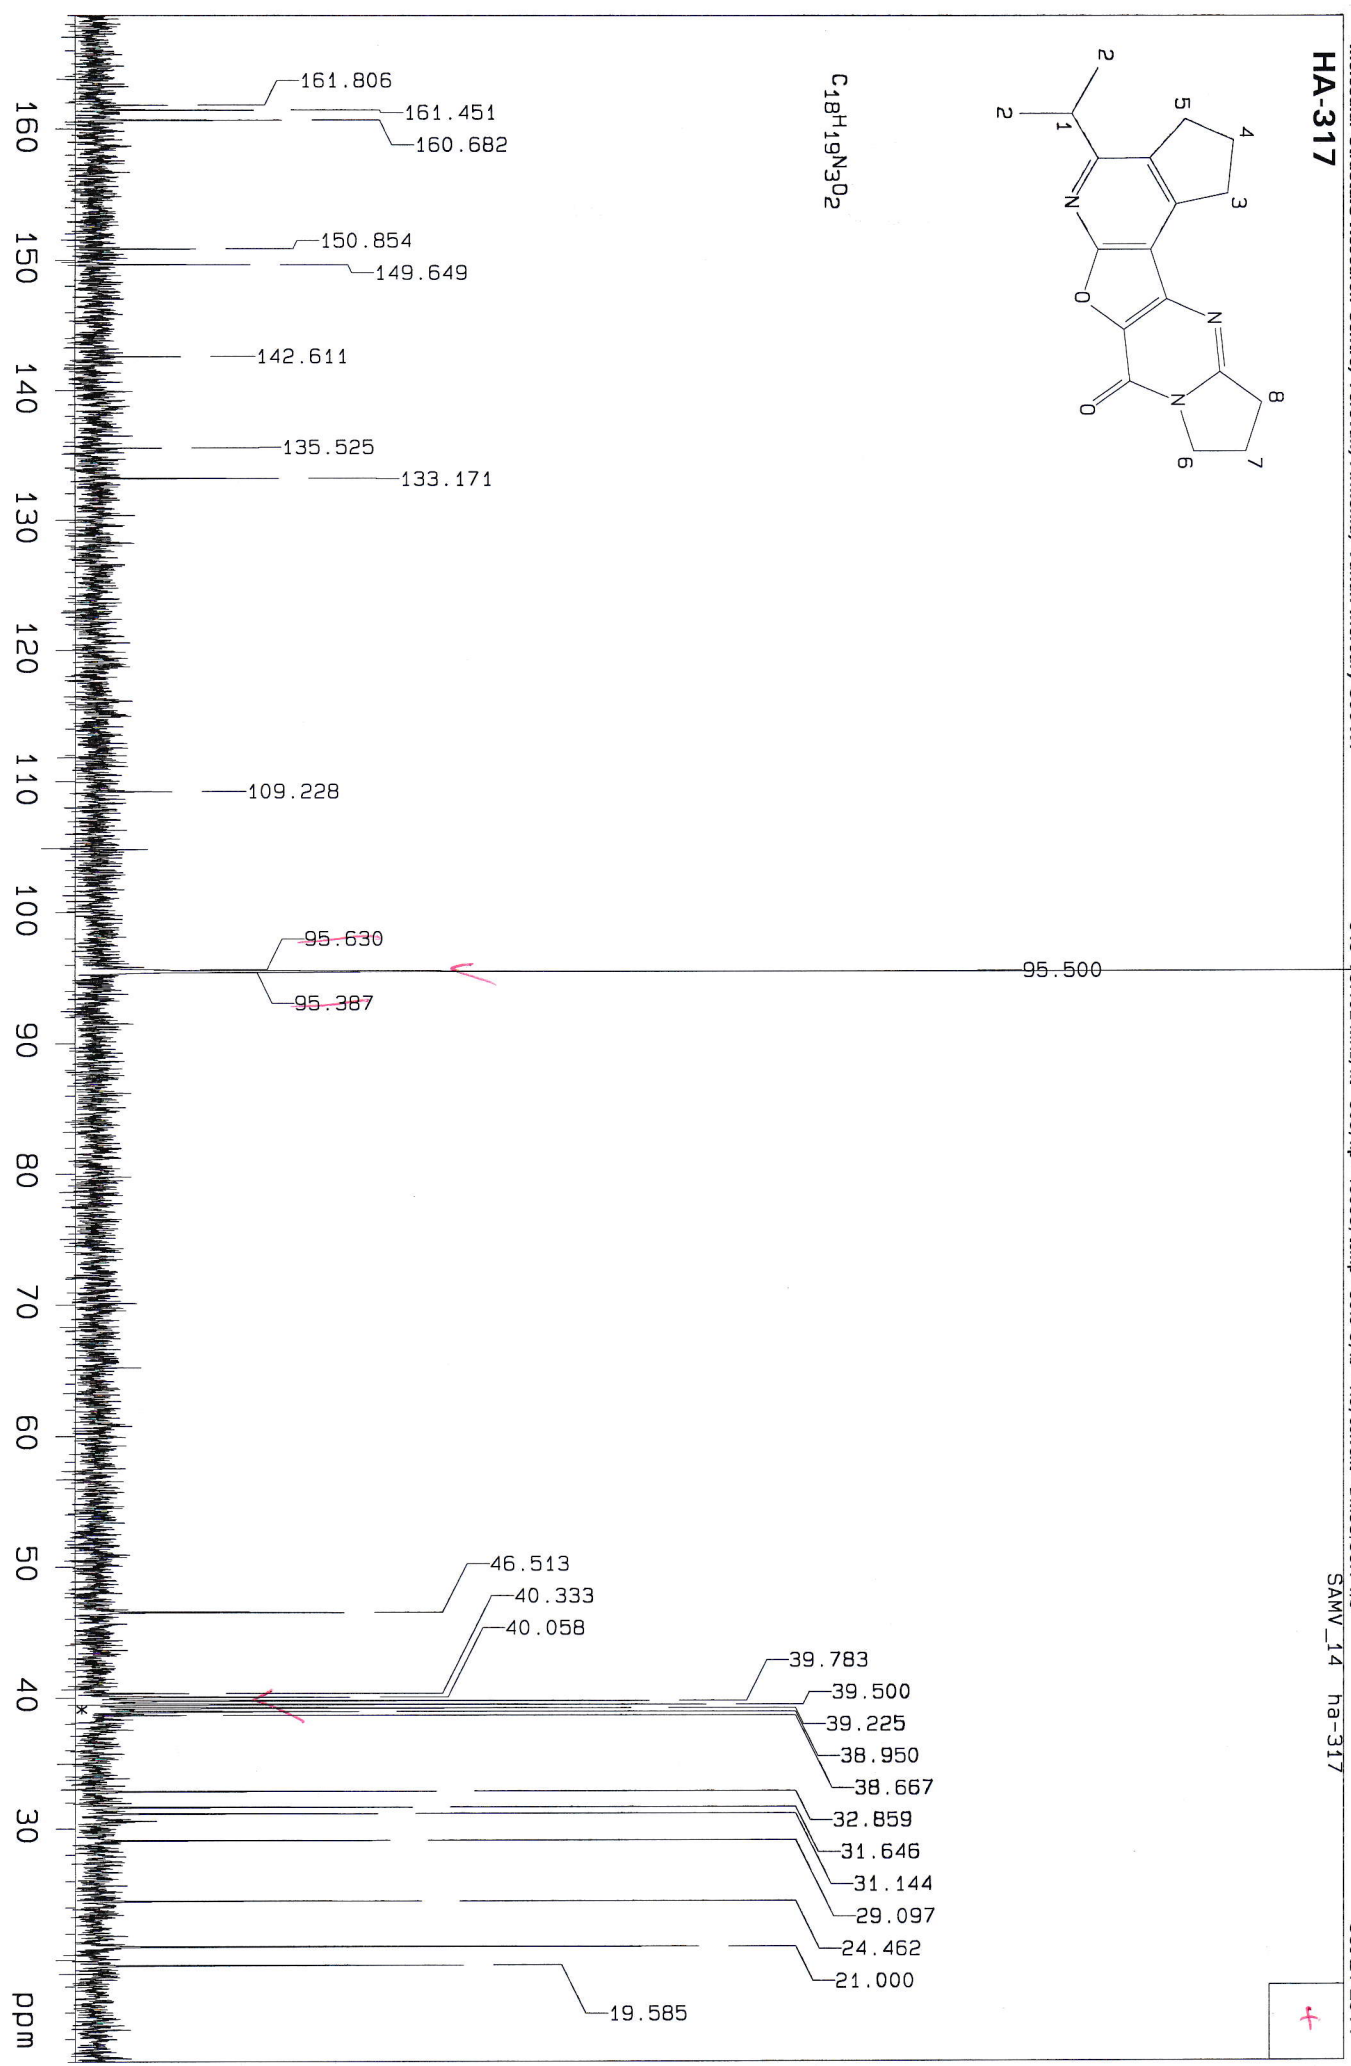

+



46

*[Handwritten signature]*

Molecular Structure Research Centre, Yerevan, Armenia, Varian Mercury-300VX

H1 300.077 MHz, nt = 16, np = 16000, temp = 30.0 C, lb = -0.2, solvent = DMSO/Cd4 1/3

SAMV\_11 na-459

Nov 8 2011

HA-459

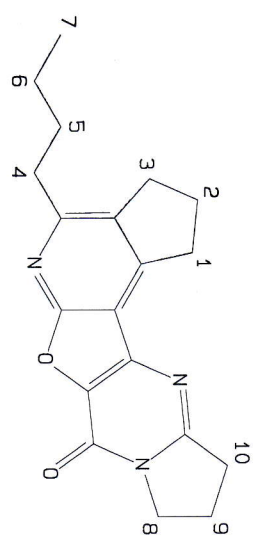

C<sub>19</sub>H<sub>21</sub>N<sub>3</sub>O<sub>2</sub>

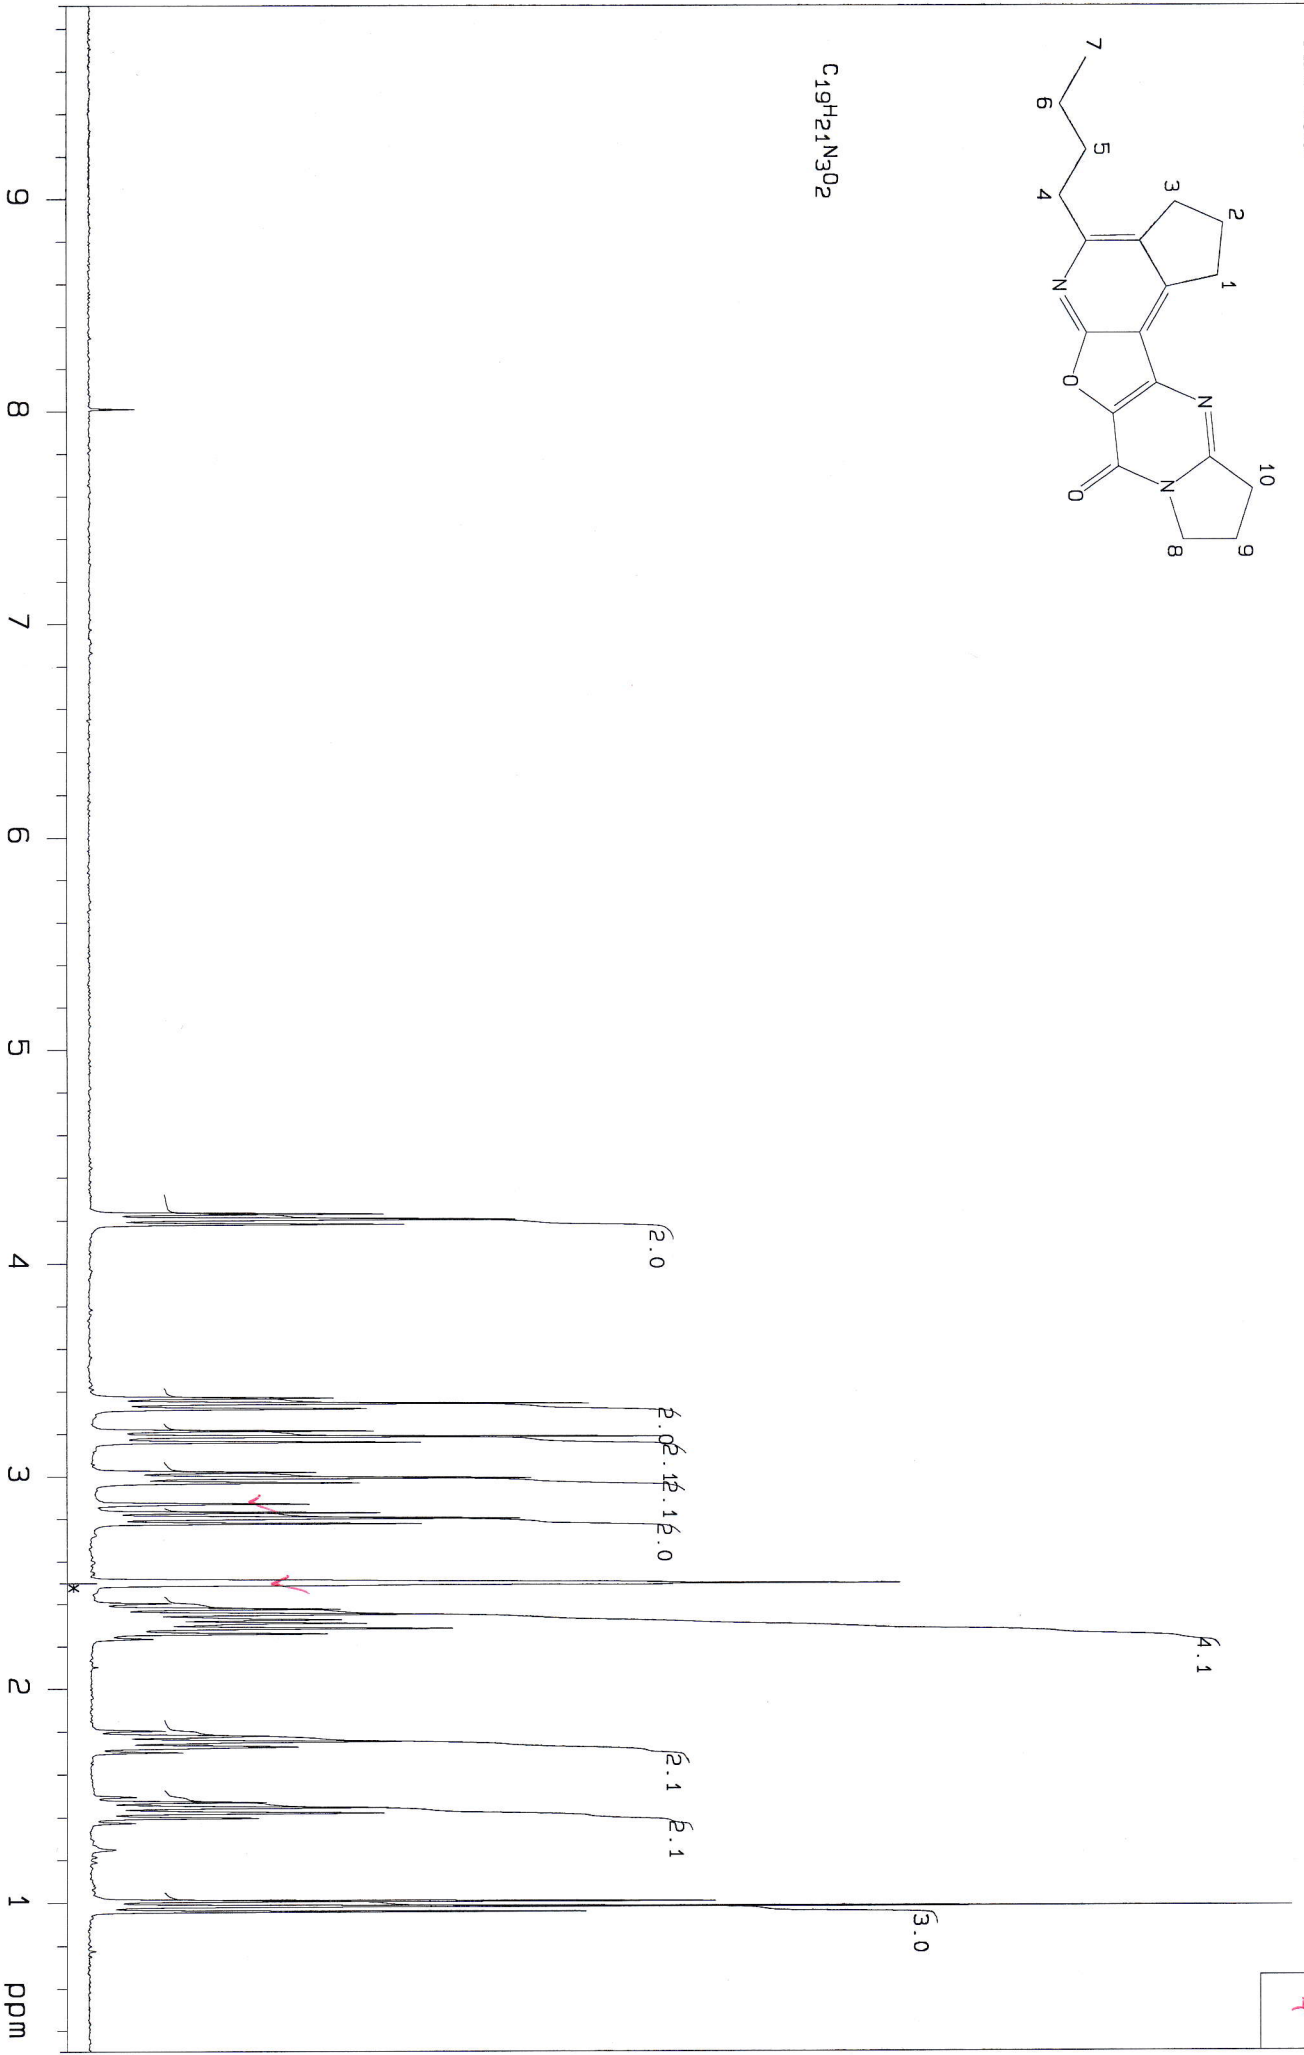

46

Molecular Structure Research Centre, Yerevan, Armenia, Varian Mercury-300VX

HA-459

C13 75.462 MHz, nt=368, np=19998, temp=30.0 C, lb=1.0, solvent=DMSO/C14 1/3

SAMV\_11 ha-459

Oct 22 2014

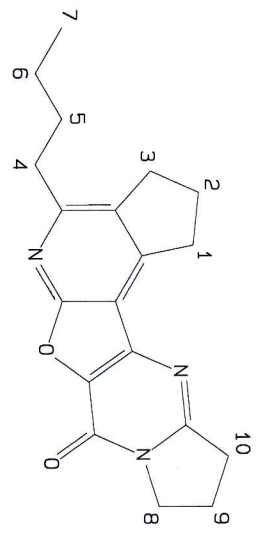

C<sub>19</sub>H<sub>21</sub>N<sub>3</sub>O<sub>2</sub>

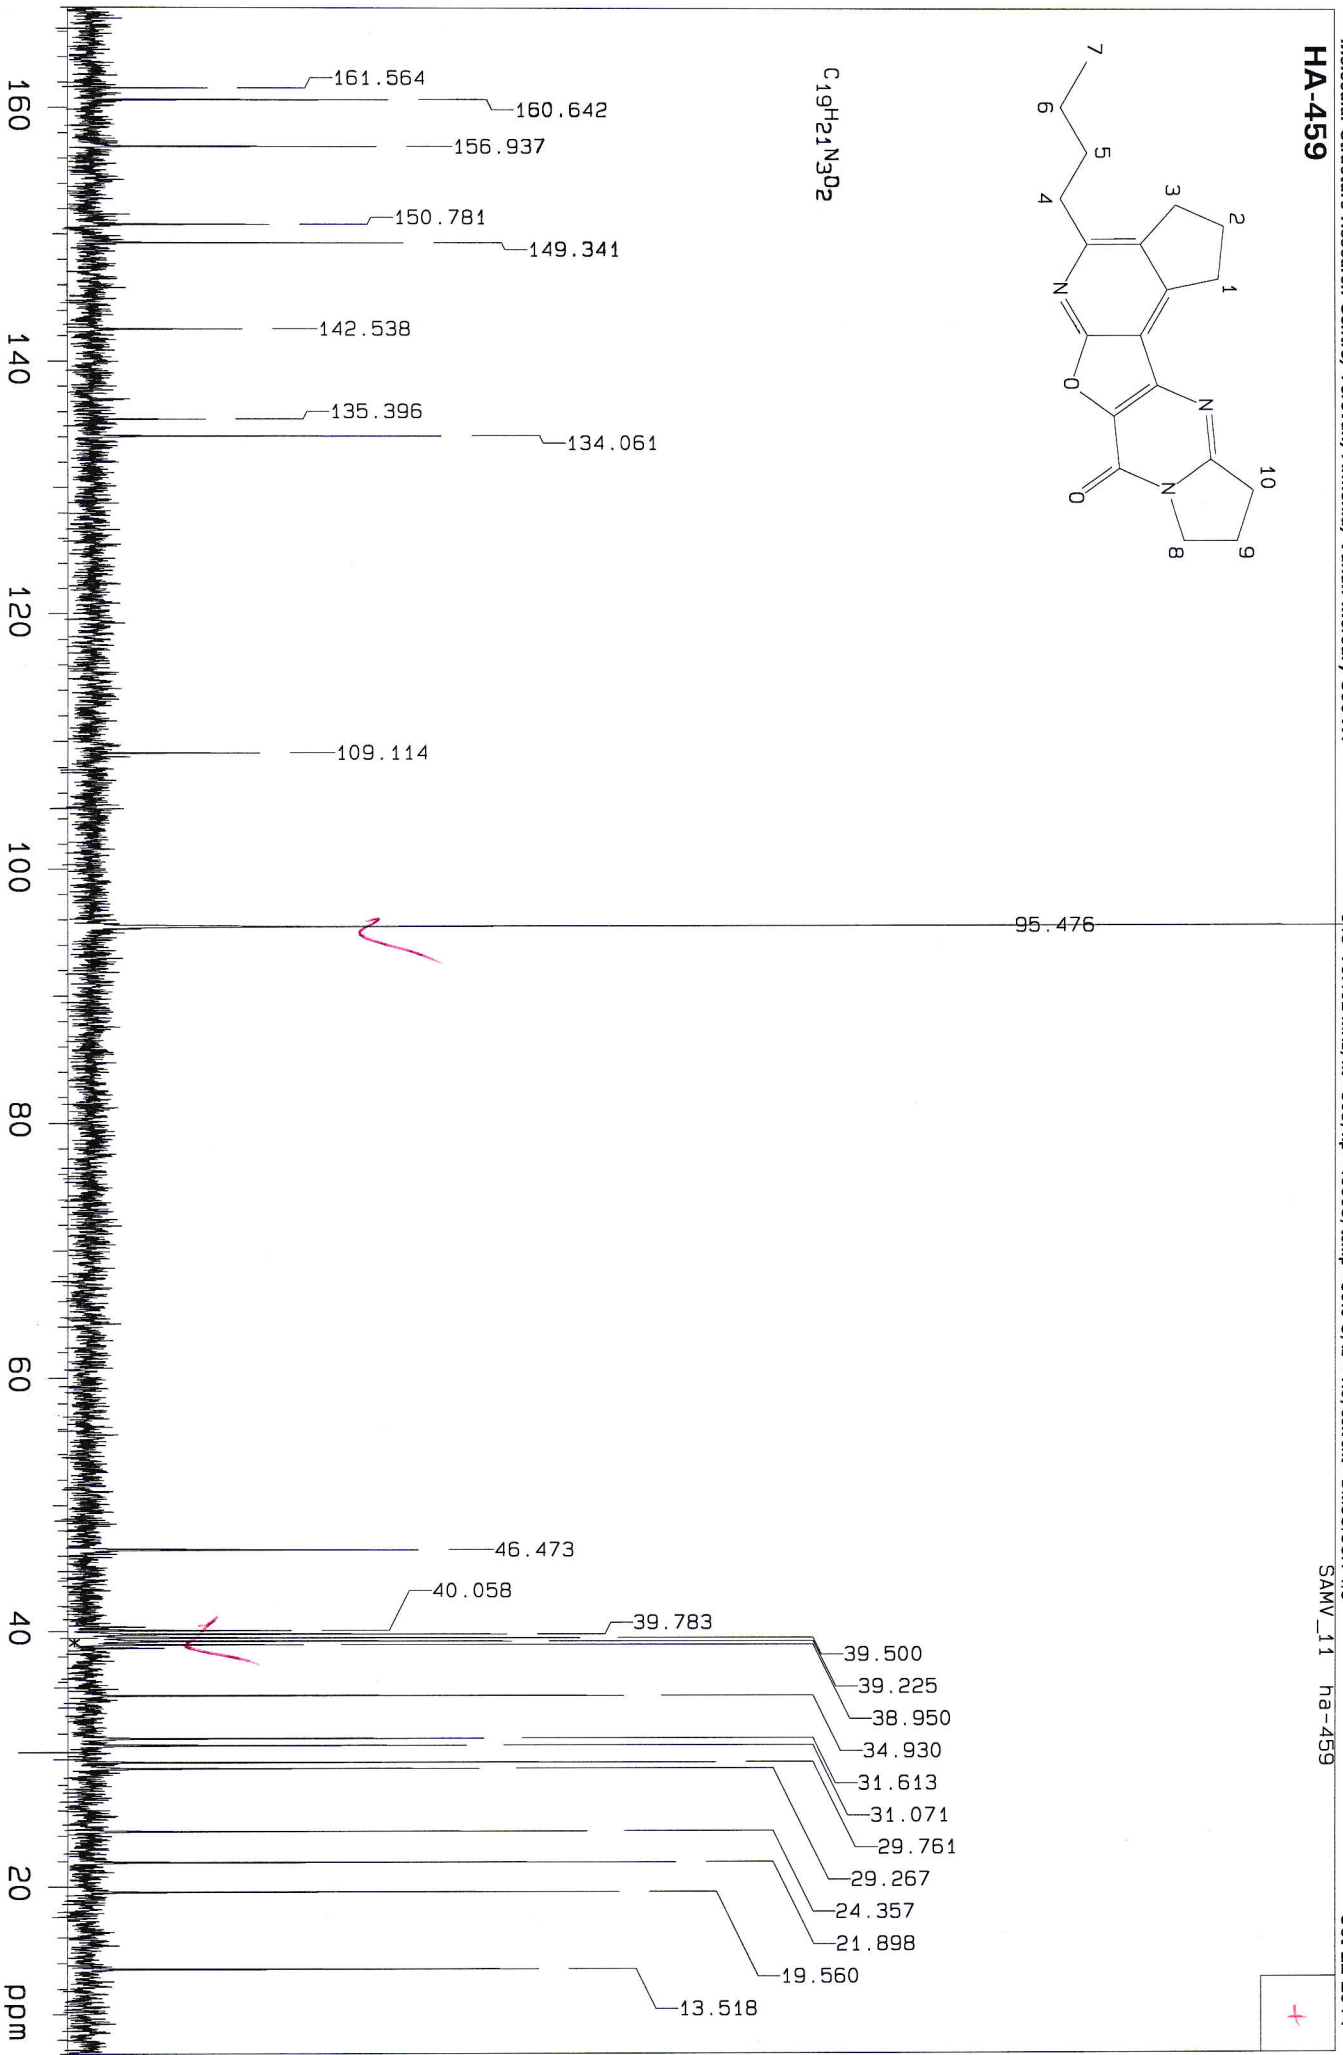

4c

HA-334  
Molecular Structure Research Centre, Yerevan, Armenia, Varian Mercury-300VX

H1 300.077 MHz, nt = 16, np = 16000, temp = 30.0 C, lb = -0.2, solvent = DMSO/CDCl4 1/3

SAMV\_16 ha-334

Feb 29 2016

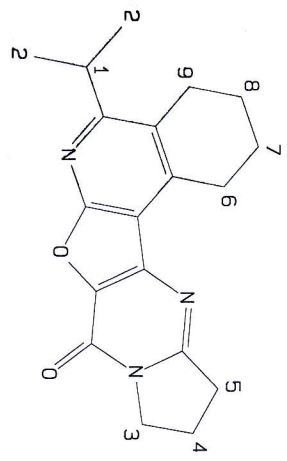

C<sub>19</sub>H<sub>21</sub>N<sub>3</sub>O<sub>2</sub>

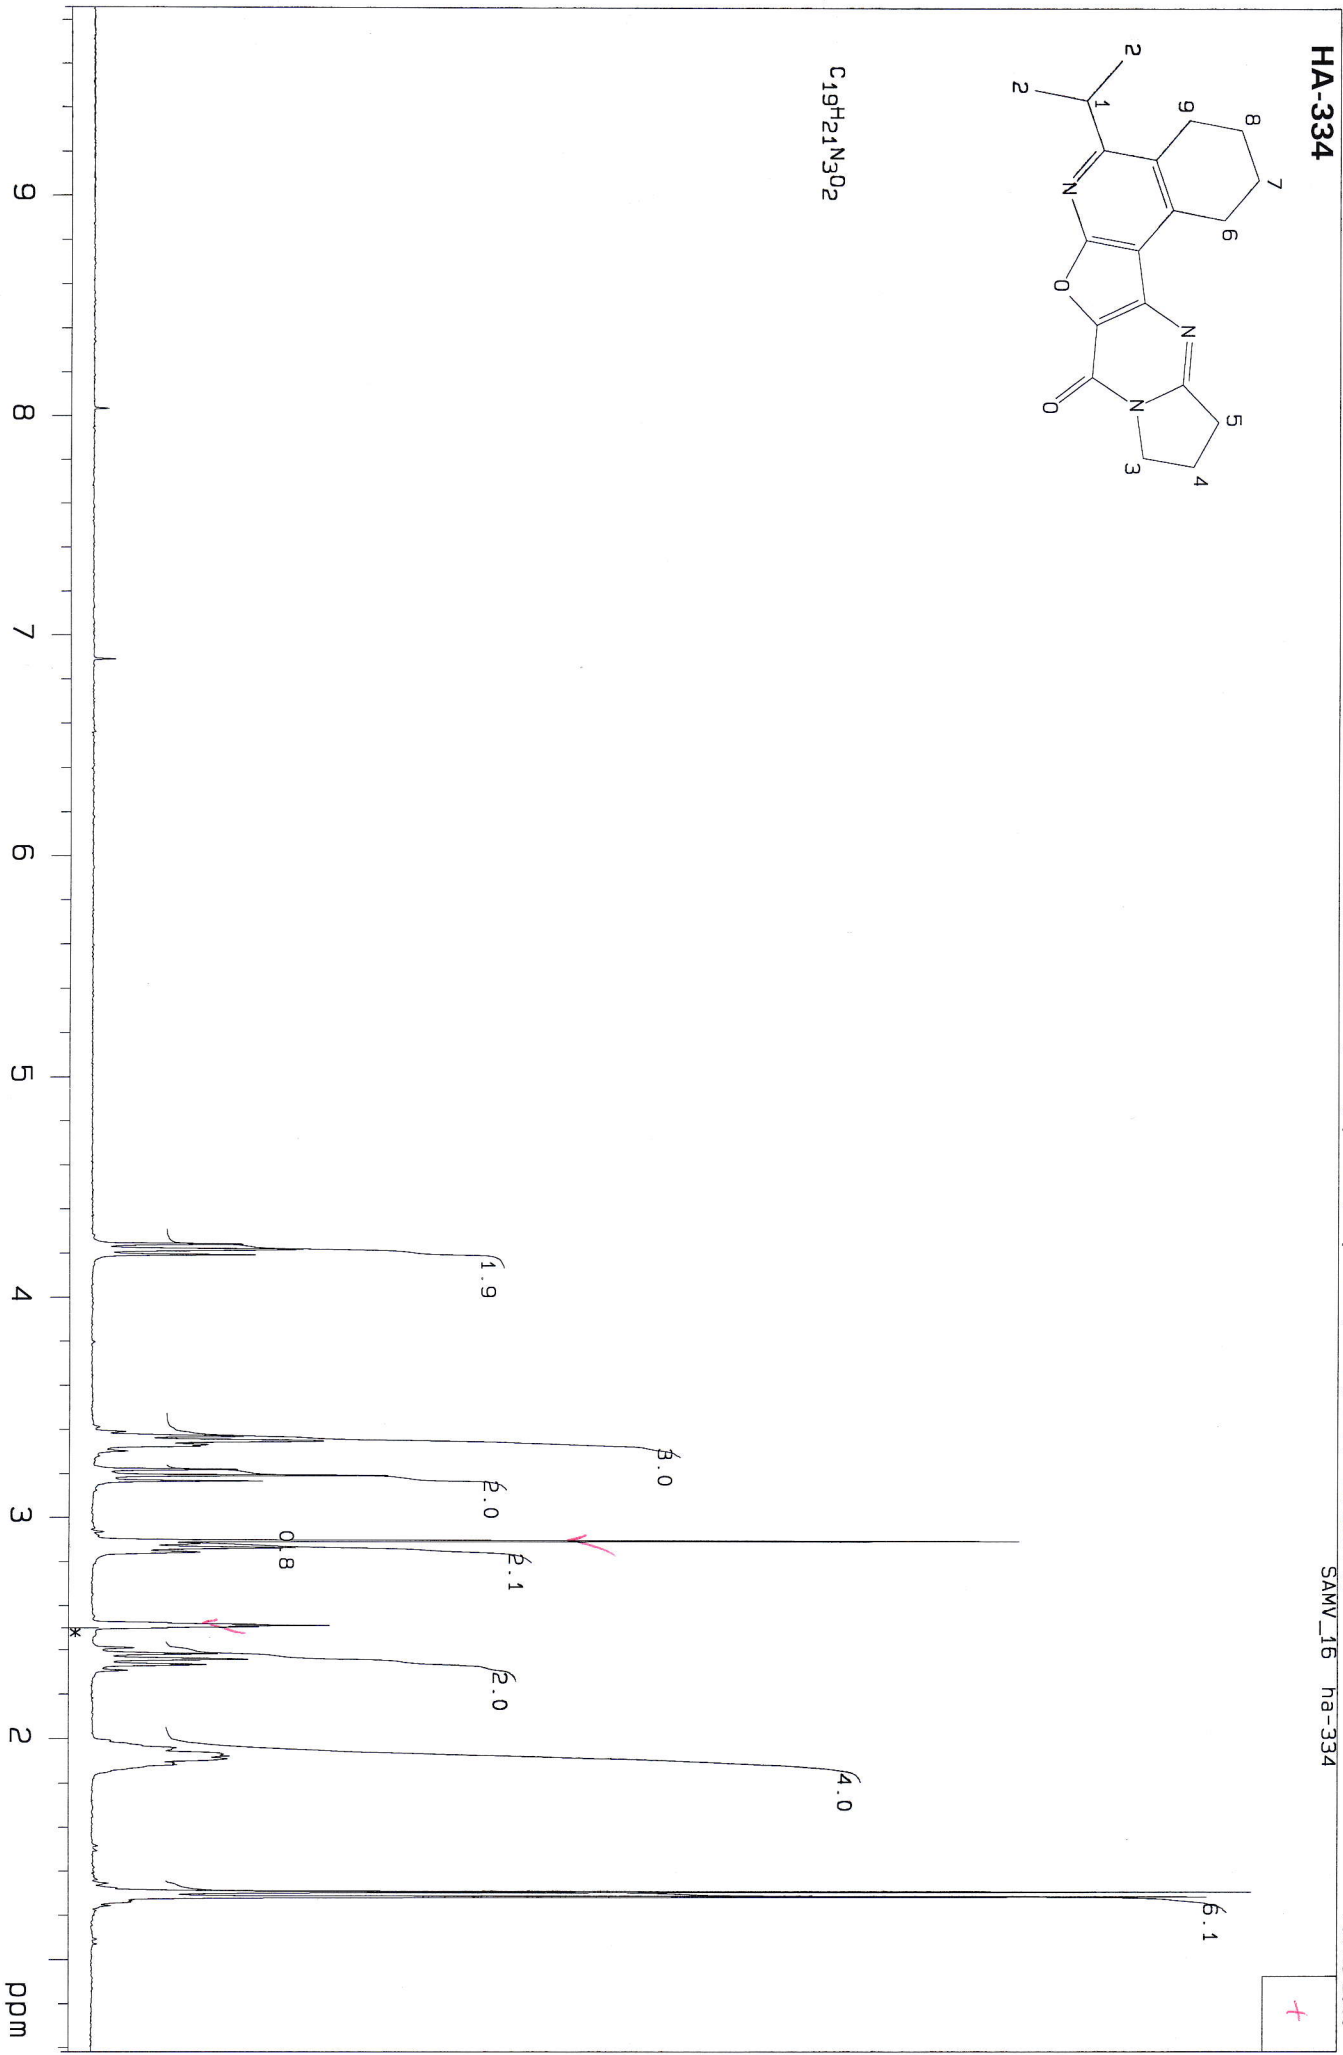

+

4c

HA-334

Molecular Structure Research Centre, Yerevan, Armenia, Varian Mercury-300VX

C13 75.462 MHz, nt = 1600, np = 19998, temp = 30.0 C, lb = 1.0, solvent = DMSO/CCL4 1/3  
SAMV\_14 na=334

Oct 20 2014

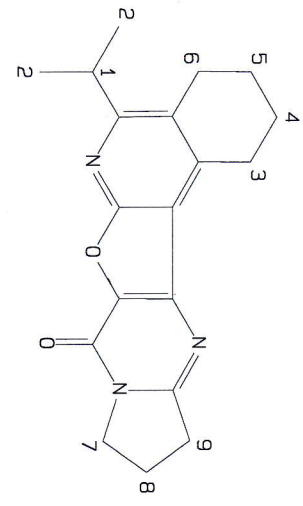

C<sub>19</sub>H<sub>12</sub>N<sub>3</sub>O<sub>2</sub>

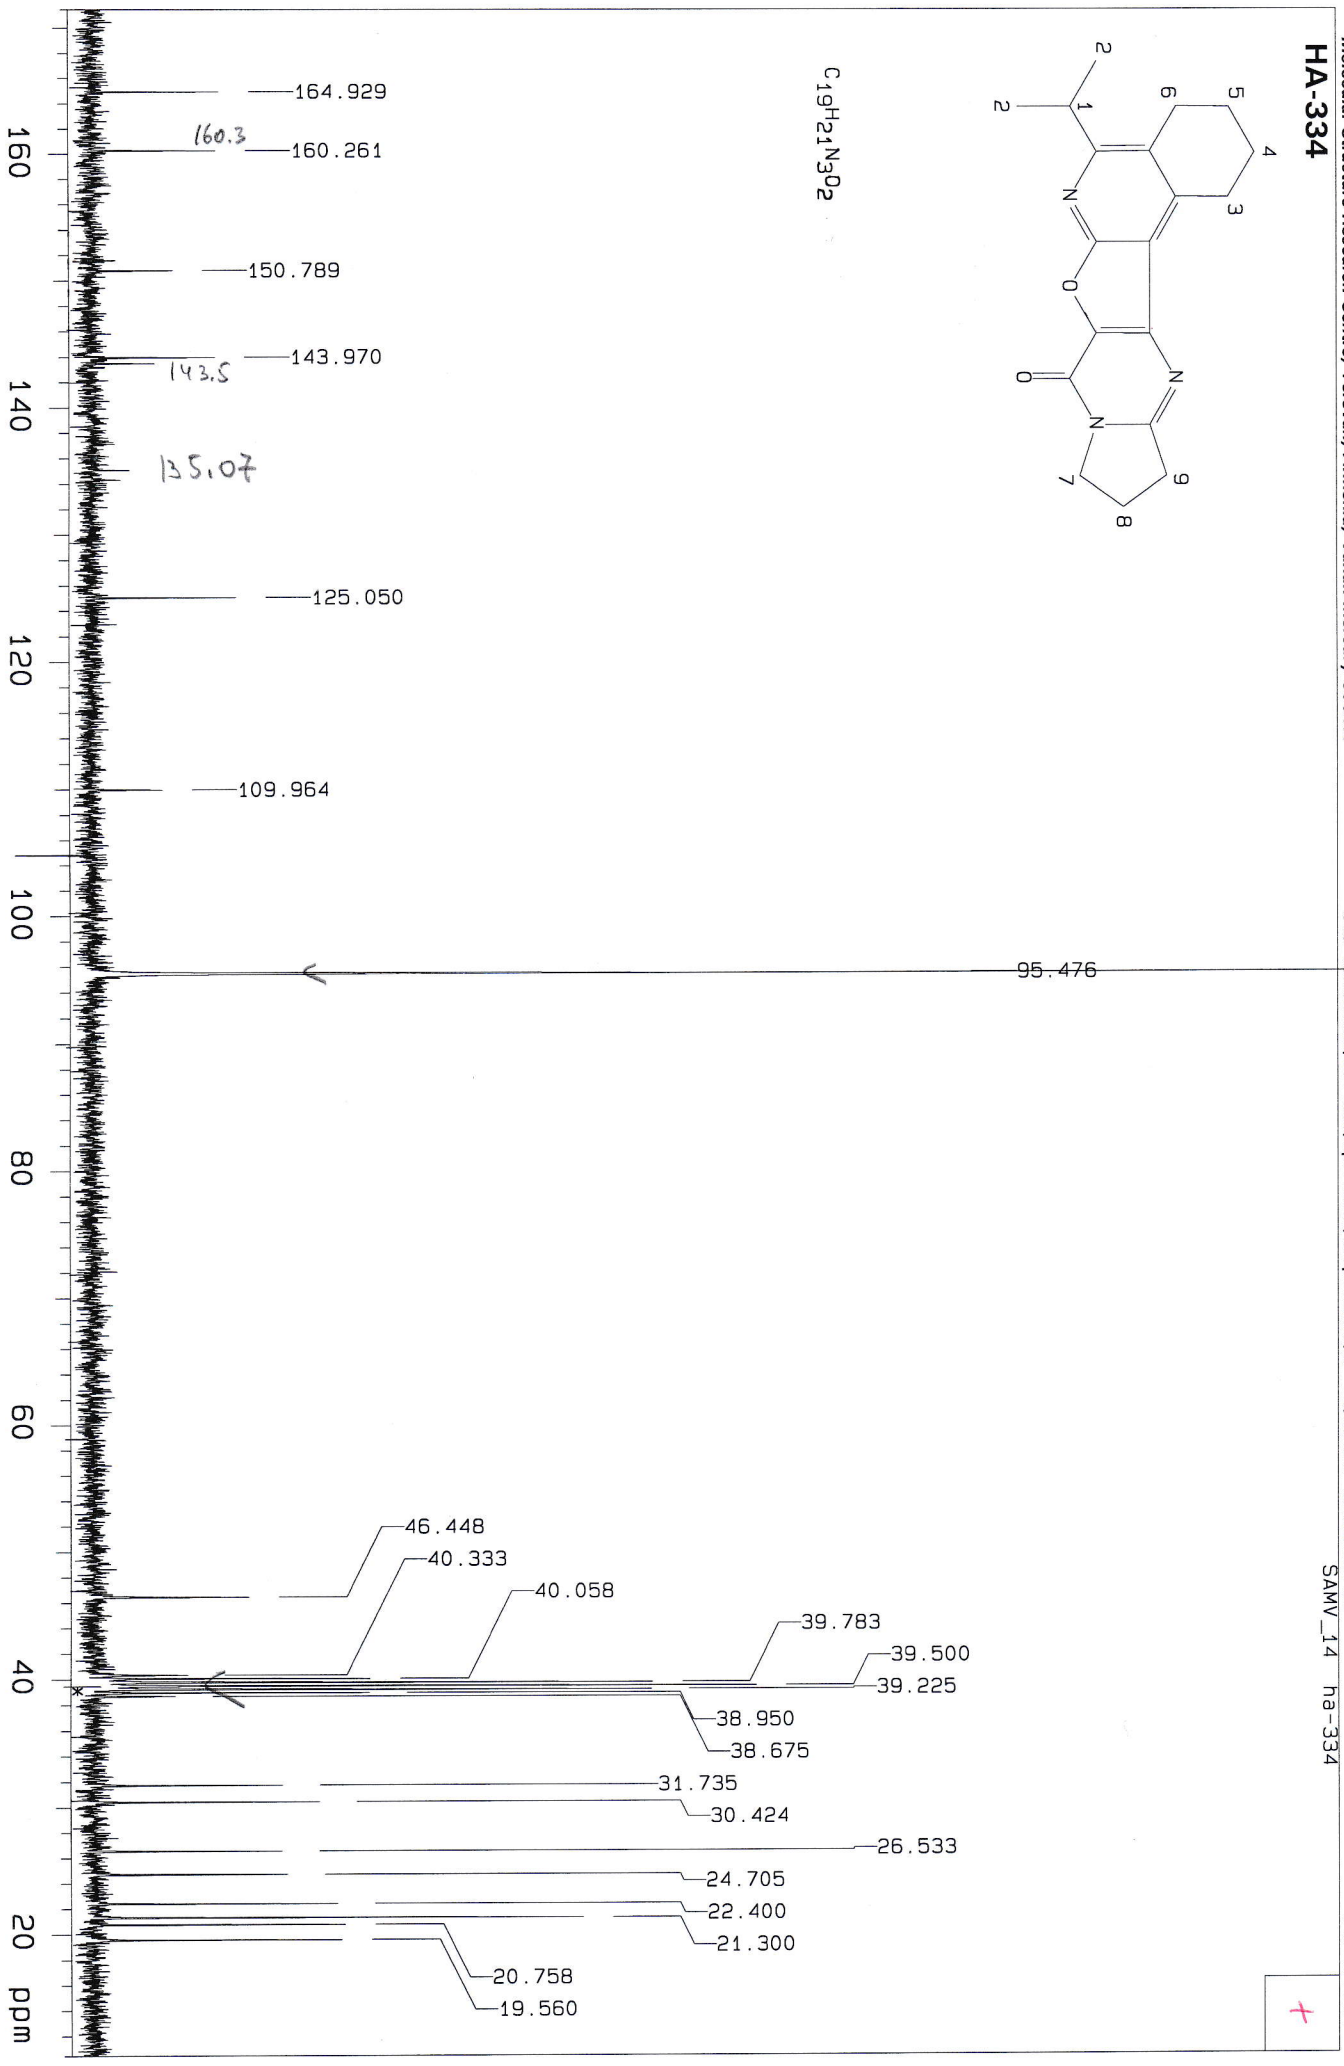

+

4101

Molecular Structure Research Centre, Yerevan, Armenia, Varian Mercury-300VX

H1 300.077 MHz, nt = 16, mp = 16000, temp = 30.0 C, lb = -0.2, solvent = DMSO/C14 1/3

SAMV\_11 ha-329

Oct 19 2011

HA-329

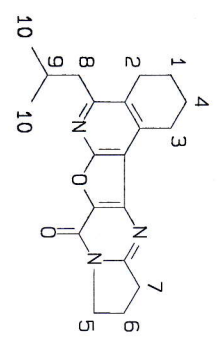

C<sub>20</sub>H<sub>23</sub>N<sub>3</sub>O<sub>2</sub>

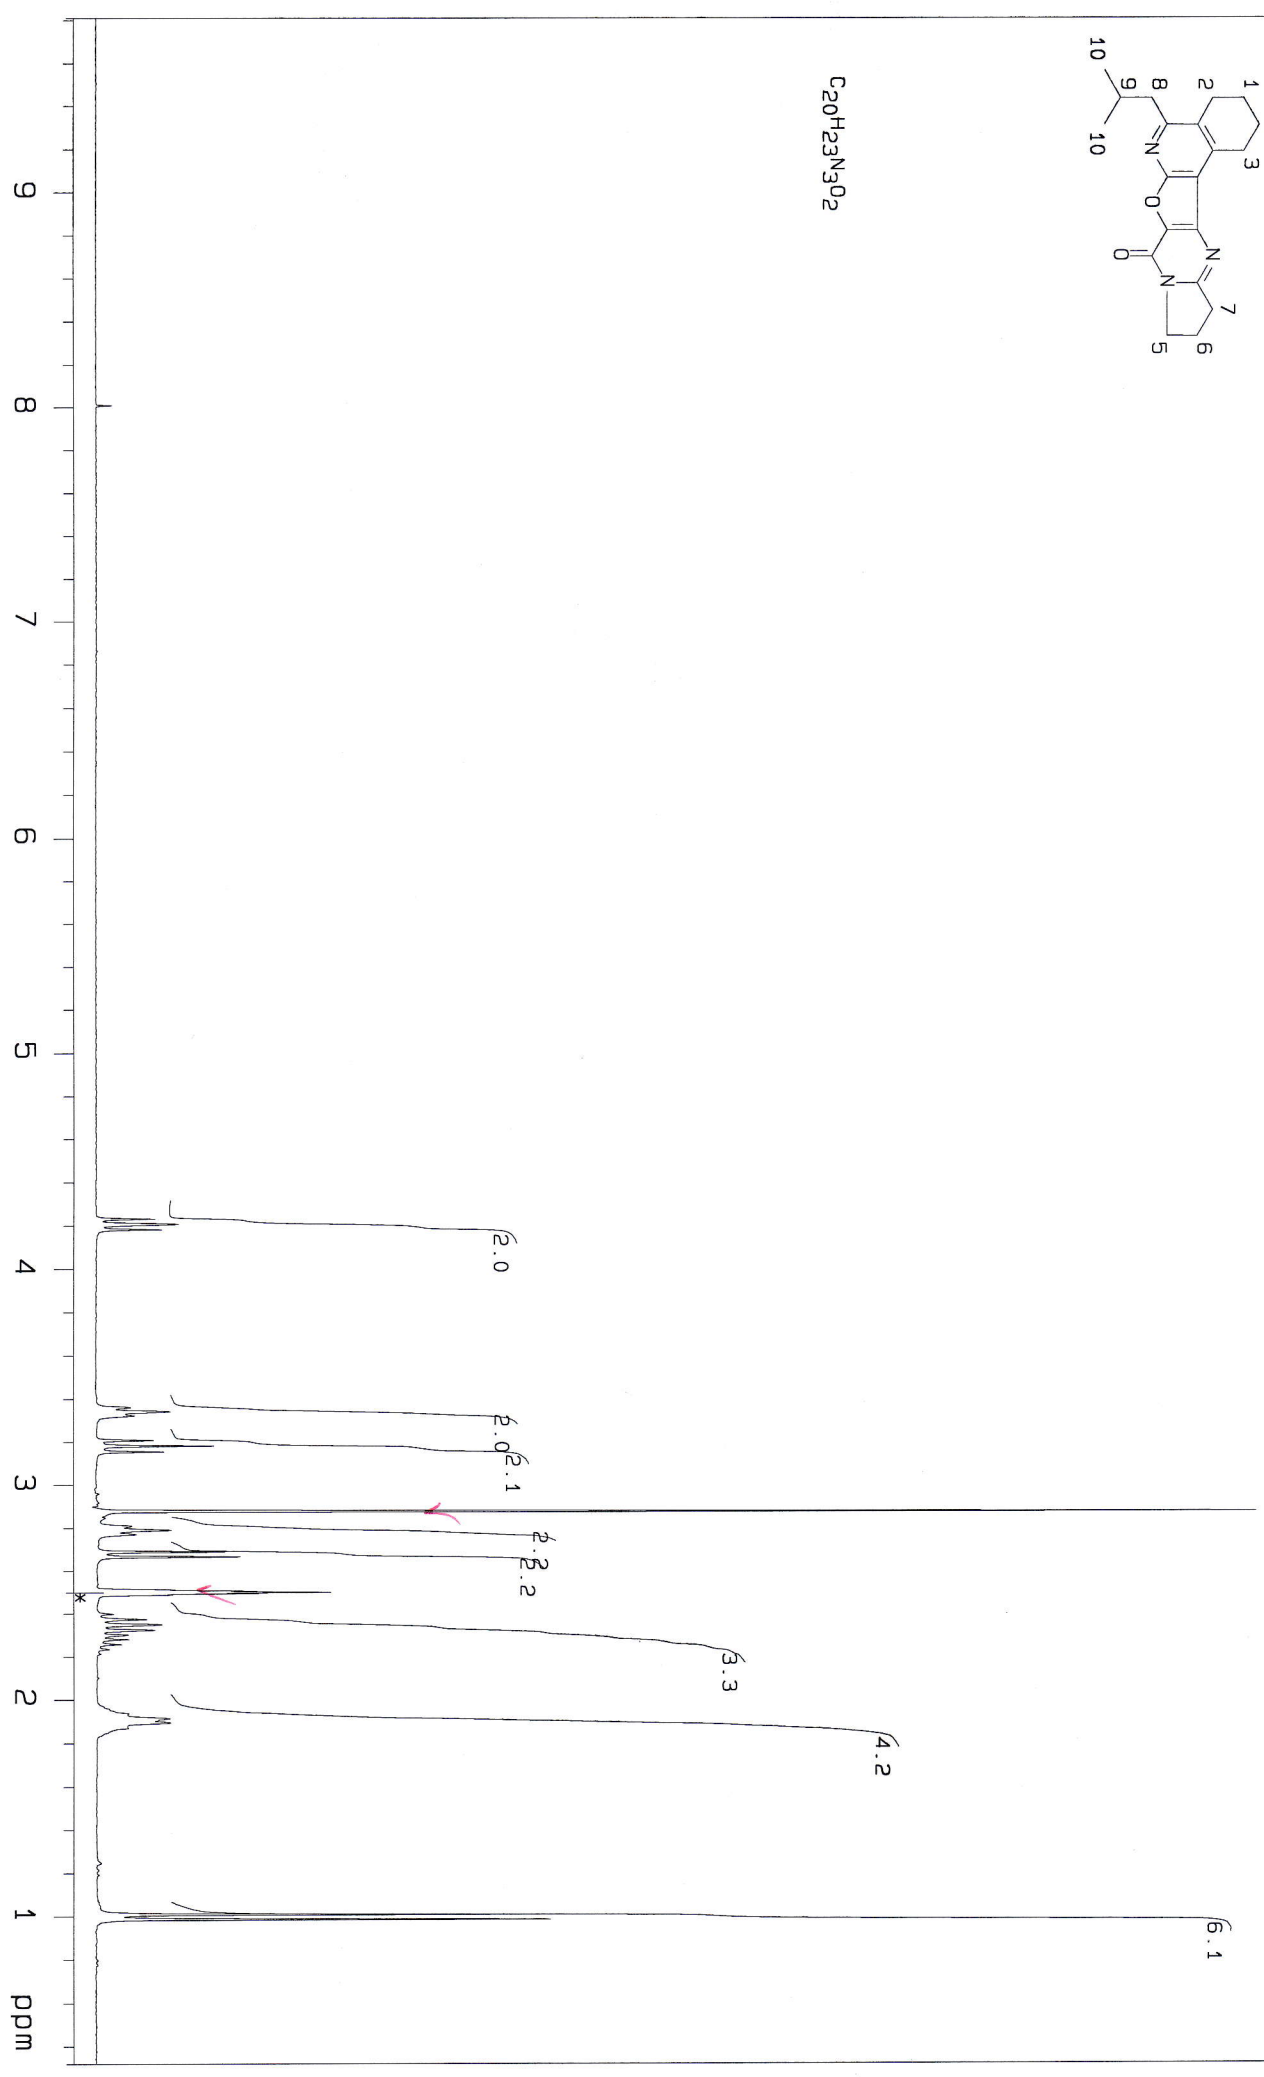

4d

HA-329  
Molecular Structure Research Centre, Yerevan, Armenia, Varian Mercury-300VX

C13 75.462 MHz, nt=432, np=19998, temp=30.0 C, lb=1.0, solvent=DMSO/C14 1/3  
SAWV\_11 ha-329

Oct 21 2014

+

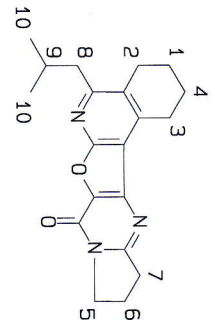

C<sub>20</sub>H<sub>12</sub>N<sub>3</sub>O<sub>2</sub>

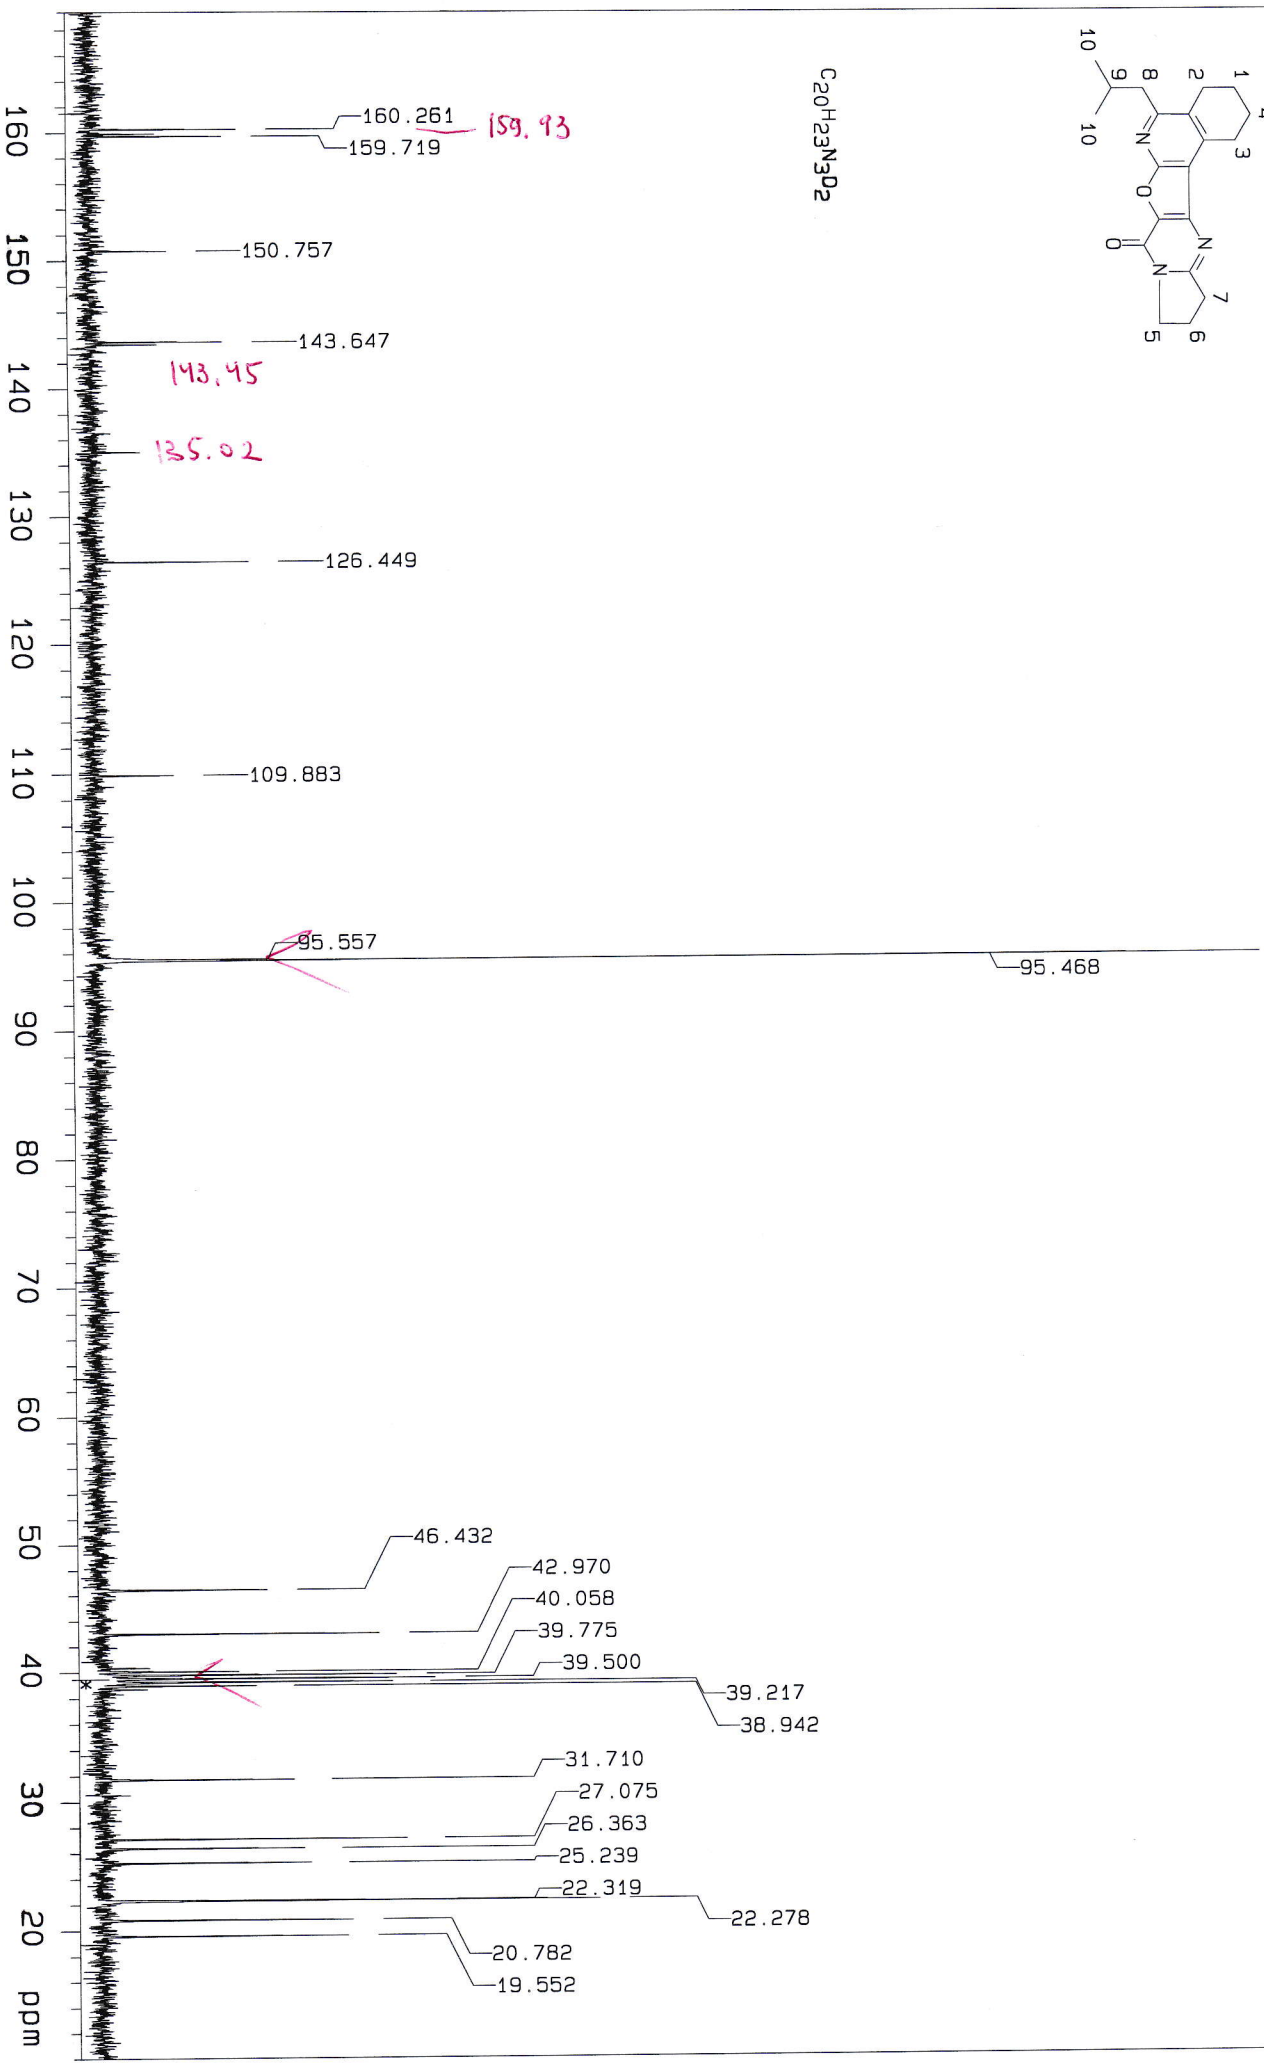

*[Handwritten signature]*

4e

Molecular Structure Research Centre, Yerevan, Armenia, Varian Mercury-300VX

H1 300.077 MHz, nt = 16, np = 16000, temp = 30.0 C, lb = -0.3, solvent = DMSO/CD4 1/3

Feb 8 2012

HA-588

SAMV\_12 ha-588

+

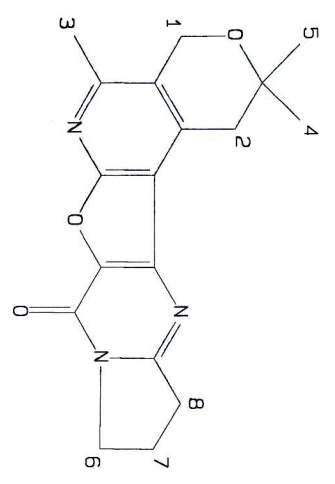

C<sub>18</sub>H<sub>19</sub>N<sub>3</sub>O<sub>3</sub>

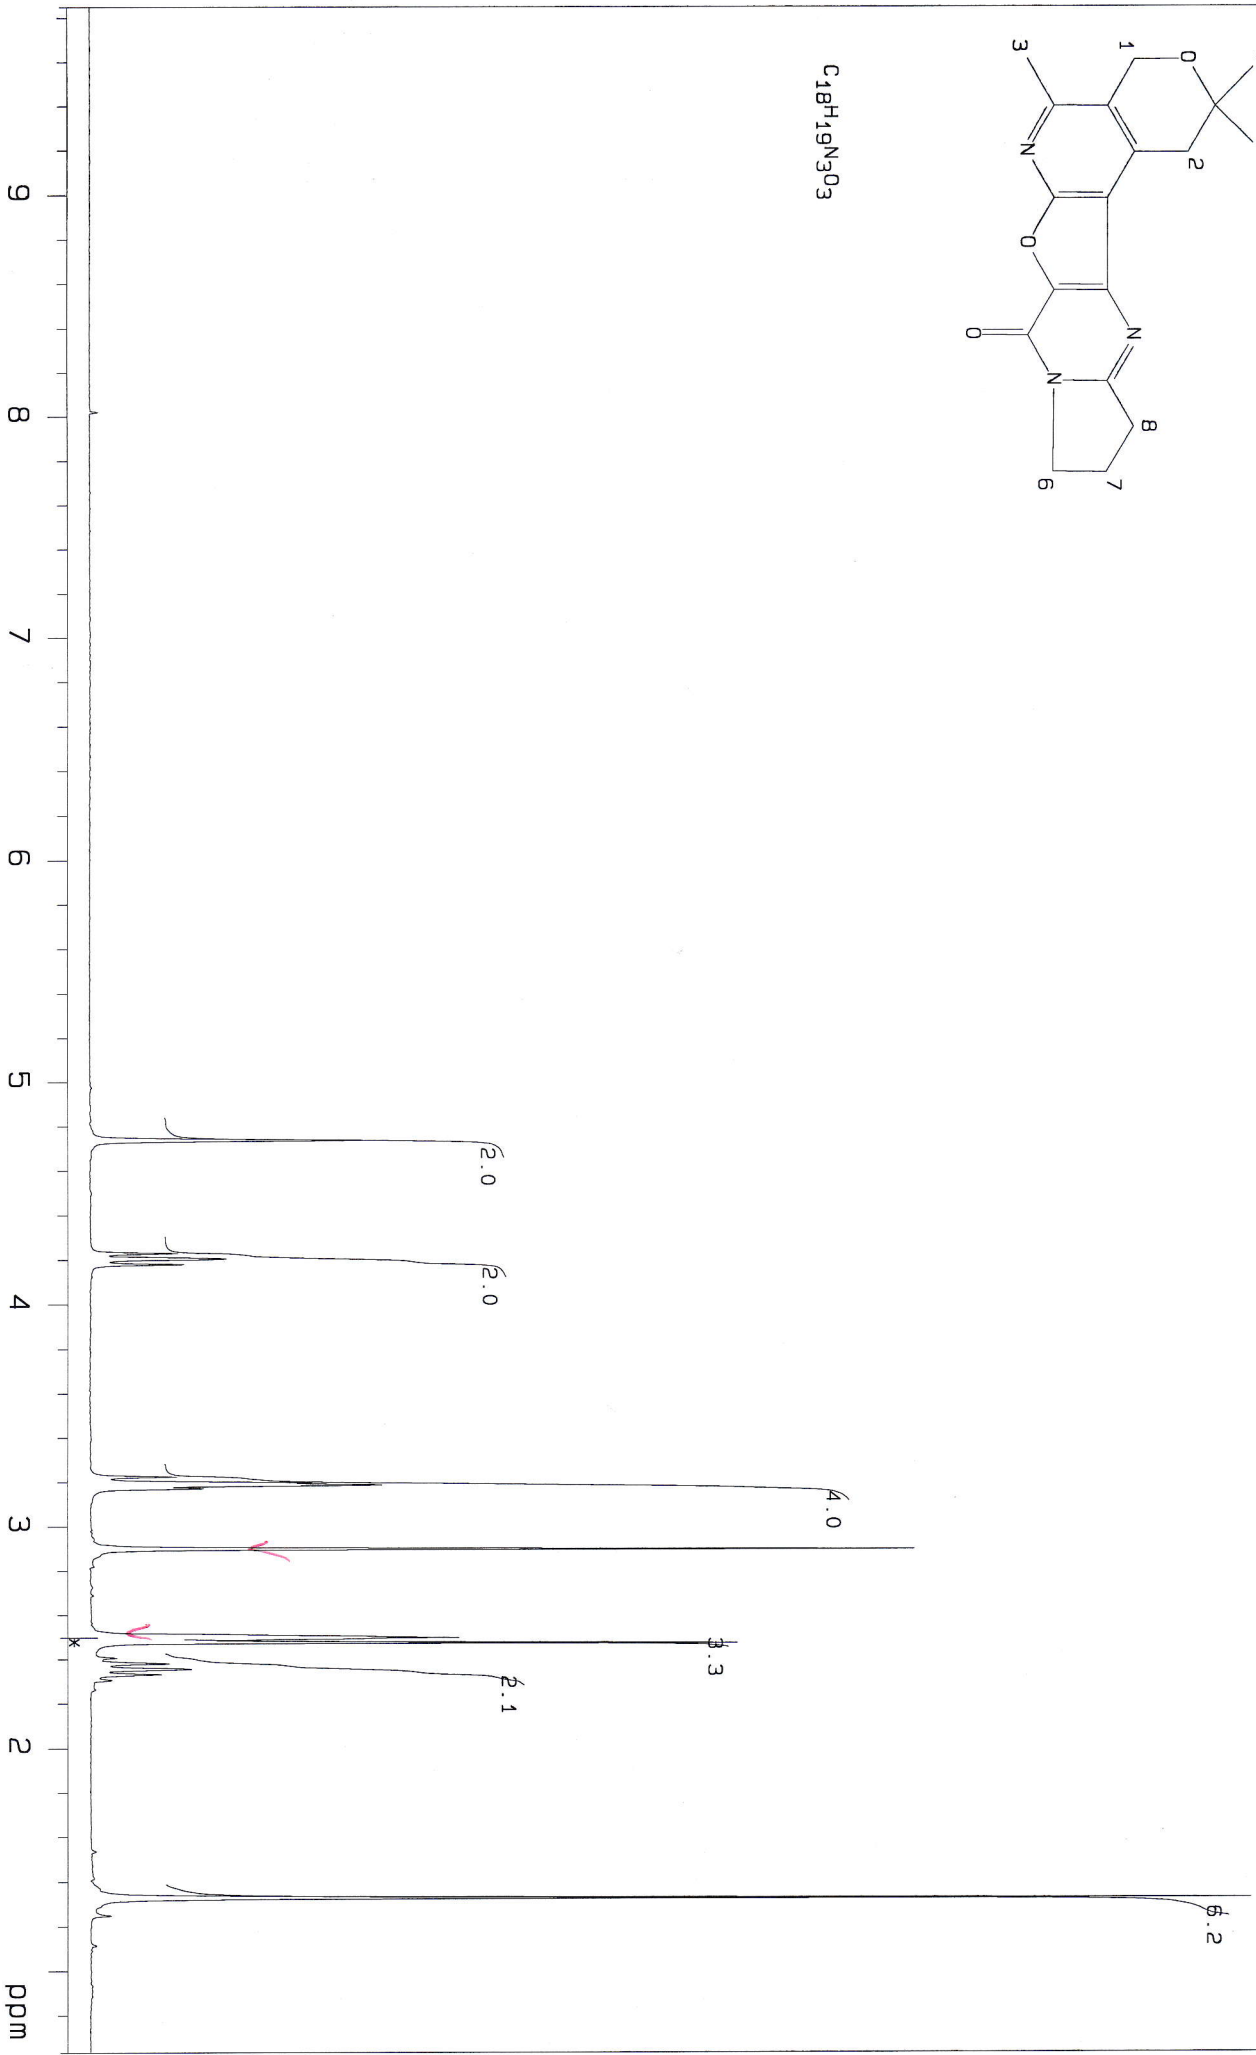

Shiro



4c

*Spice*

HA-588  
Molecular Structure Research Centre, Yerevan, Armenia, Varian Mercury-300VX

C13 75.462 MHz, nt=448, np=19998, temp=30.0 C, lb=1.0, solvent=DMSO/C4 1/3  
SAMV\_12 ha-588

Oct 22 2014

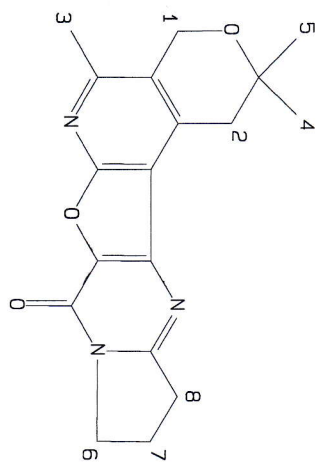

C<sub>18</sub>H<sub>19</sub>N<sub>3</sub>O<sub>3</sub>

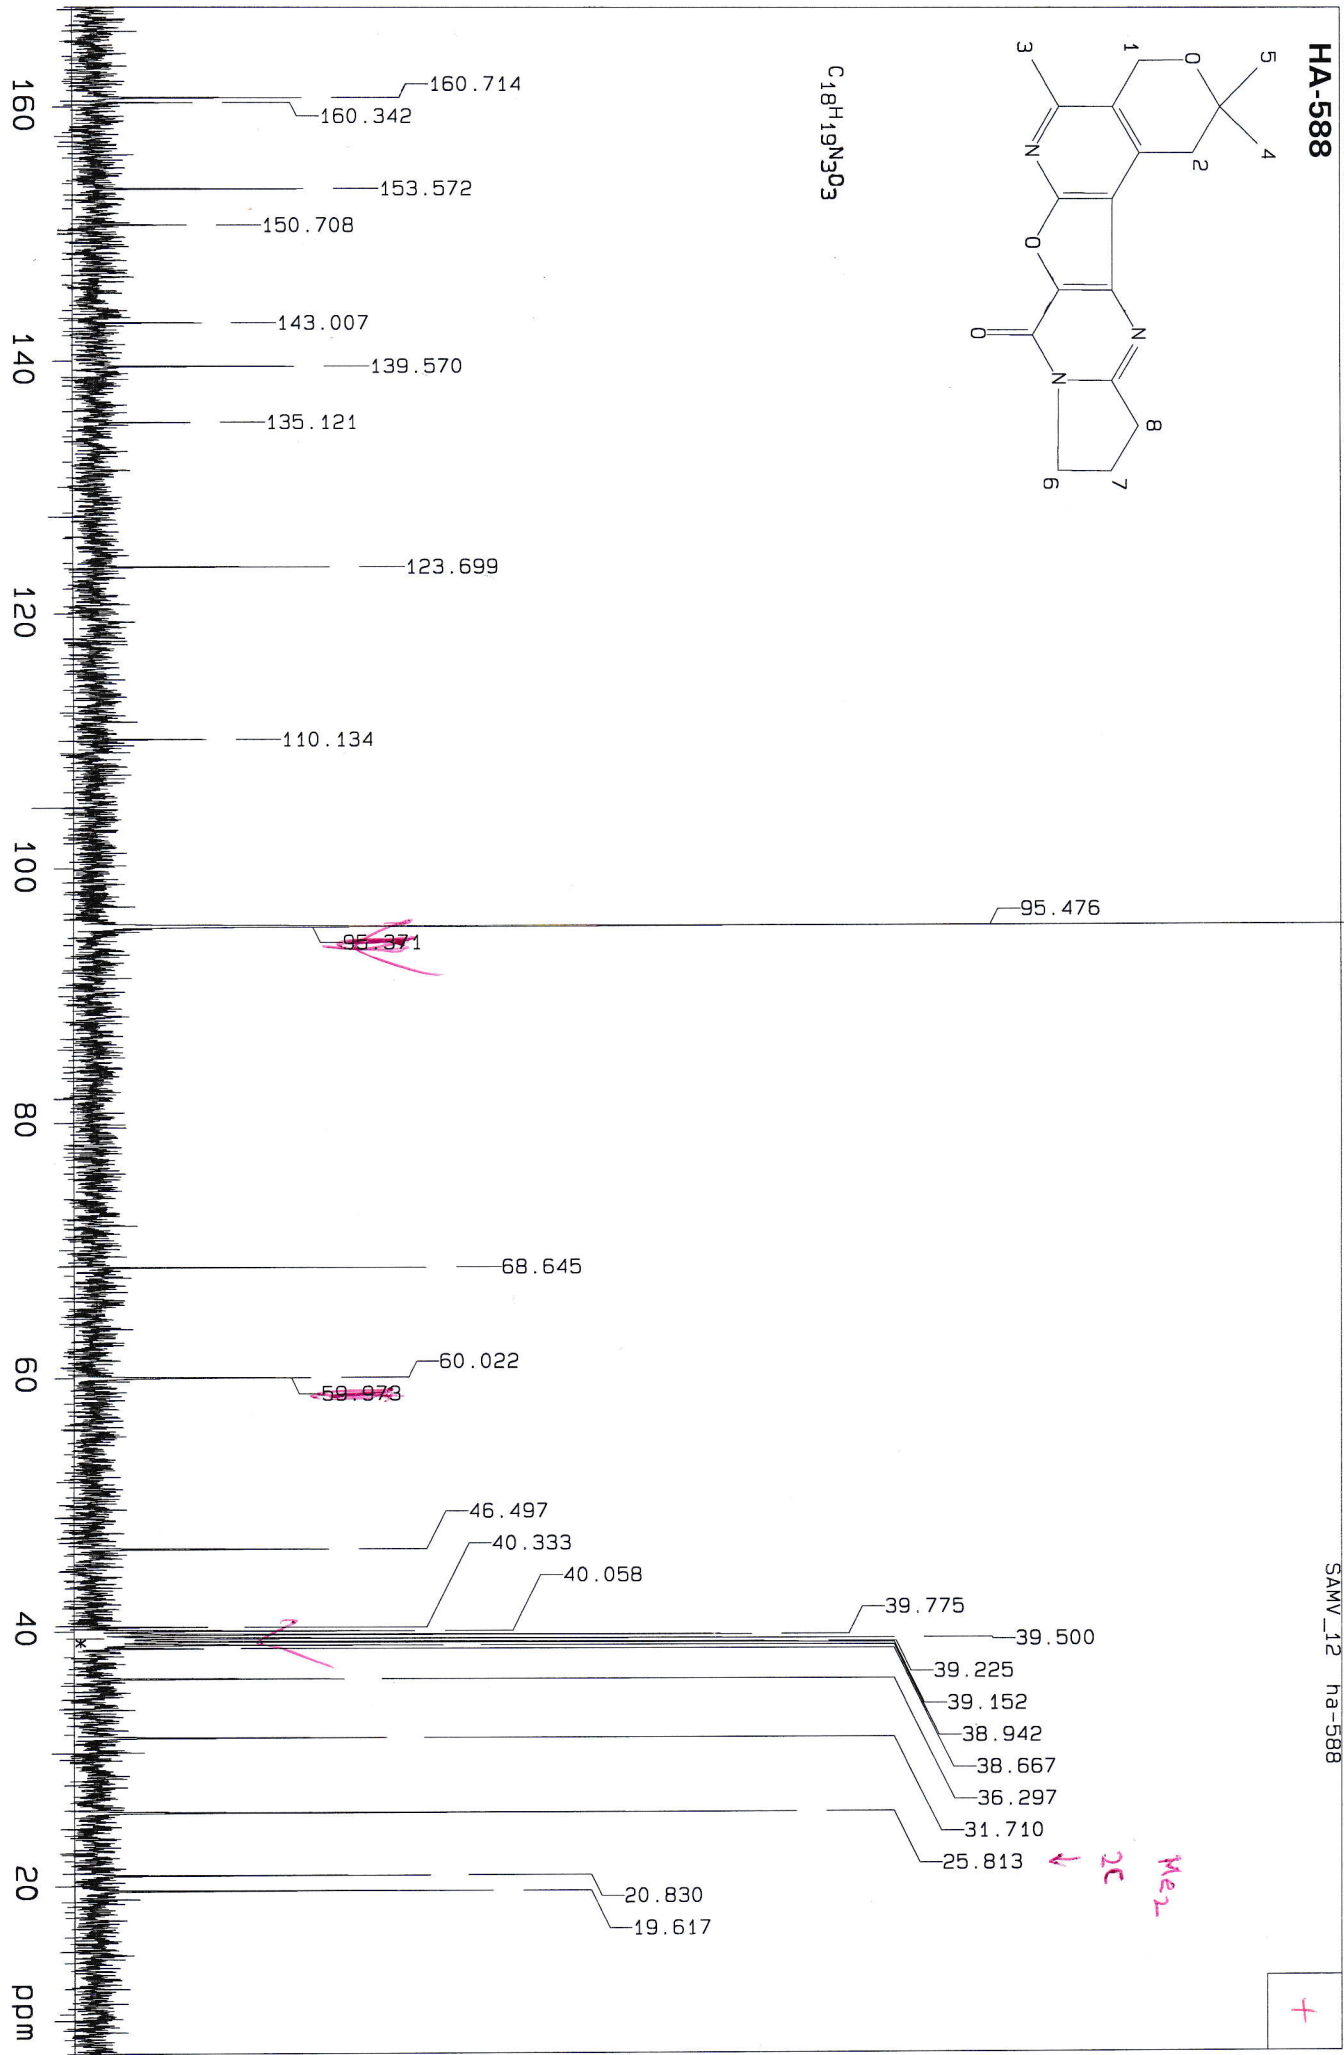

+



4P

Molecular Structure Research Centre, Yerevan, Armenia, Varian Mercury-300VX

H1 300.077 MHz, nt = 16, np = 16000, temp = 30.0 C, lb = -0.2, solvent = DMSO/Cd4 1/3

SAMV\_11 ha-318

May 4 2011

HA-318

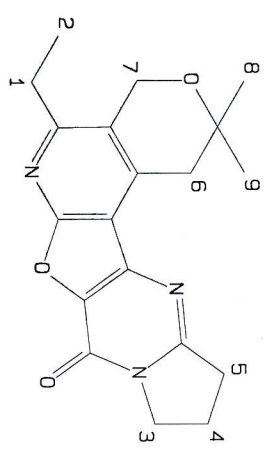

C<sub>19</sub>H<sub>21</sub>N<sub>3</sub>O<sub>3</sub>

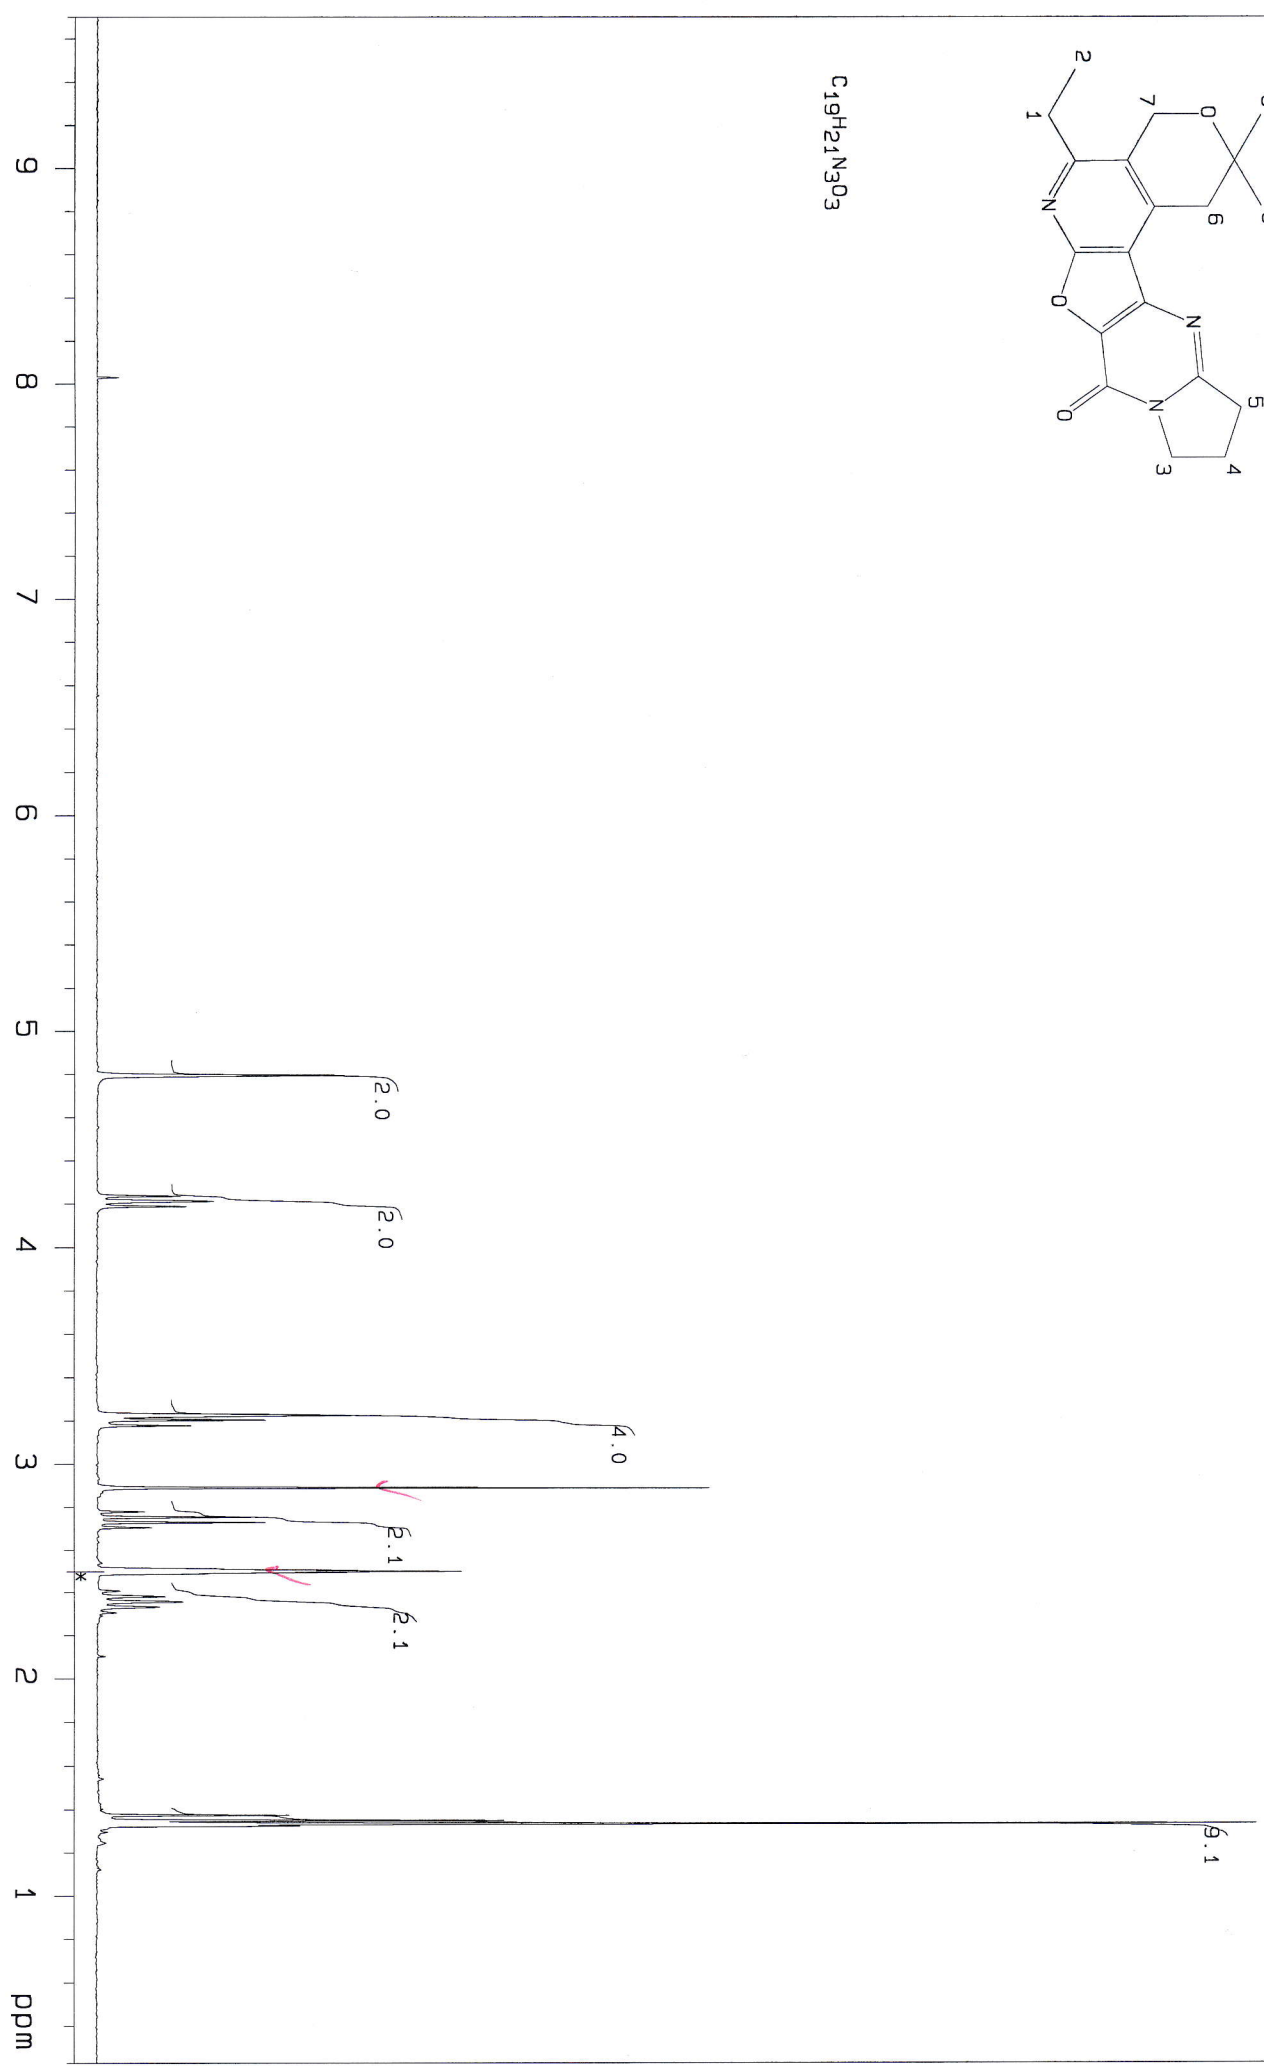

+

4f

Molecular Structure Research Centre, Yerevan, Armenia, Varian Mercury-300VX

HA-318

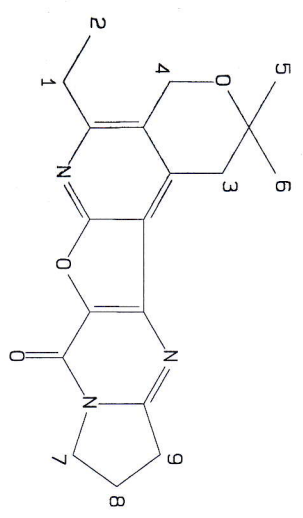

C<sub>19</sub>H<sub>21</sub>N<sub>3</sub>O<sub>3</sub>

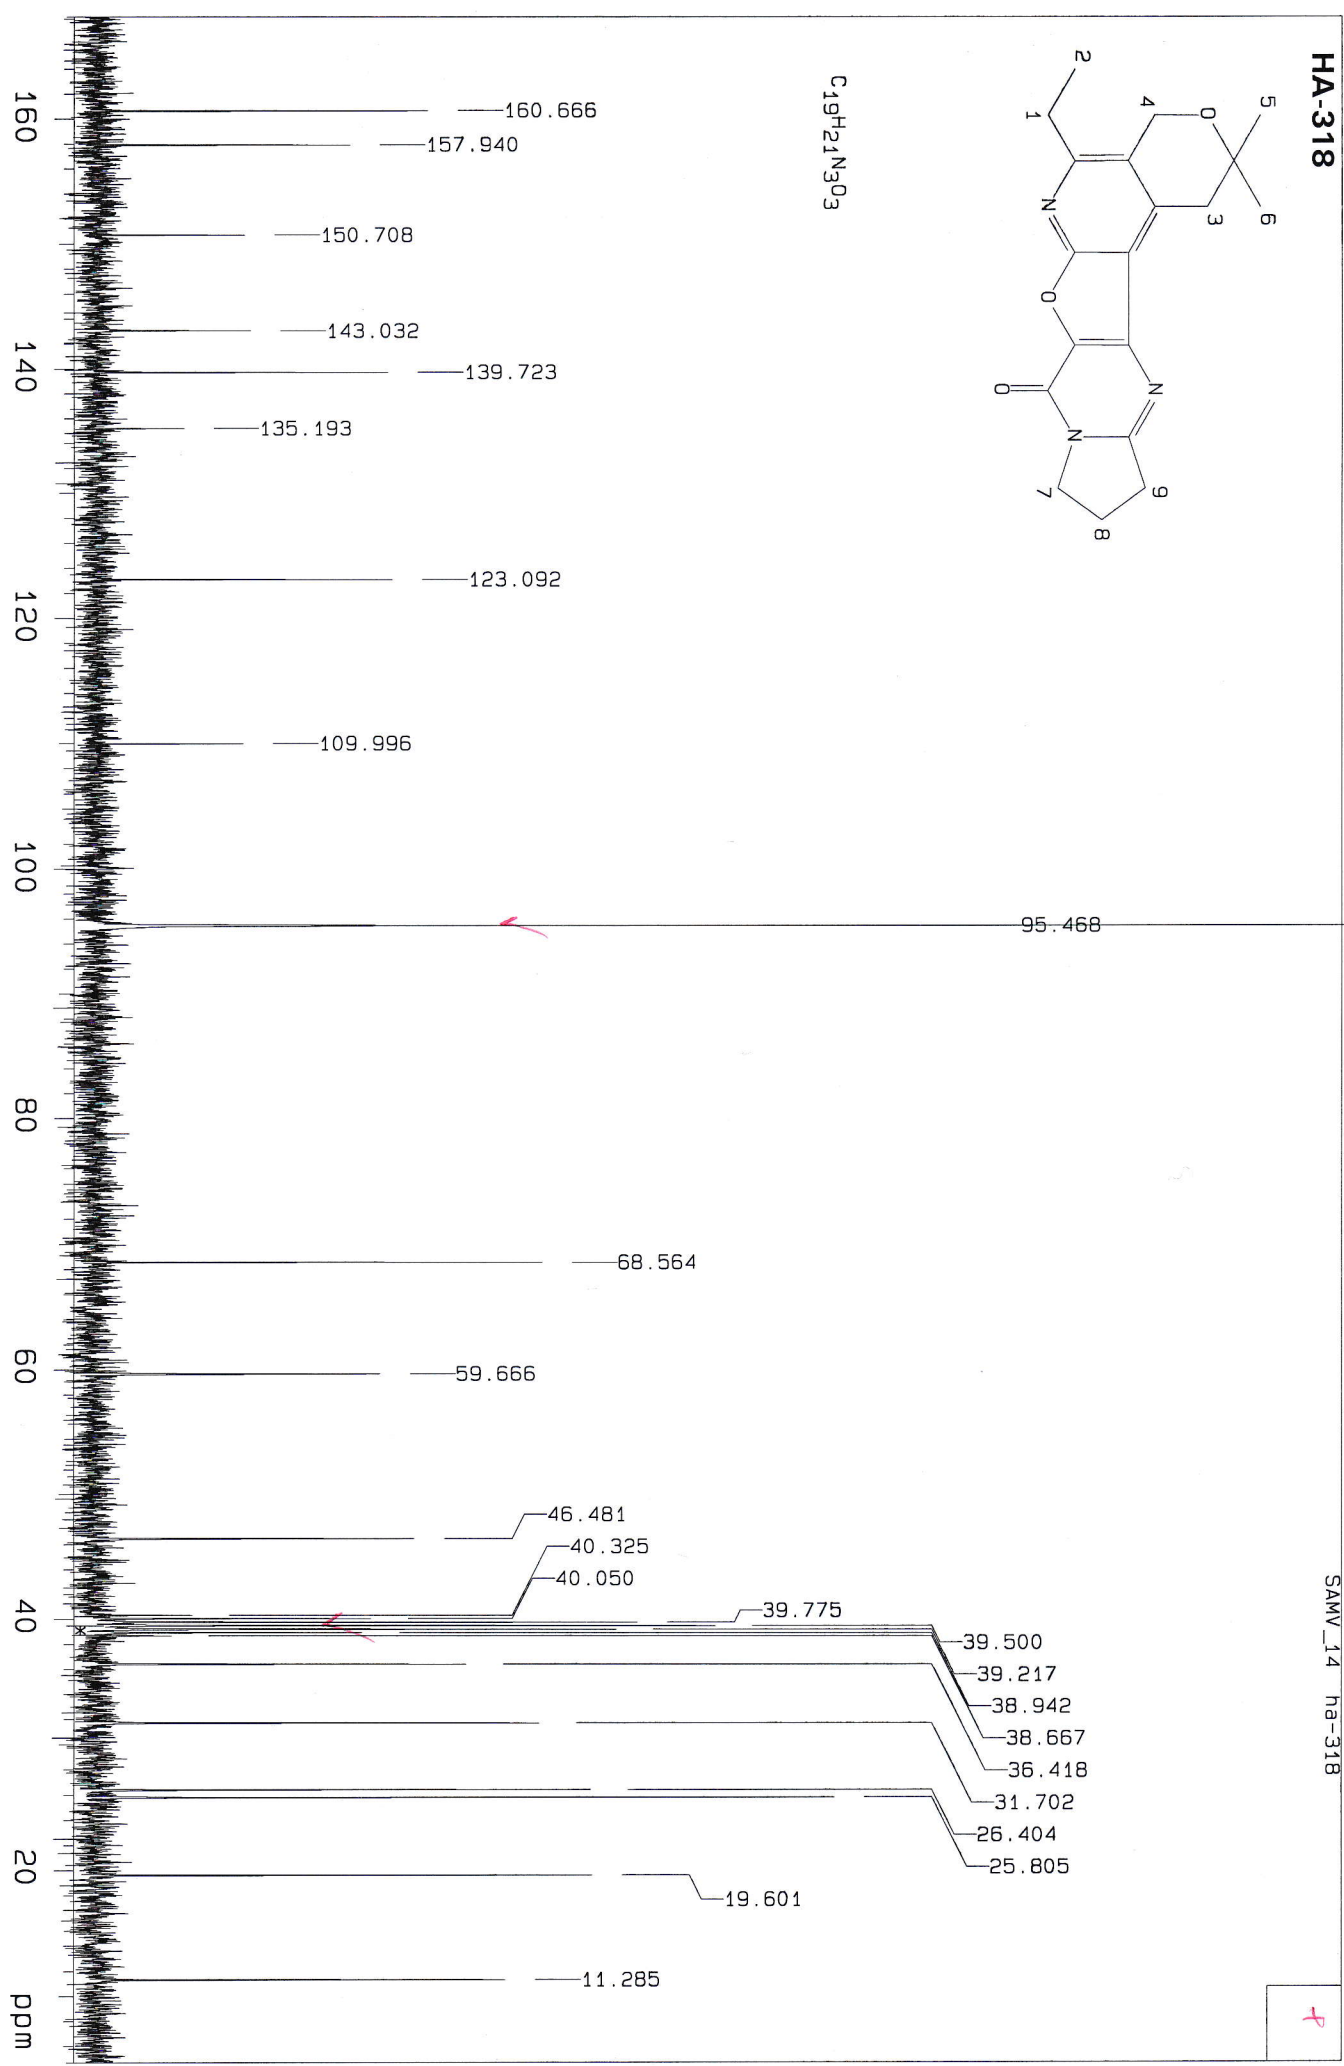

C13 75.462 MHz, nt=464, mp = 19998, temp = 30.0 C, lb = 1.0, solvent = DMSO-C14-13

SAMV\_14 ha-318

Oct 21 2014

+

49

HA-455

SAMV\_11 ha-455

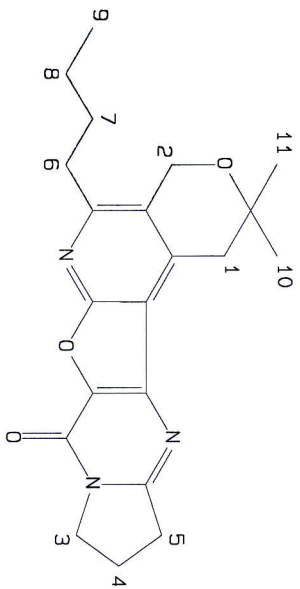

C<sub>21</sub>H<sub>25</sub>N<sub>3</sub>O<sub>3</sub>

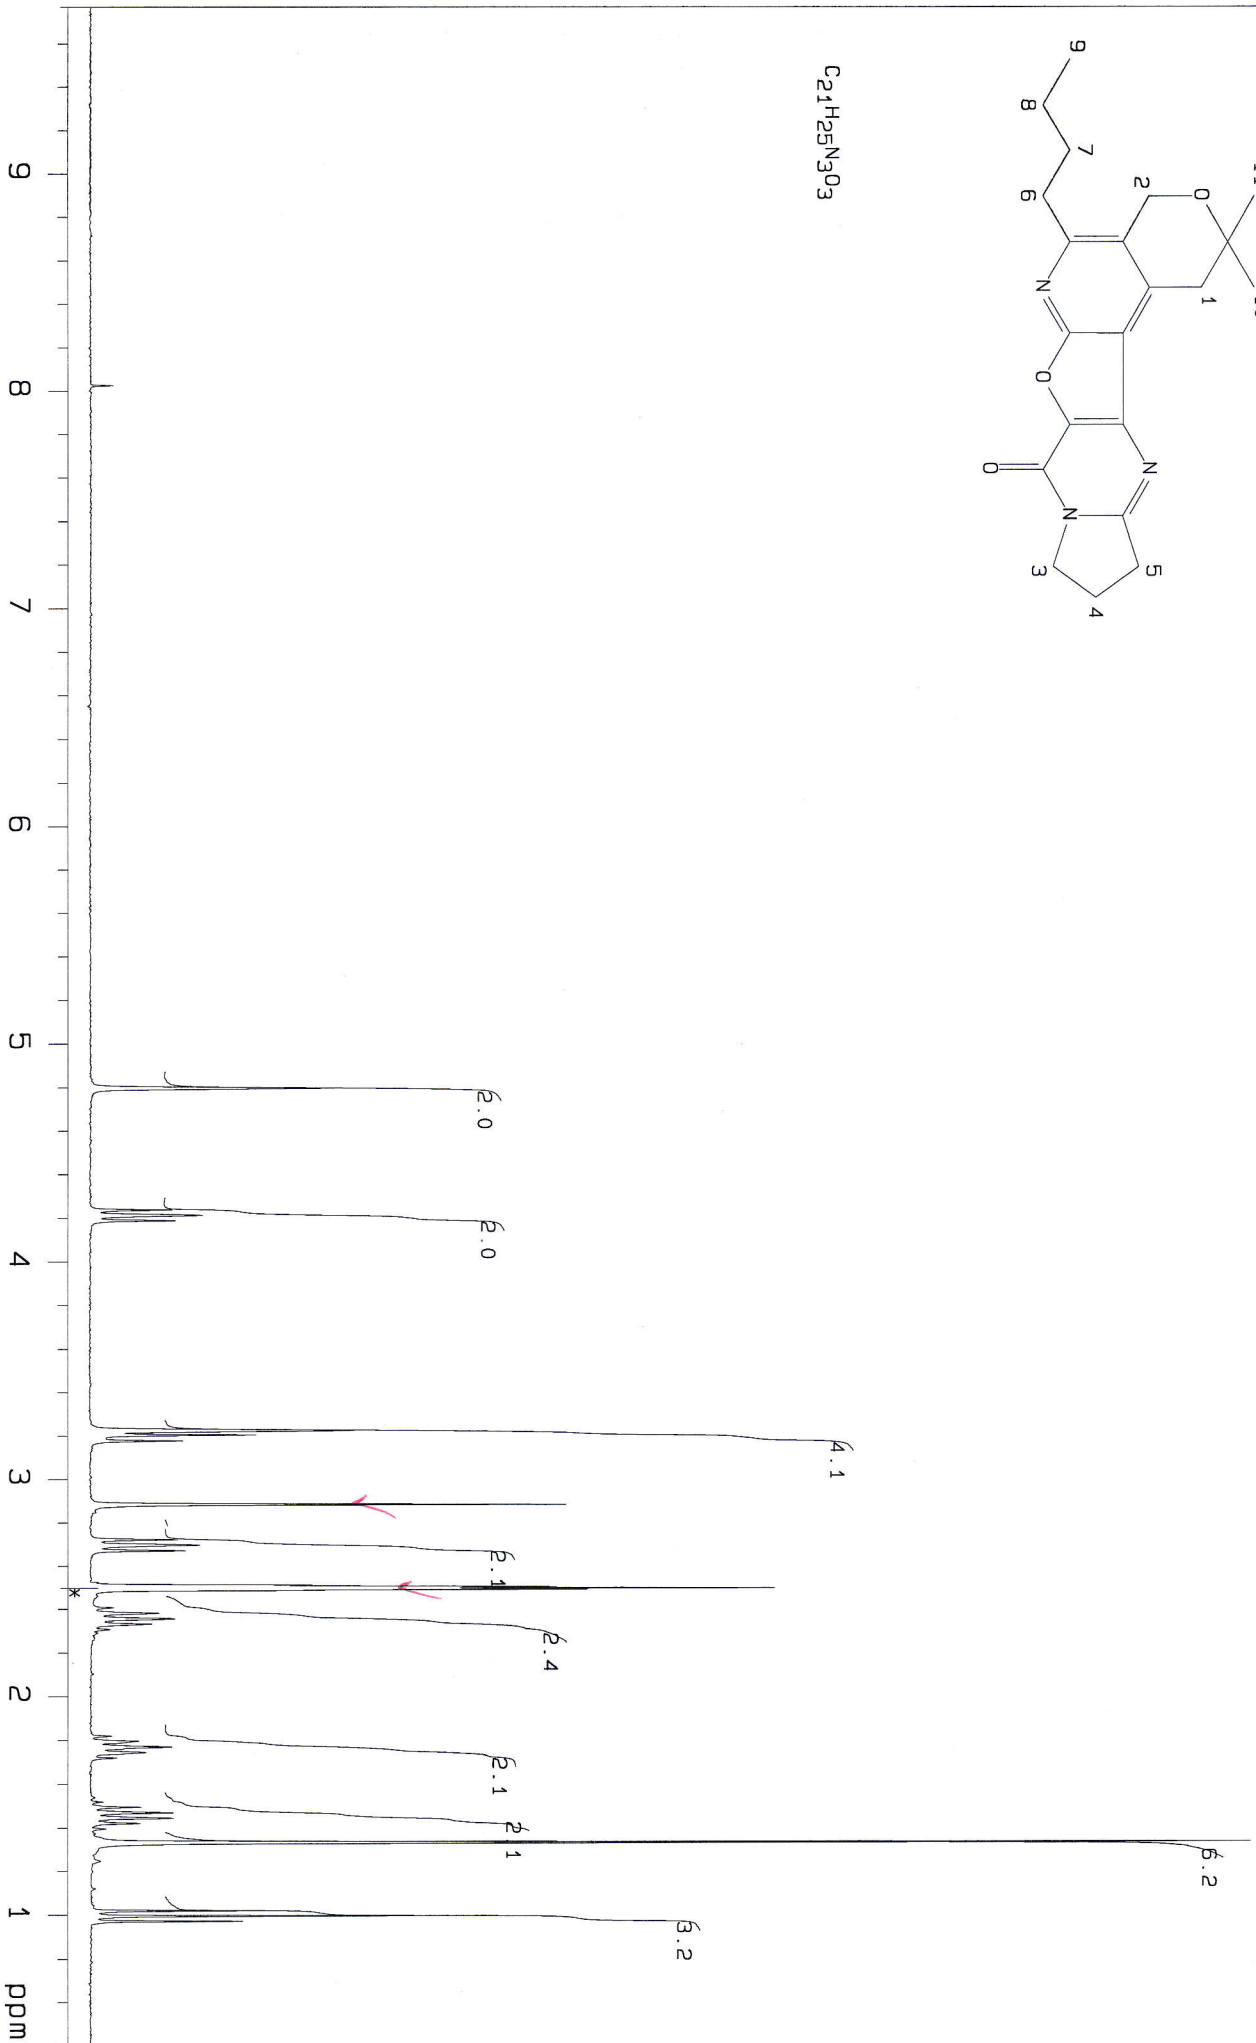

4

49

HA-455  
Molecular Structure Research Centre, Yerevan, Armenia, Varian Mercury-300VX

C13 75.462 MHz, nt = 1008, np = 19998, temp = 30.0 C, lb = 1.0, solvent = DMSO/CCl4 1/3

SAMV\_14 ha-455

Oct 21 2014

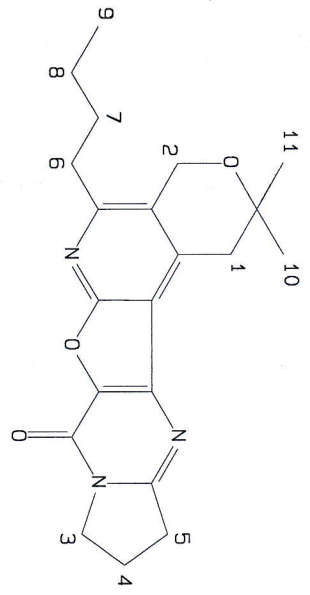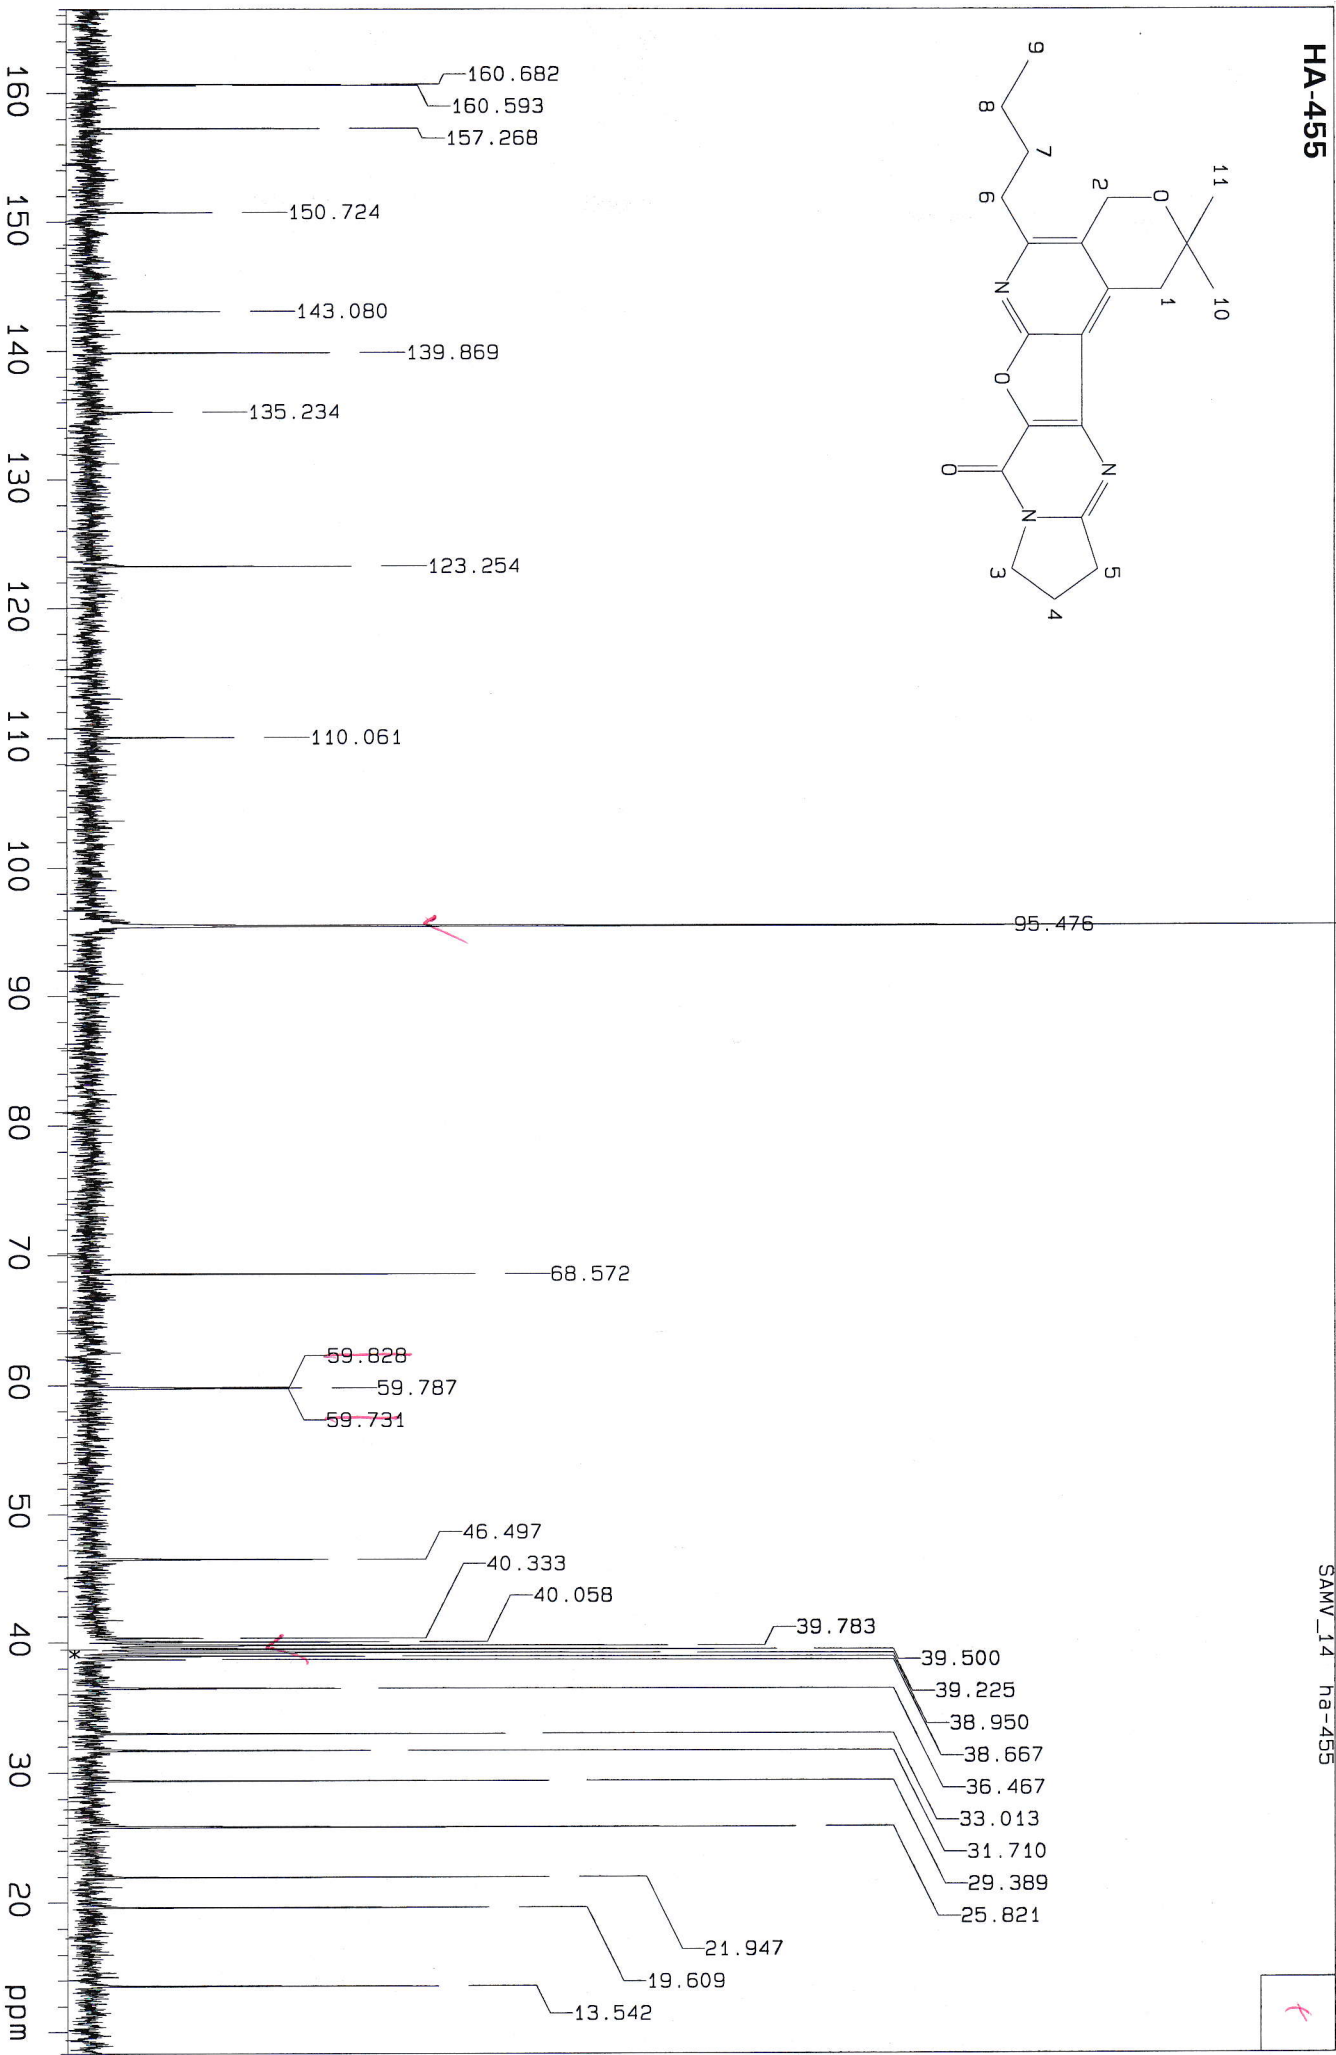

+

4h

Molecular Structure Research Centre, Yerevan, Armenia, Varian Mercury-300VX

H1 300.077 MHz, n = 16, np = 16000, temp = 30.0 C, lb = -0.2, solvent = DMSO/Cd4 1/3

SAMV\_11 na-450

Oct 20 2011

HA-450

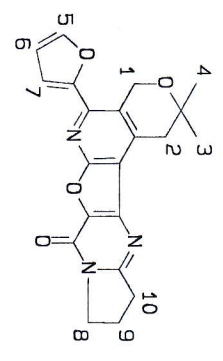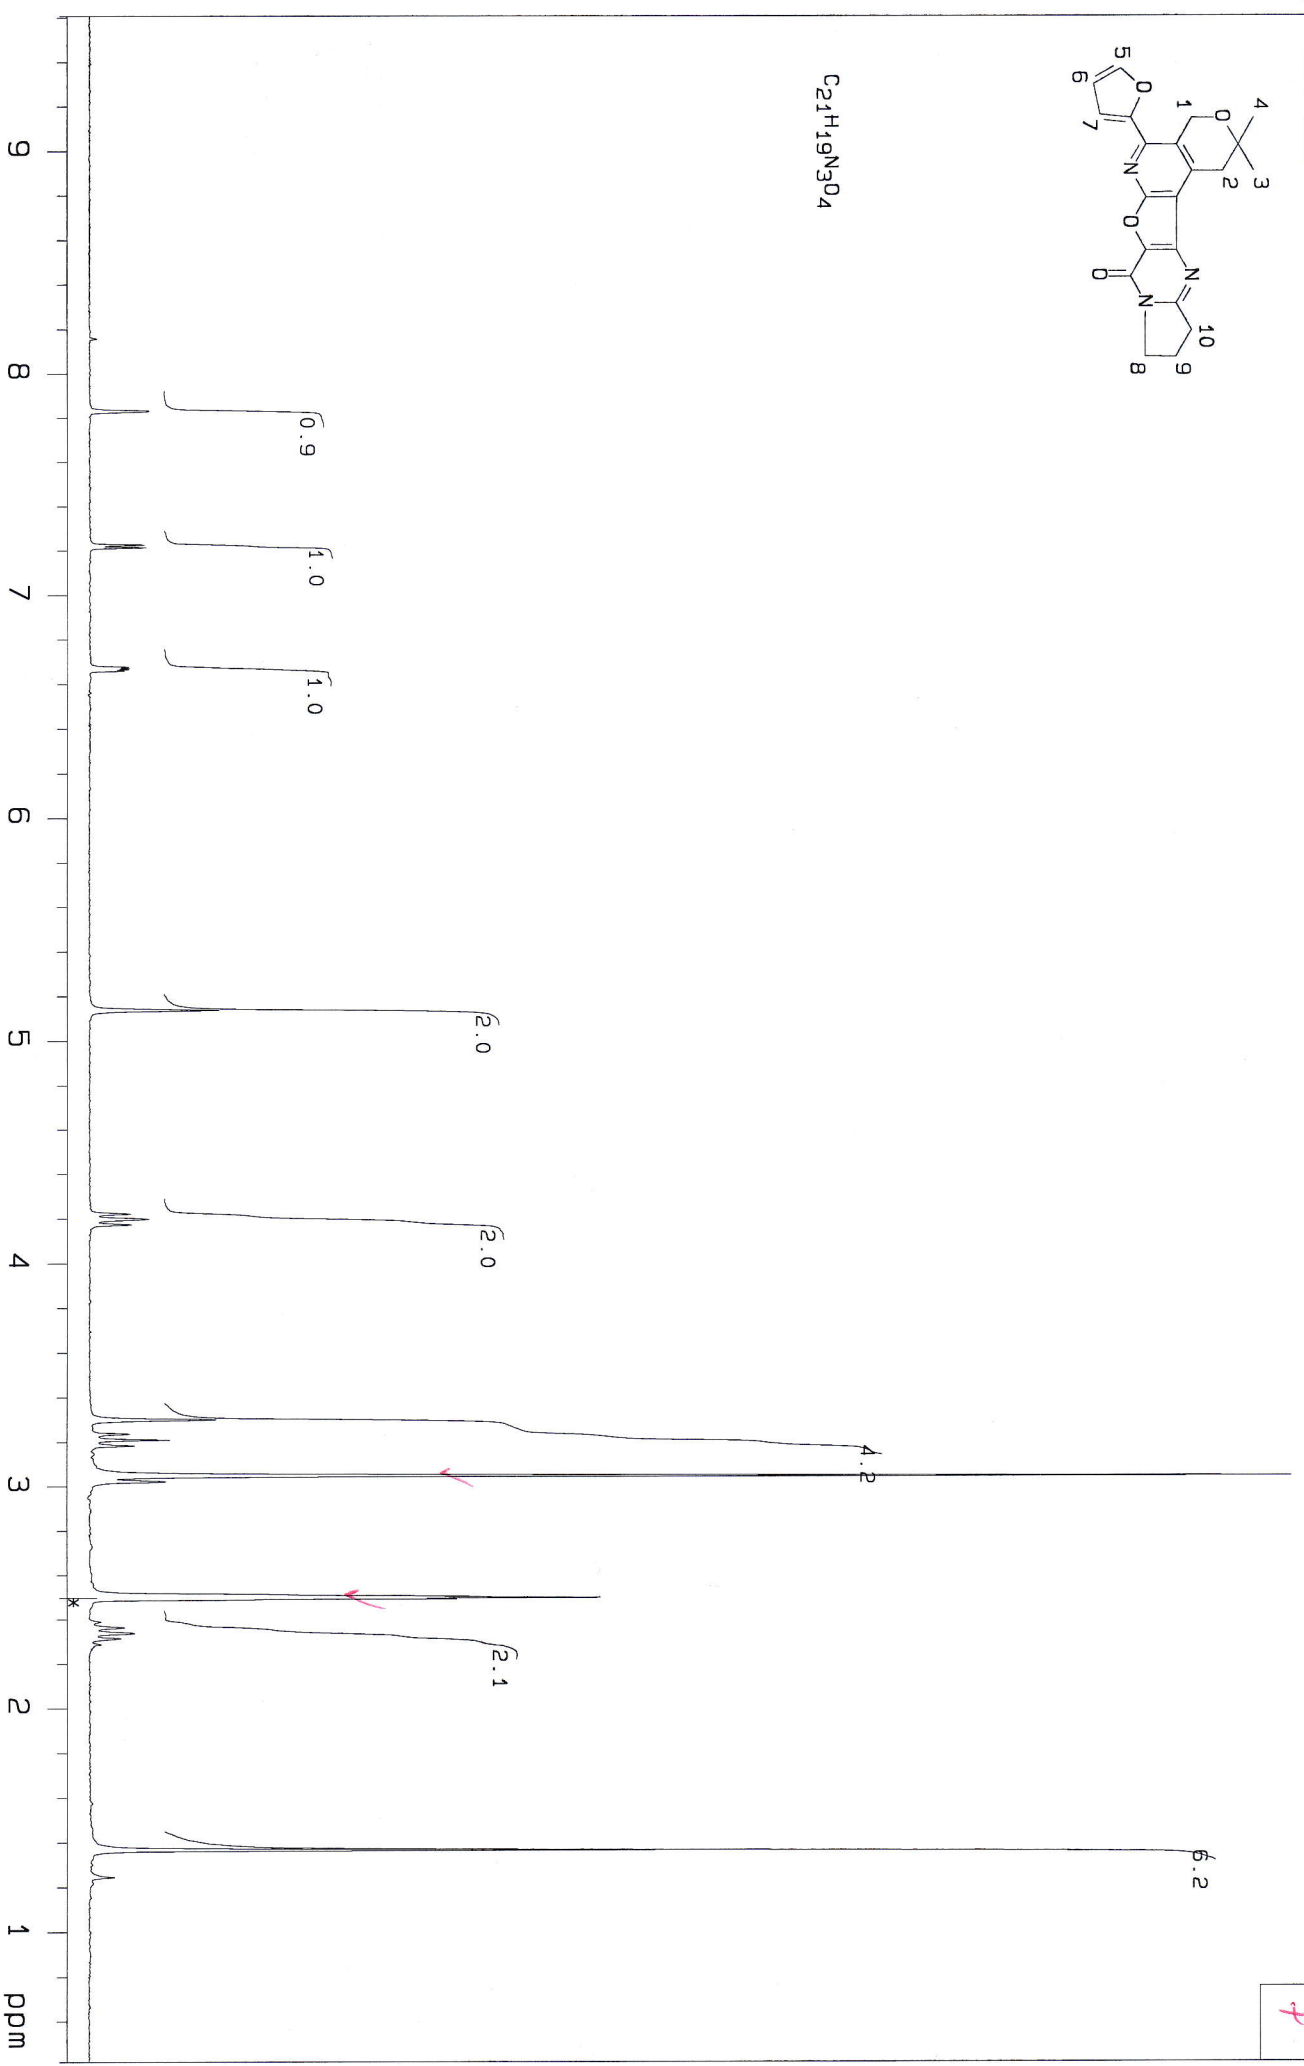

C<sub>21</sub>H<sub>19</sub>N<sub>3</sub>O<sub>4</sub>

4

5a

Molecular Structure Research Centre, Yerevan, Armenia, Varian Mercury-300VX

H1 300.077 MHz, nt=16, np=16000, temp=30.0 C, lb=-0.2, solvent=DMSO-CD4 1/3

HA-654

SAMV\_12 ha-654

Apr 6 2012

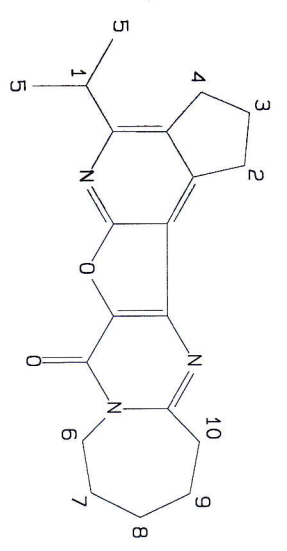

$C_{20}H_{23}N_3O_2$

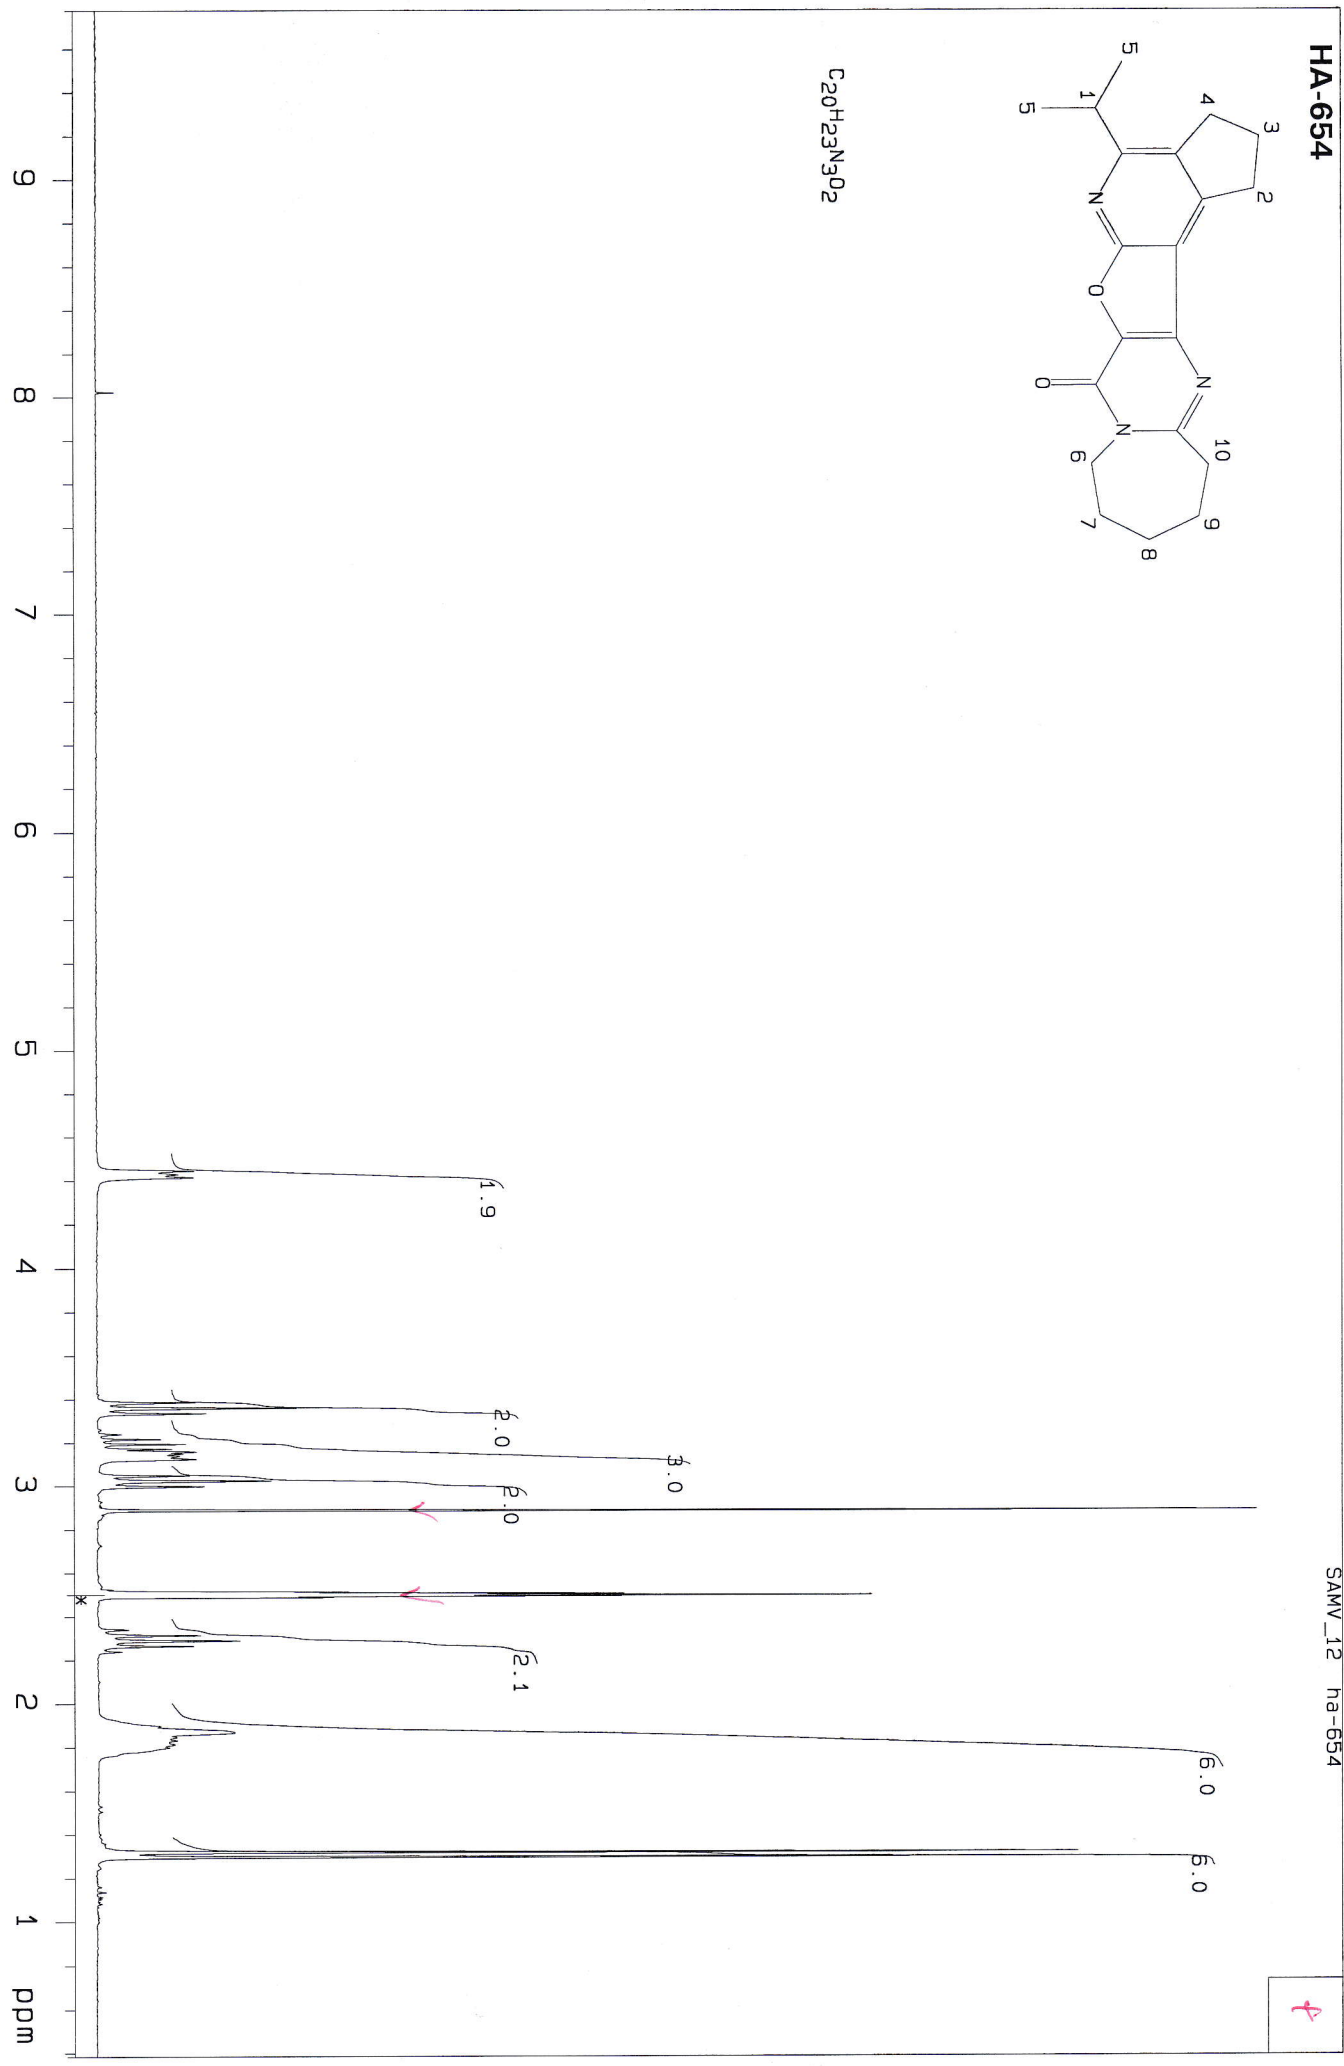

Apr 6 2012

5a

HA-654

Molecular Structure Research Centre, Yerevan, Armenia, Varian Mercury-300VX

C13 75.462 MHz, nt=256, np=19998, temp=30.0 C, lb=1.0, solvent=DMSO/C14\_1/3

SAMV\_12 ha-654

Oct 22 2014

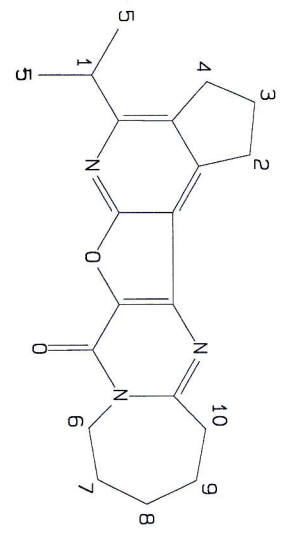

C<sub>20</sub>H<sub>23</sub>N<sub>3</sub>O<sub>2</sub>

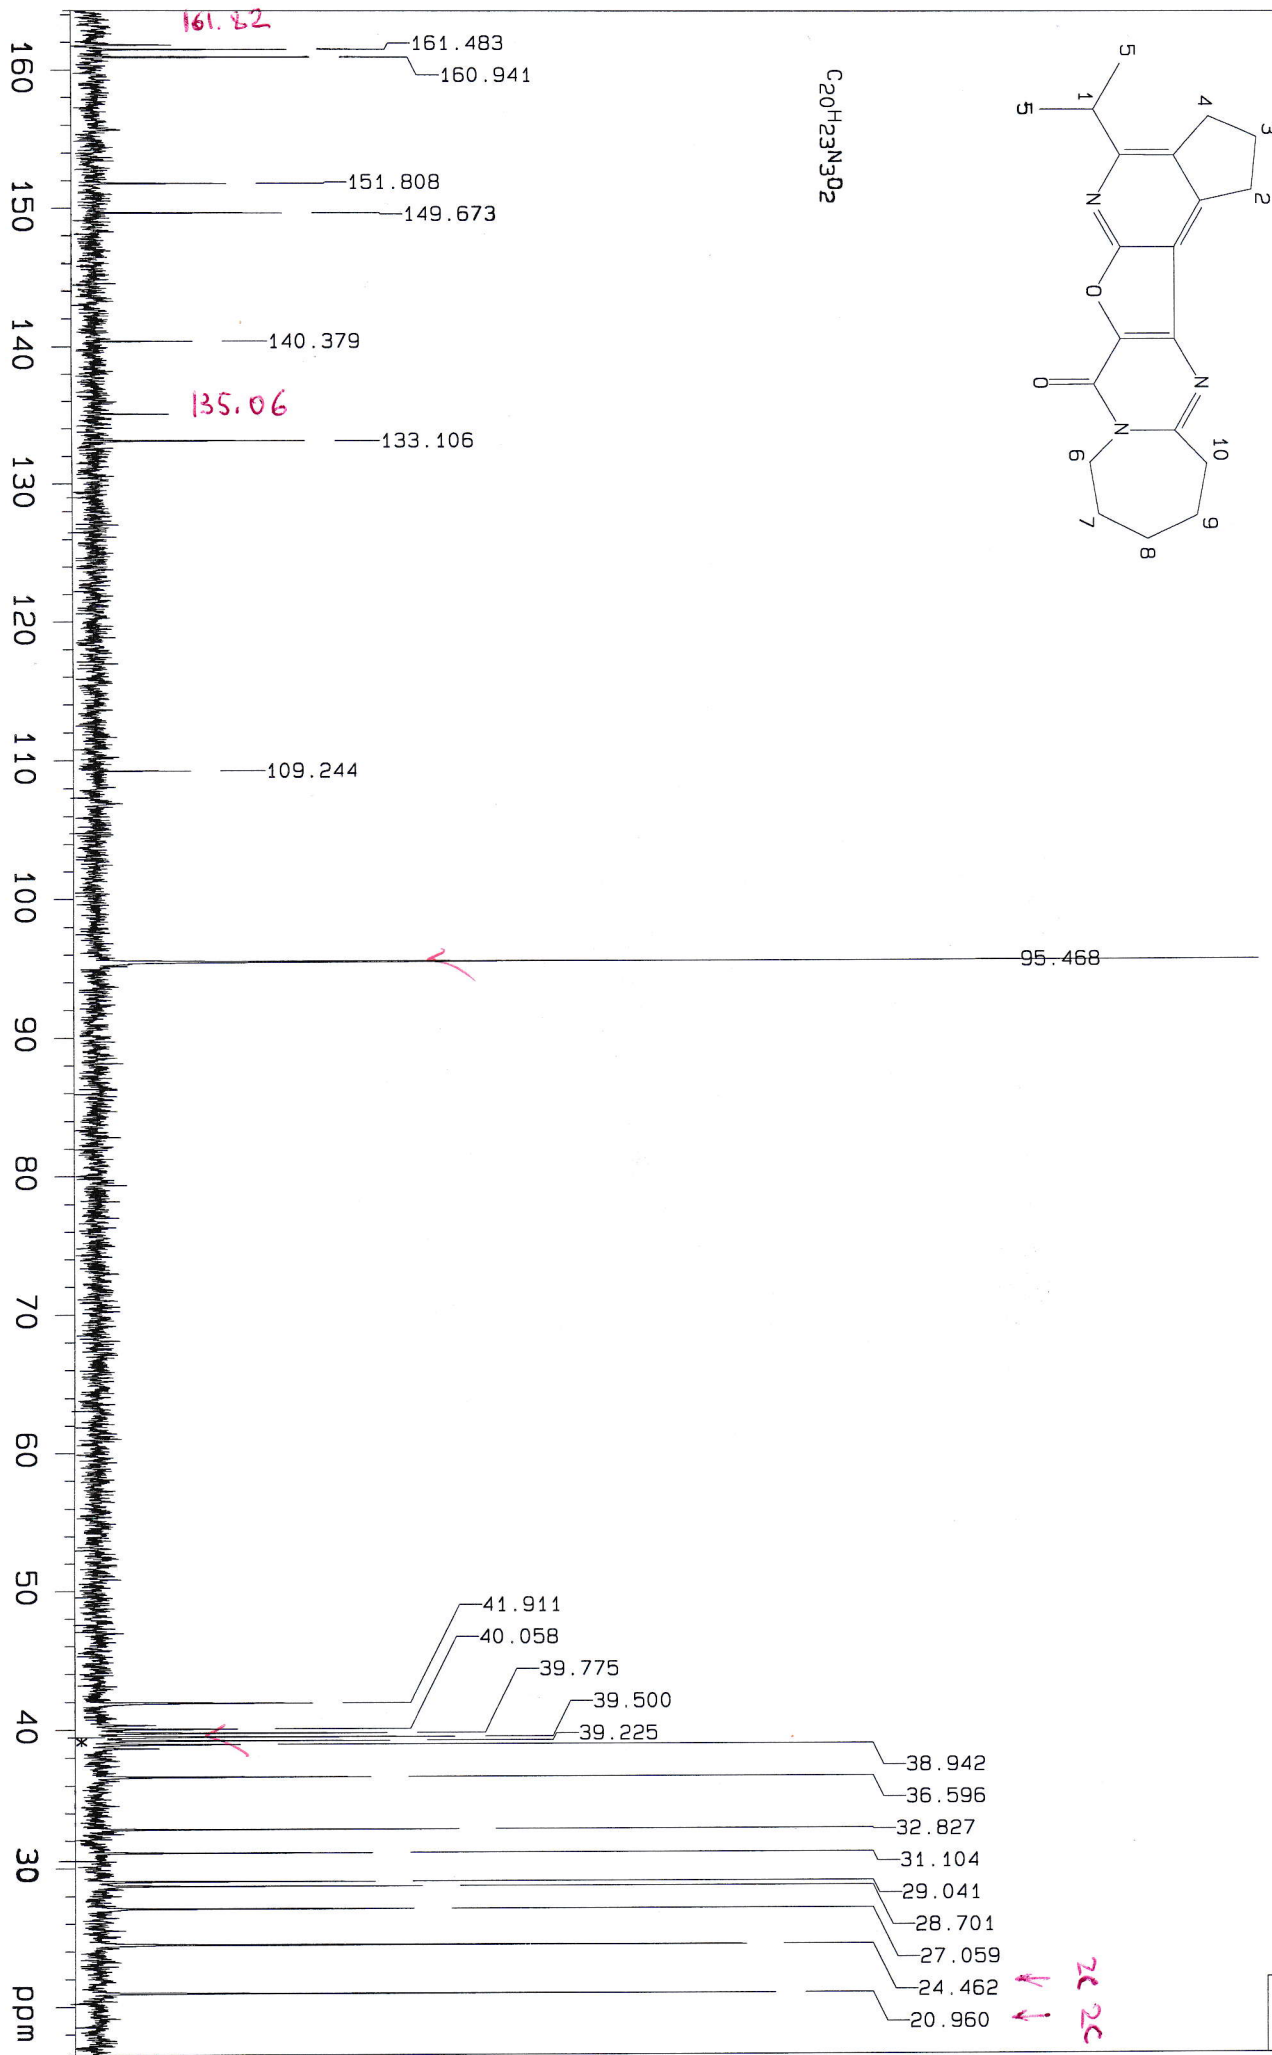

+



56

Molecular Structure Research Centre, Yerevan, Armenia, Varian Mercury-300VX

H1 300.077 MHz, nt = 16, np = 16000, temp = 30.0 C, lb = -0.2, solvent = DMSO/CD4 1/3

Jan 17 2012

HA-554

NOCT\_12 ha-554

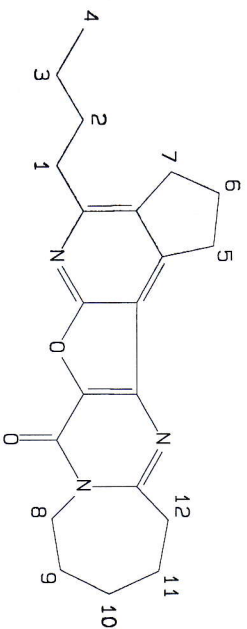

C<sub>21</sub>H<sub>25</sub>N<sub>3</sub>O<sub>2</sub>

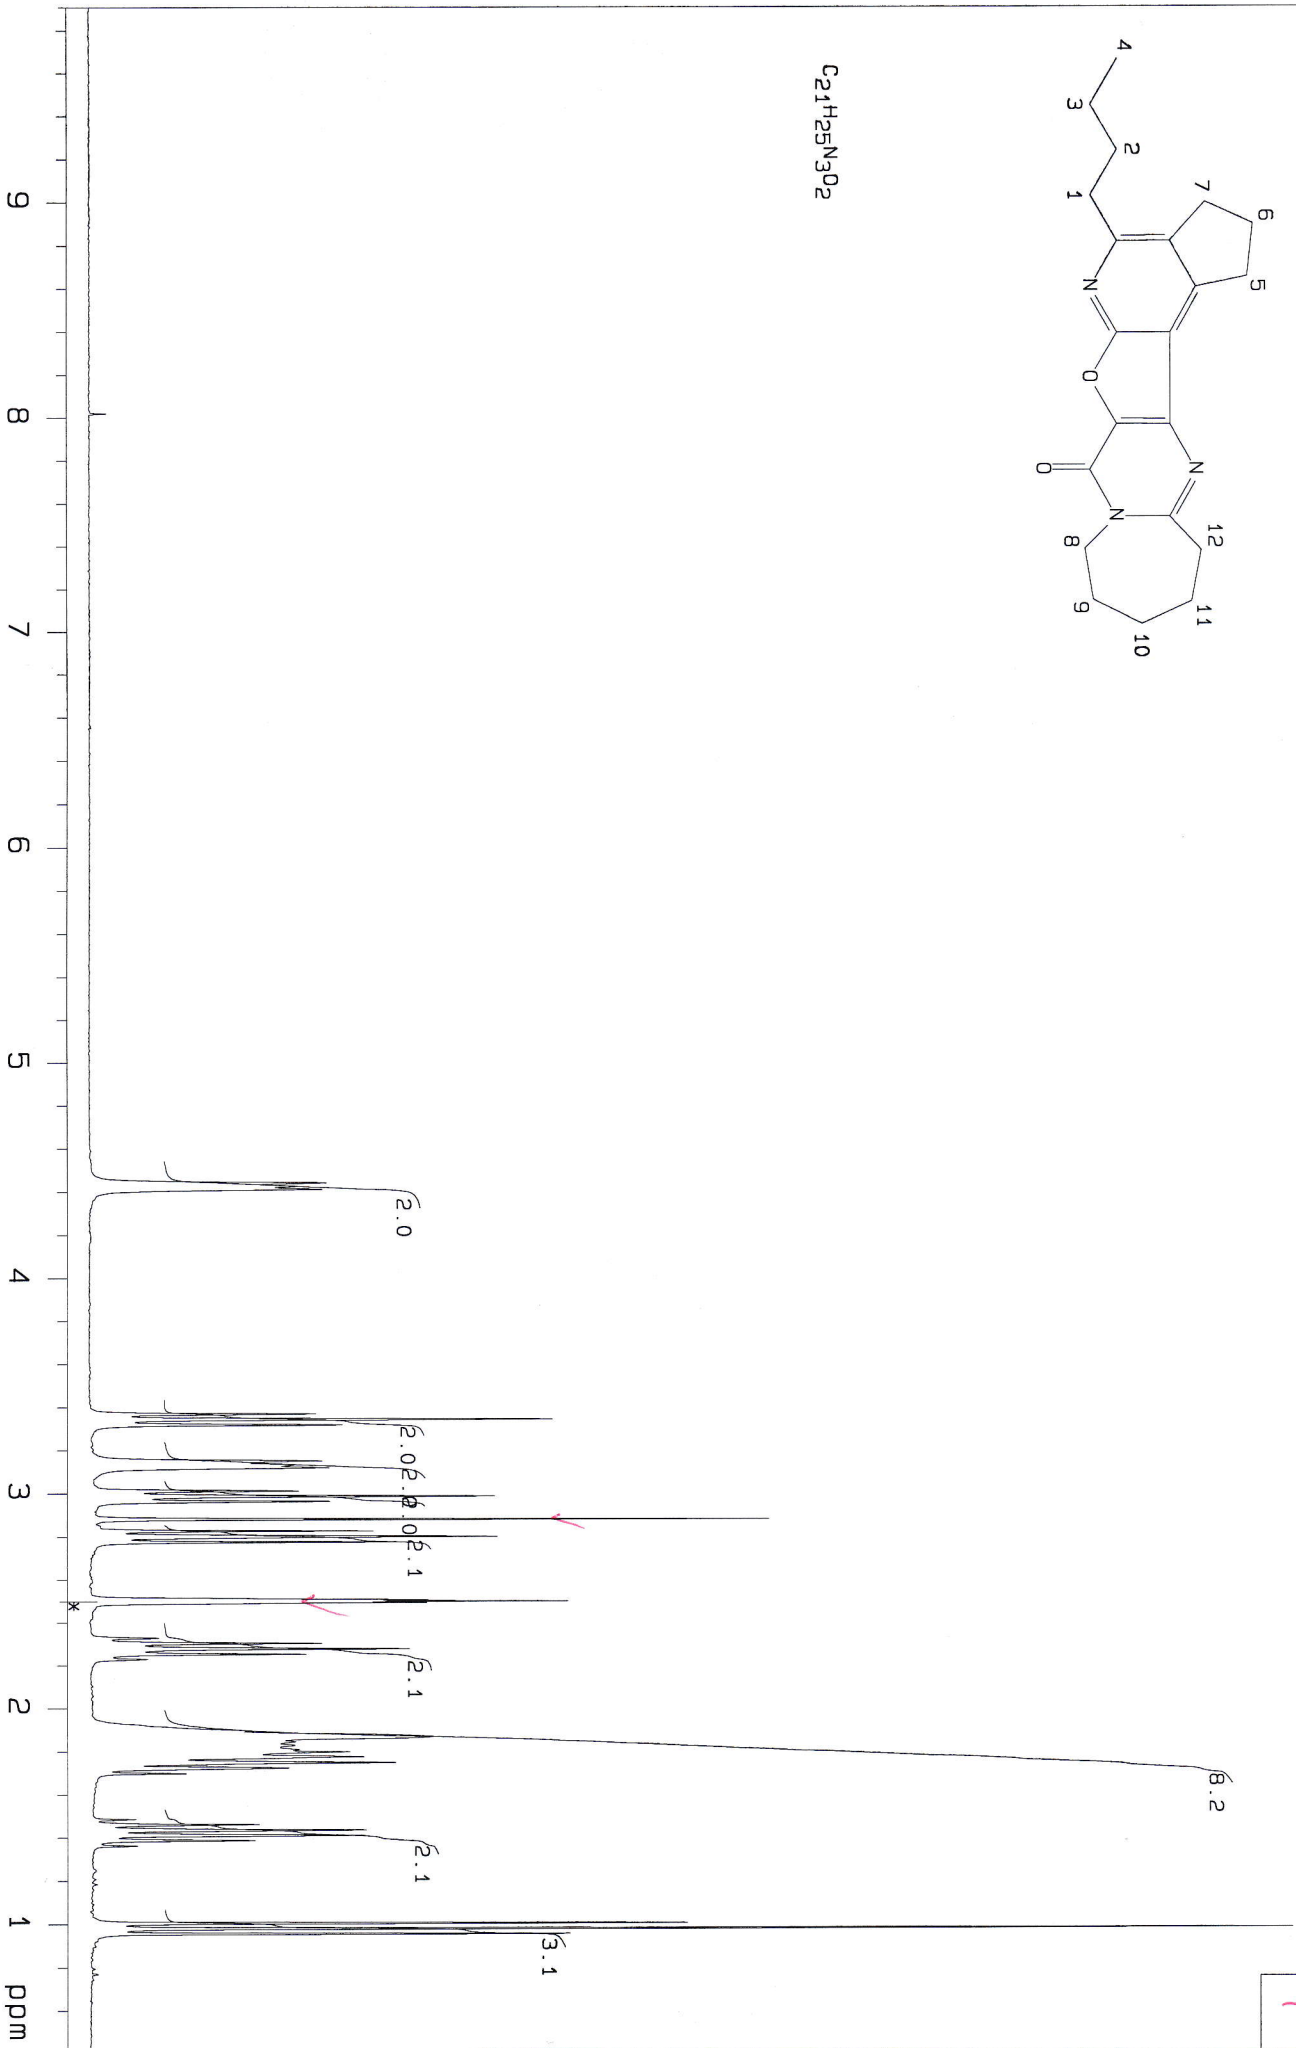



56

Molecular Structure Research Centre, Yerevan, Armenia, Varian Mercury-300VX  
HA-554

C13 75.462 MHz, nt = 192, np = 19998, temp = 30.0 C, lb = 1.0, solvent = DMSO/C14 1/3  
SAMV\_14 ha-554

Oct 21 2014

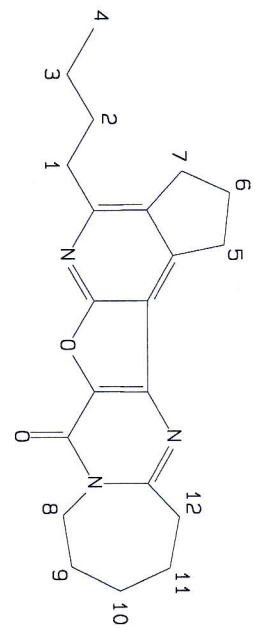

C<sub>21</sub>H<sub>25</sub>N<sub>3</sub>O<sub>2</sub>

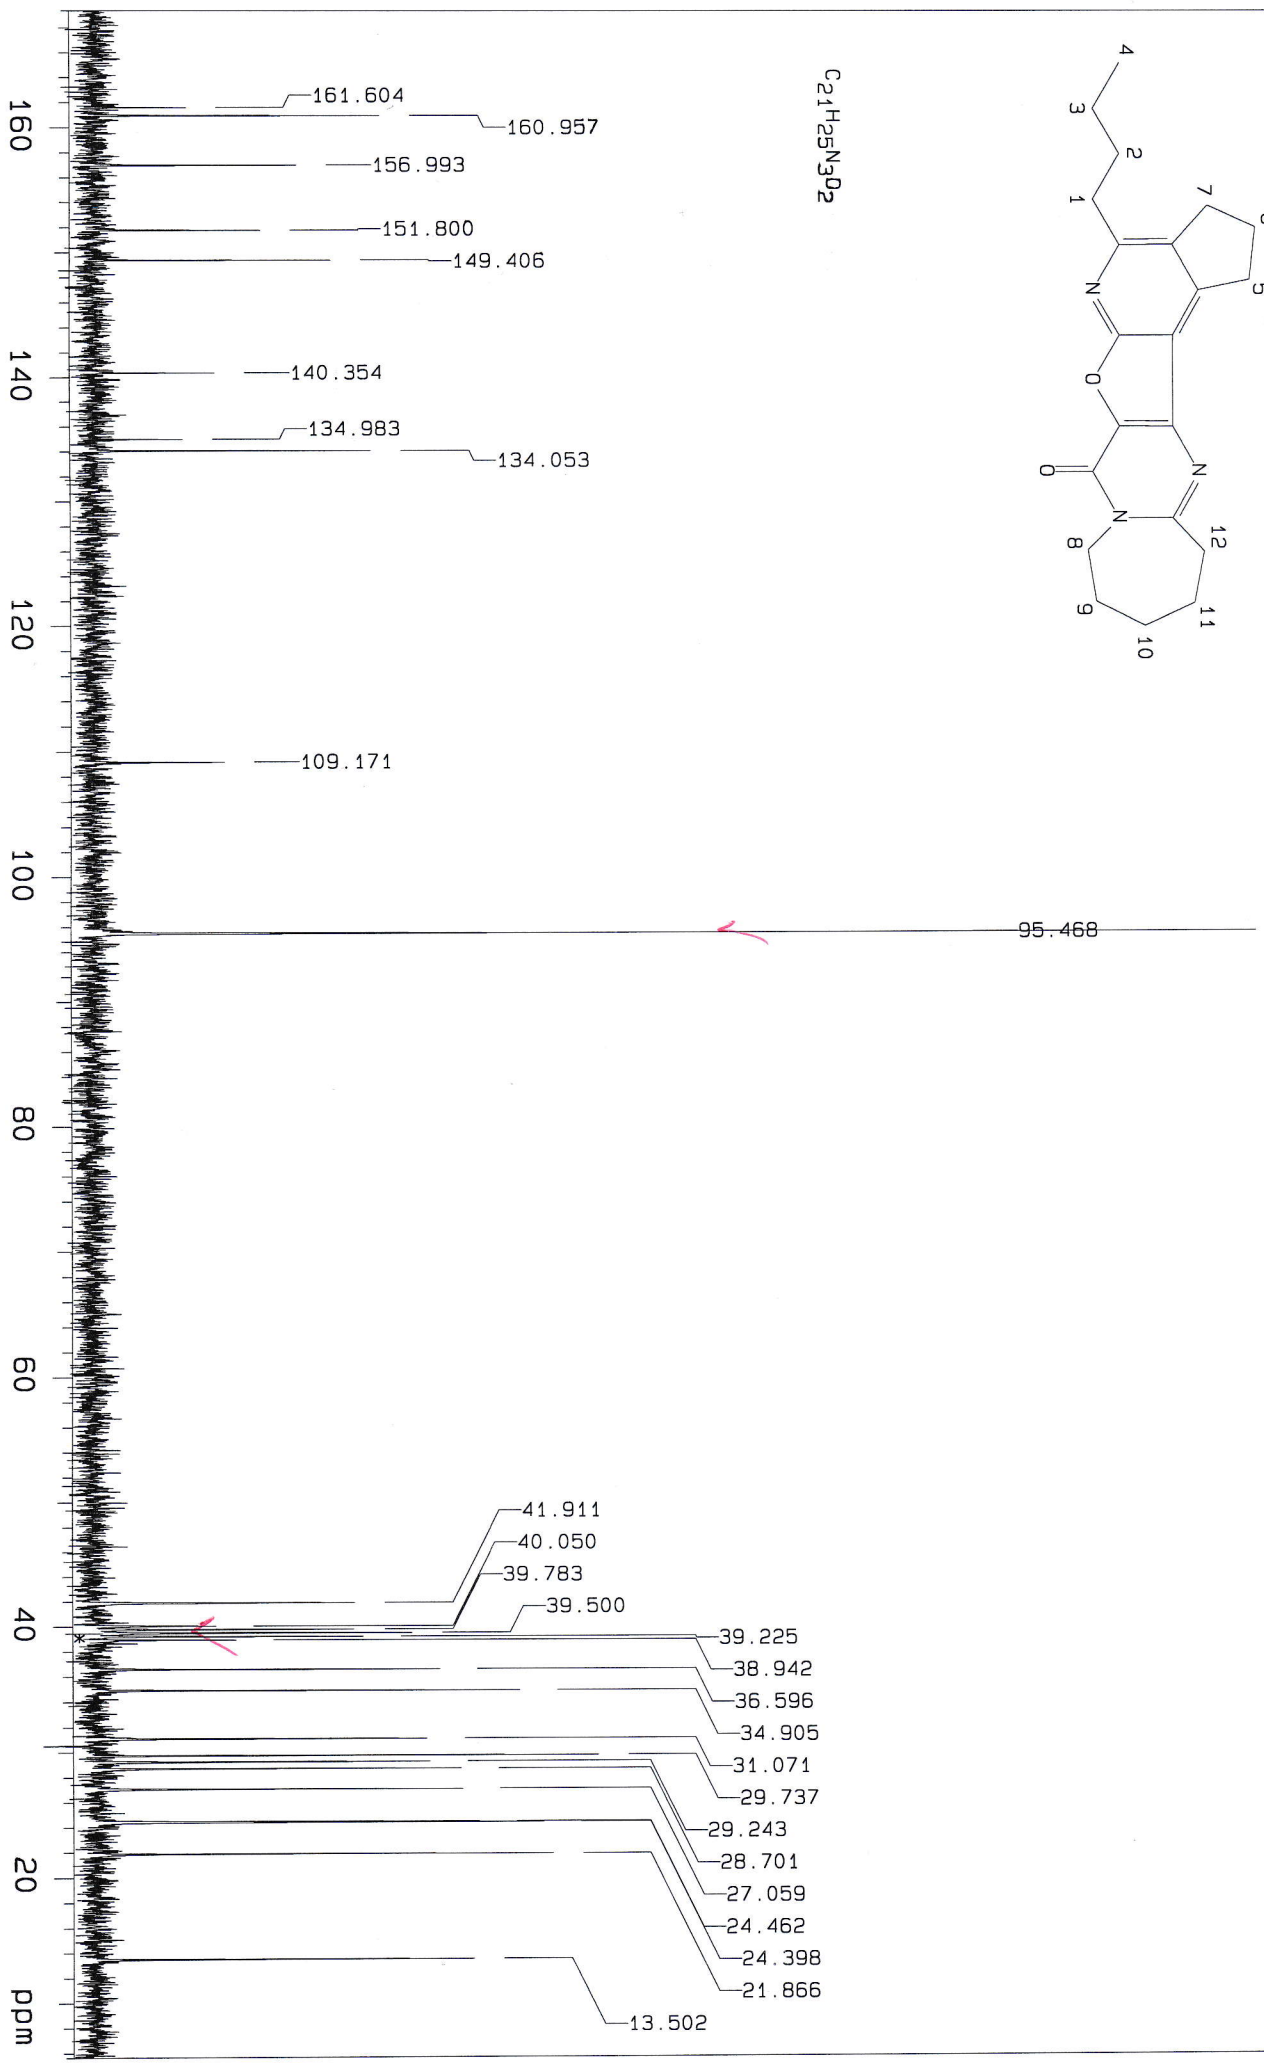

5c

*[Handwritten signature]*

Molecular Structure Research Centre, Yerevan, Armenia, Varian Mercury-300VX

H1 300.077 MHz, nt = 16, np = 16000, temp = 30.0 C, lb = -0.2, solvent = DMSO/CD4 1/3

Dec 26 2011

HA-553

SAMV\_11 ha-553

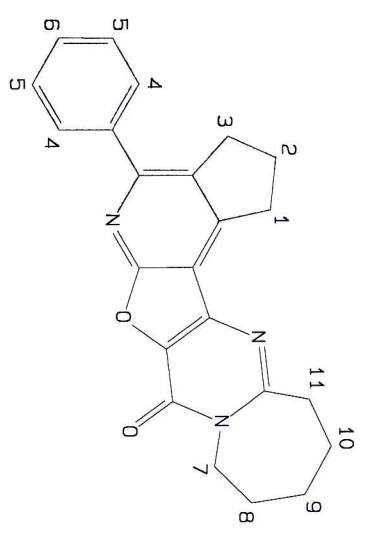

C<sub>23</sub>H<sub>21</sub>N<sub>3</sub>O<sub>2</sub>

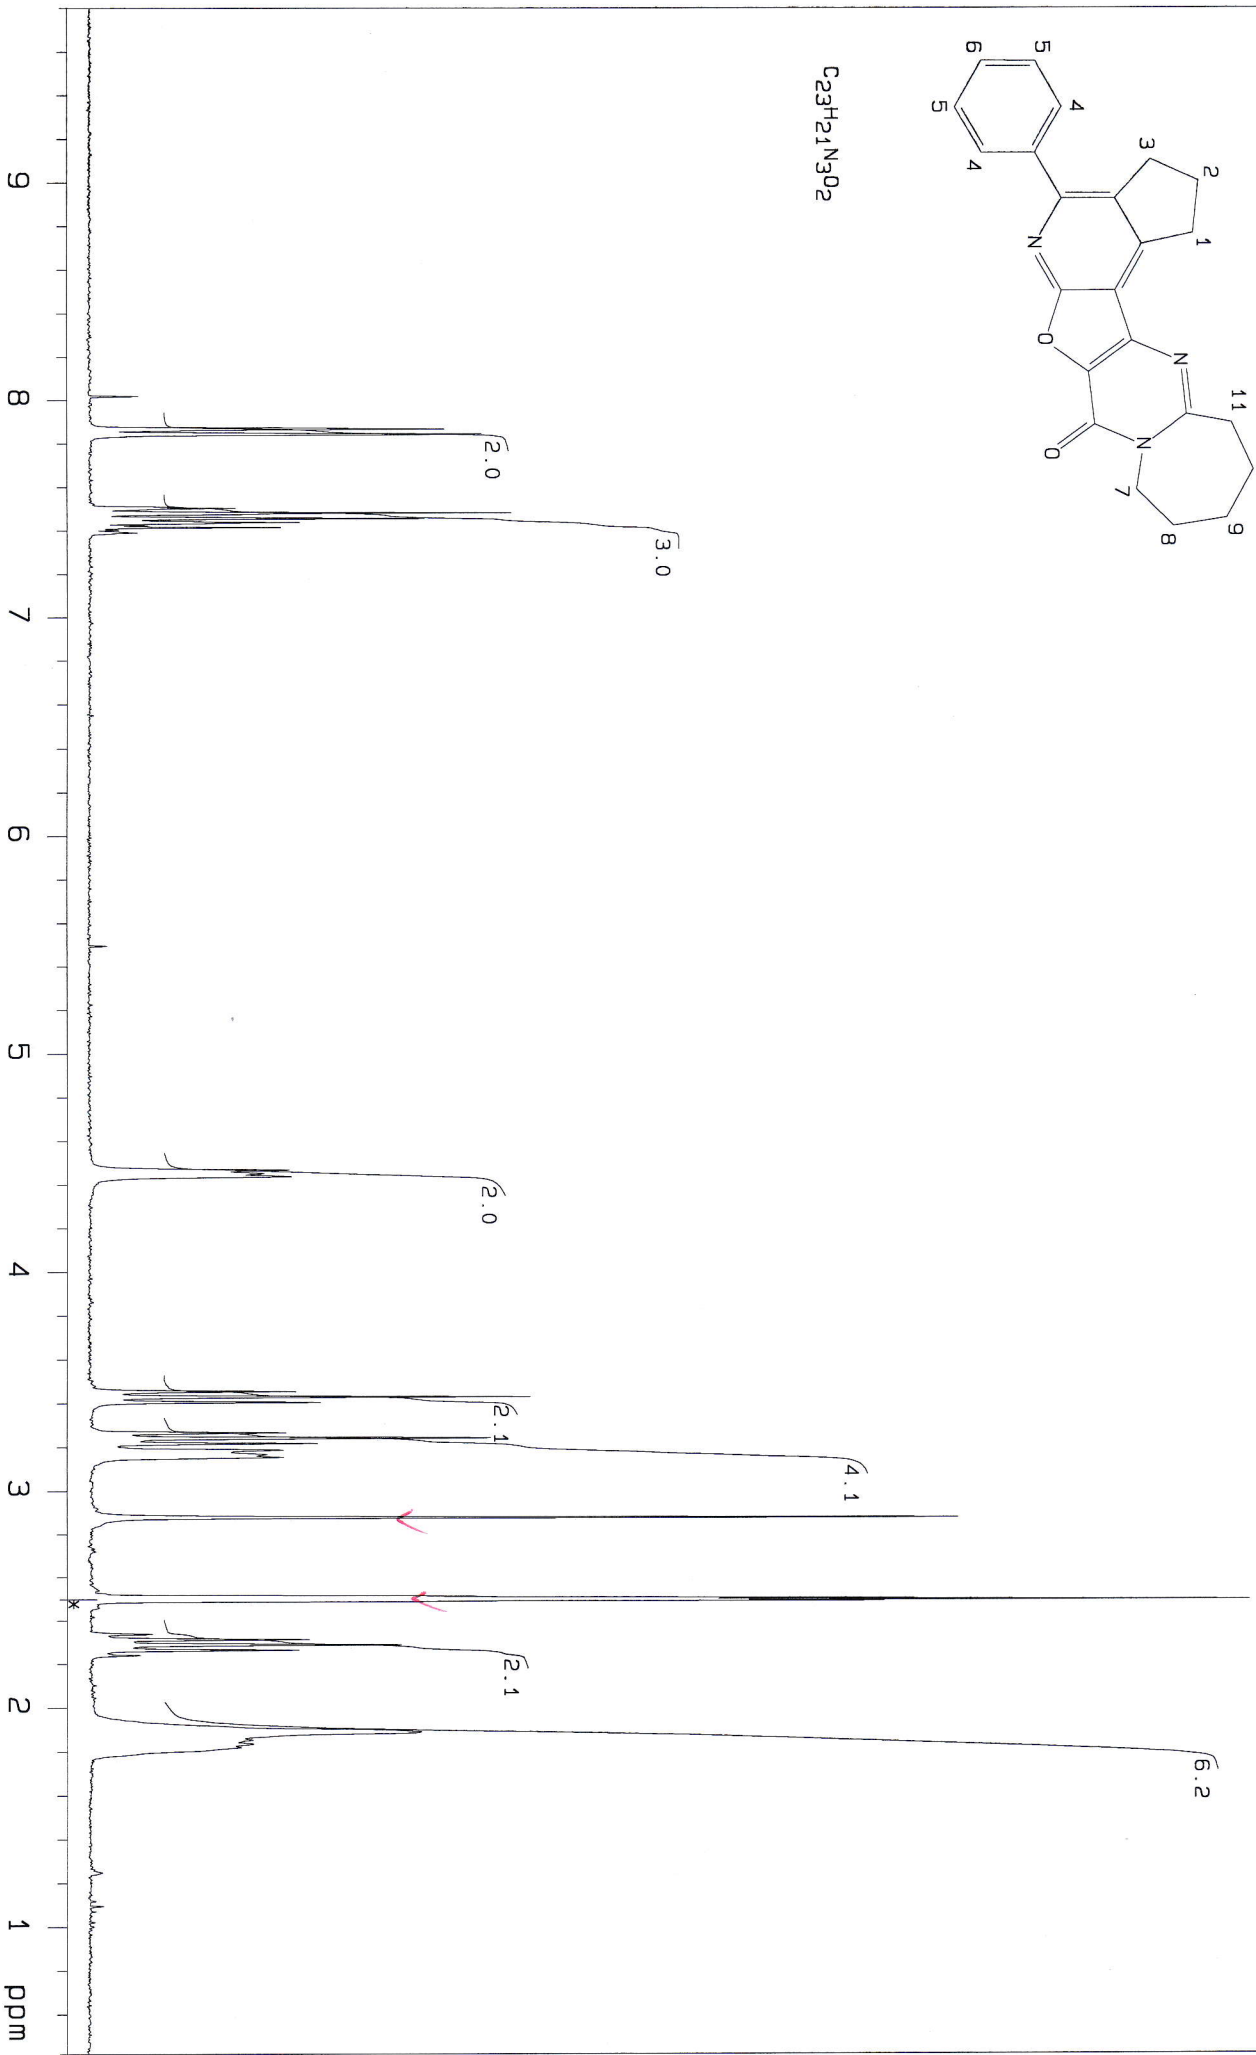

5c

HA-553

Molecular Structure Research Centre, Yerevan, Armenia, Varian Mercury-300VX

C13 75.462 MHz, nt=720, mp=19998, temp=30.0 C, lb=1.0, solvent=DMSO/CD4 1/3

SAMV\_11 ha-553

Oct 22 2014

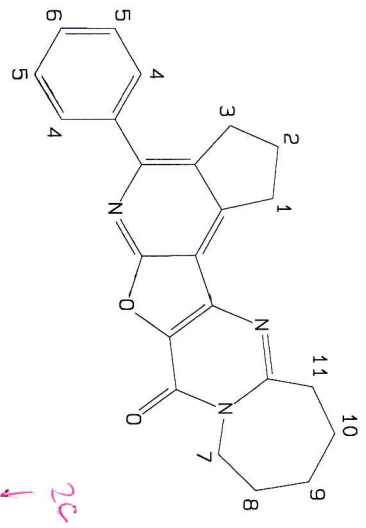

C<sub>23</sub>H<sub>21</sub>N<sub>3</sub>O<sub>2</sub>

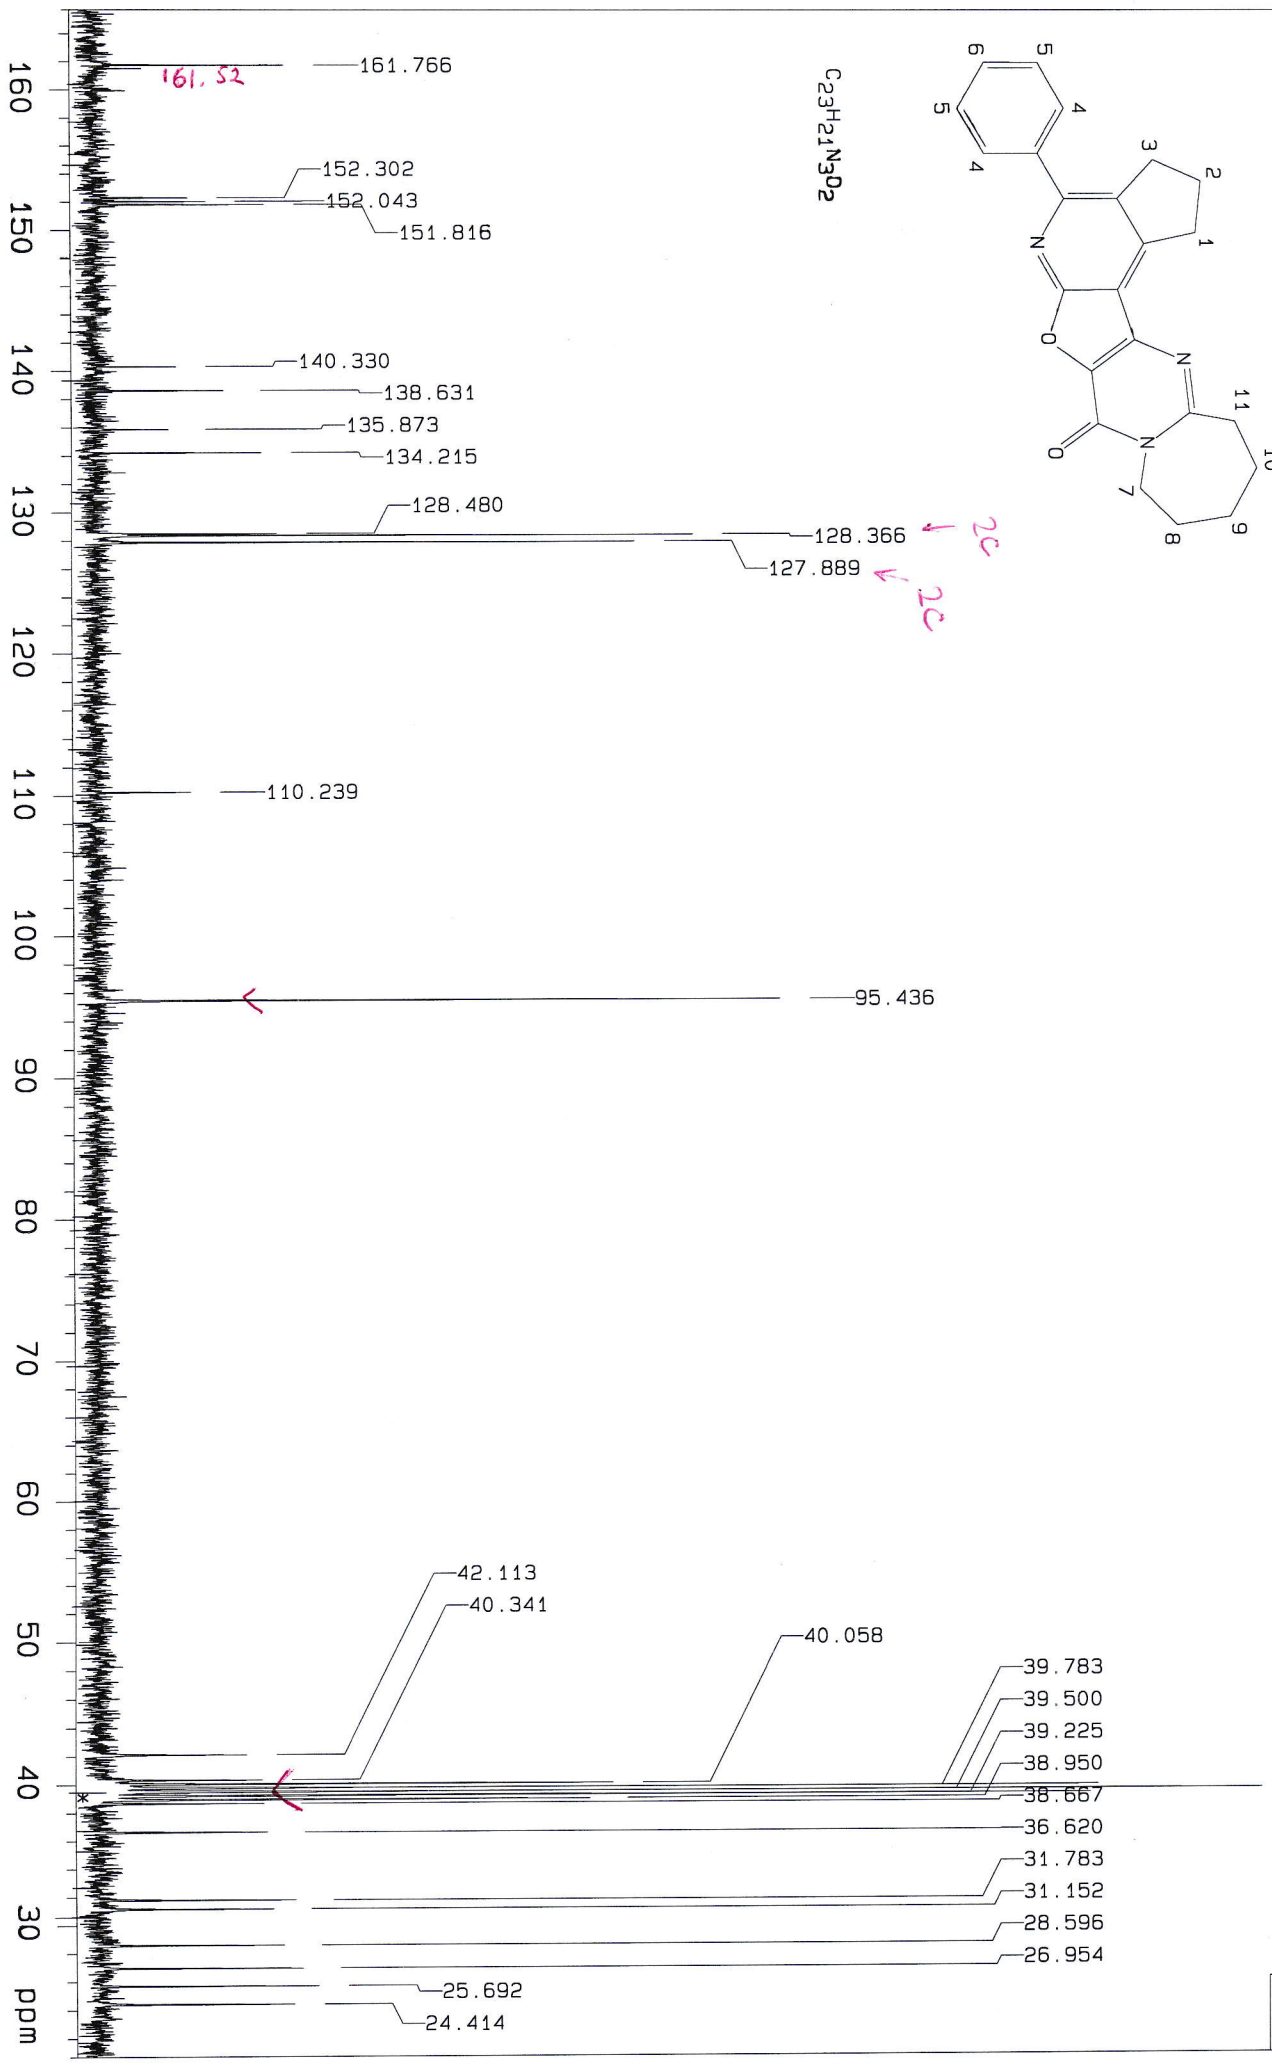

*[Handwritten signature]*

5d

Molecular Structure Research Centre, Yerevan, Armenia, Varian Mercury-300VX

H1 300.077 MHz, nt = 16, np = 16000, temp = 30.0 C, lb = -0.2, solvent = DMSO/Cd4 1/3

SAMV\_12 ha-583

Feb 1 2012

HA-583

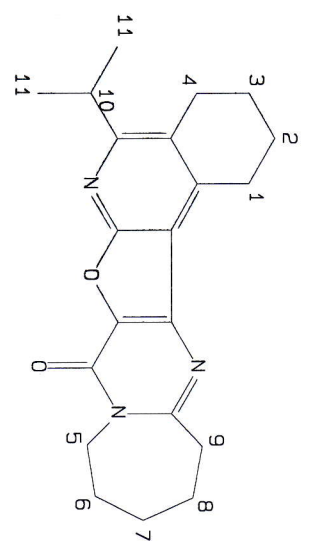

C<sub>21</sub>H<sub>25</sub>N<sub>3</sub>O<sub>2</sub>

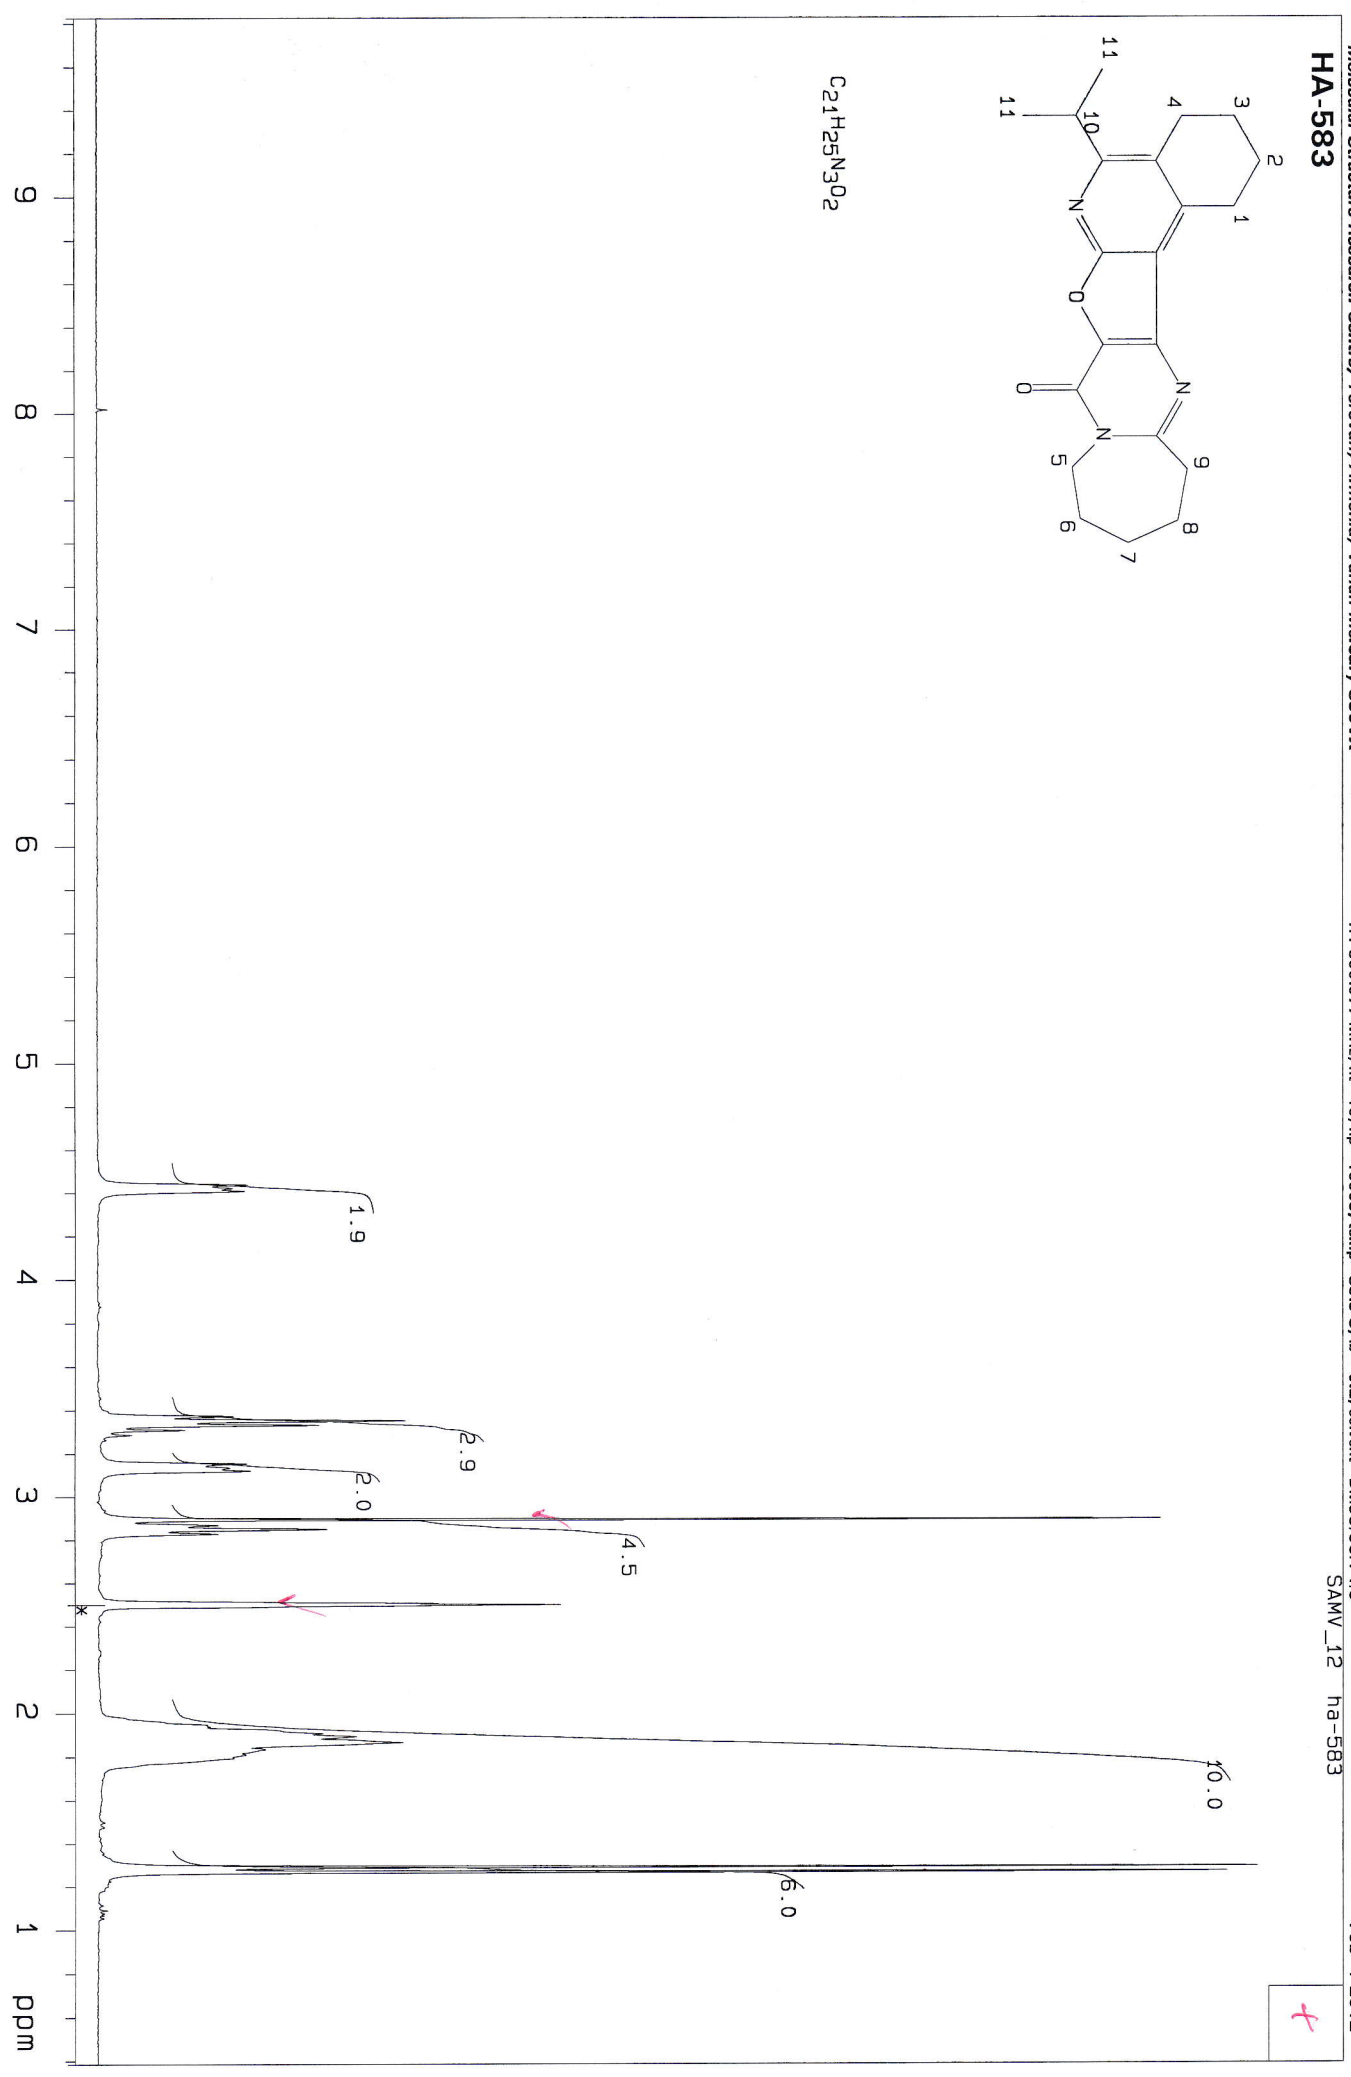

5d

HA-583

Molecular Structure Research Centre, Yerevan, Armenia, Varian Mercury-300VX

C13 75.462 MHz, nt=240, np=19998, temp=30.0 C, lb=1.0, solvent=DMSO/CD4 1/3

SAMV\_12 ha-583

Oct 22 2014

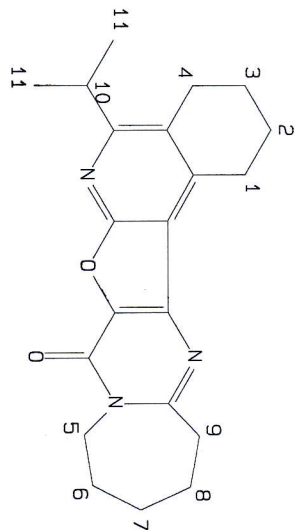

C<sub>21</sub>H<sub>25</sub>N<sub>3</sub>O<sub>2</sub>

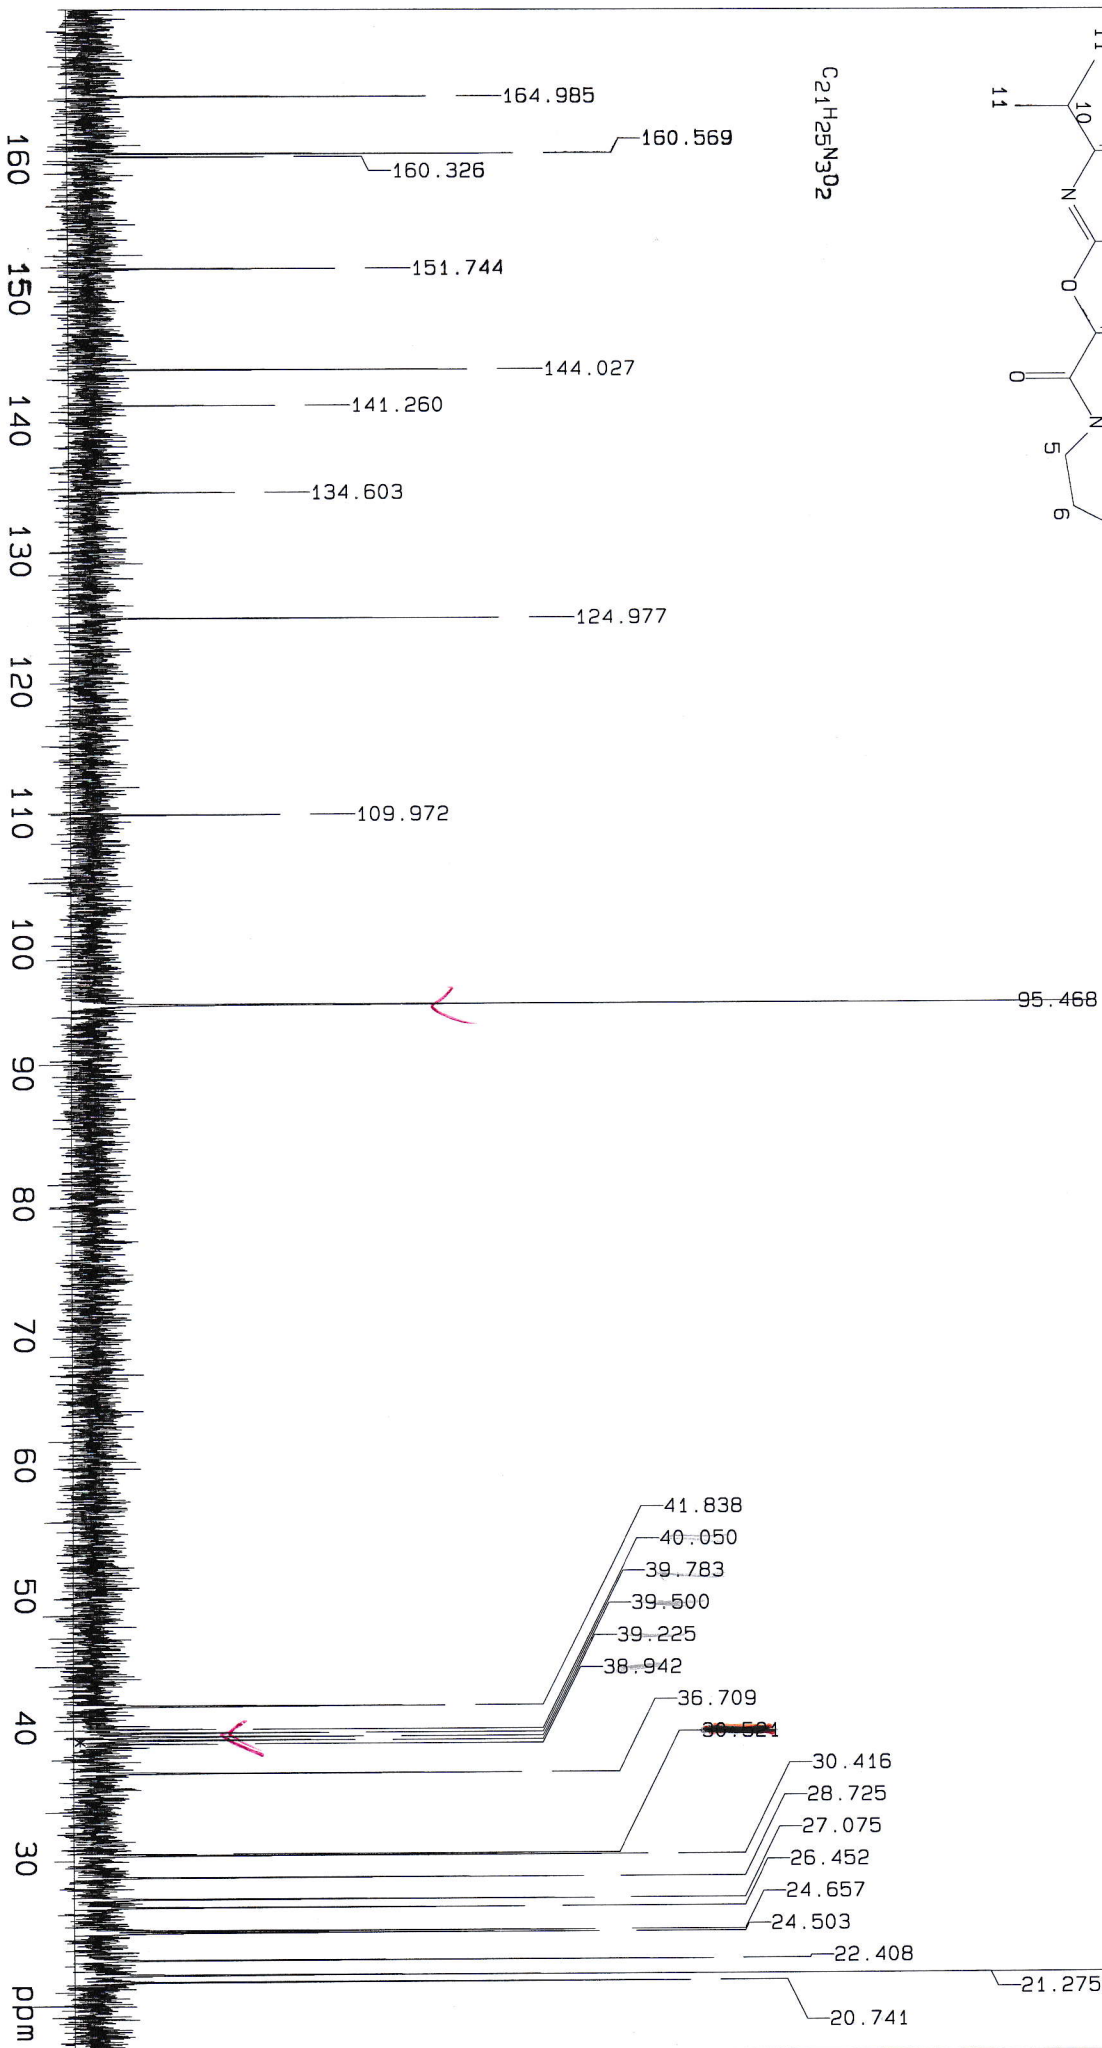

*[Handwritten signature]*

5e

Molecular Structure Research Centre, Yerevan, Armenia, Varian Mercury-300VX

H1 300.077 MHz, nt = 16, np = 16000, temp = 30.0 C, lb = -0.2, solvent = DMSO/Cd4 1/3

Dec 20 2011

HA-547

SAMV\_11 ha-547

4

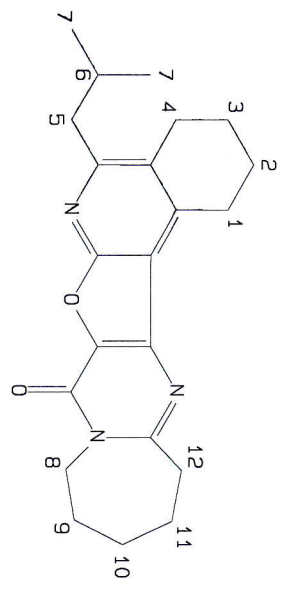

C<sub>22</sub>H<sub>27</sub>N<sub>3</sub>O<sub>2</sub>

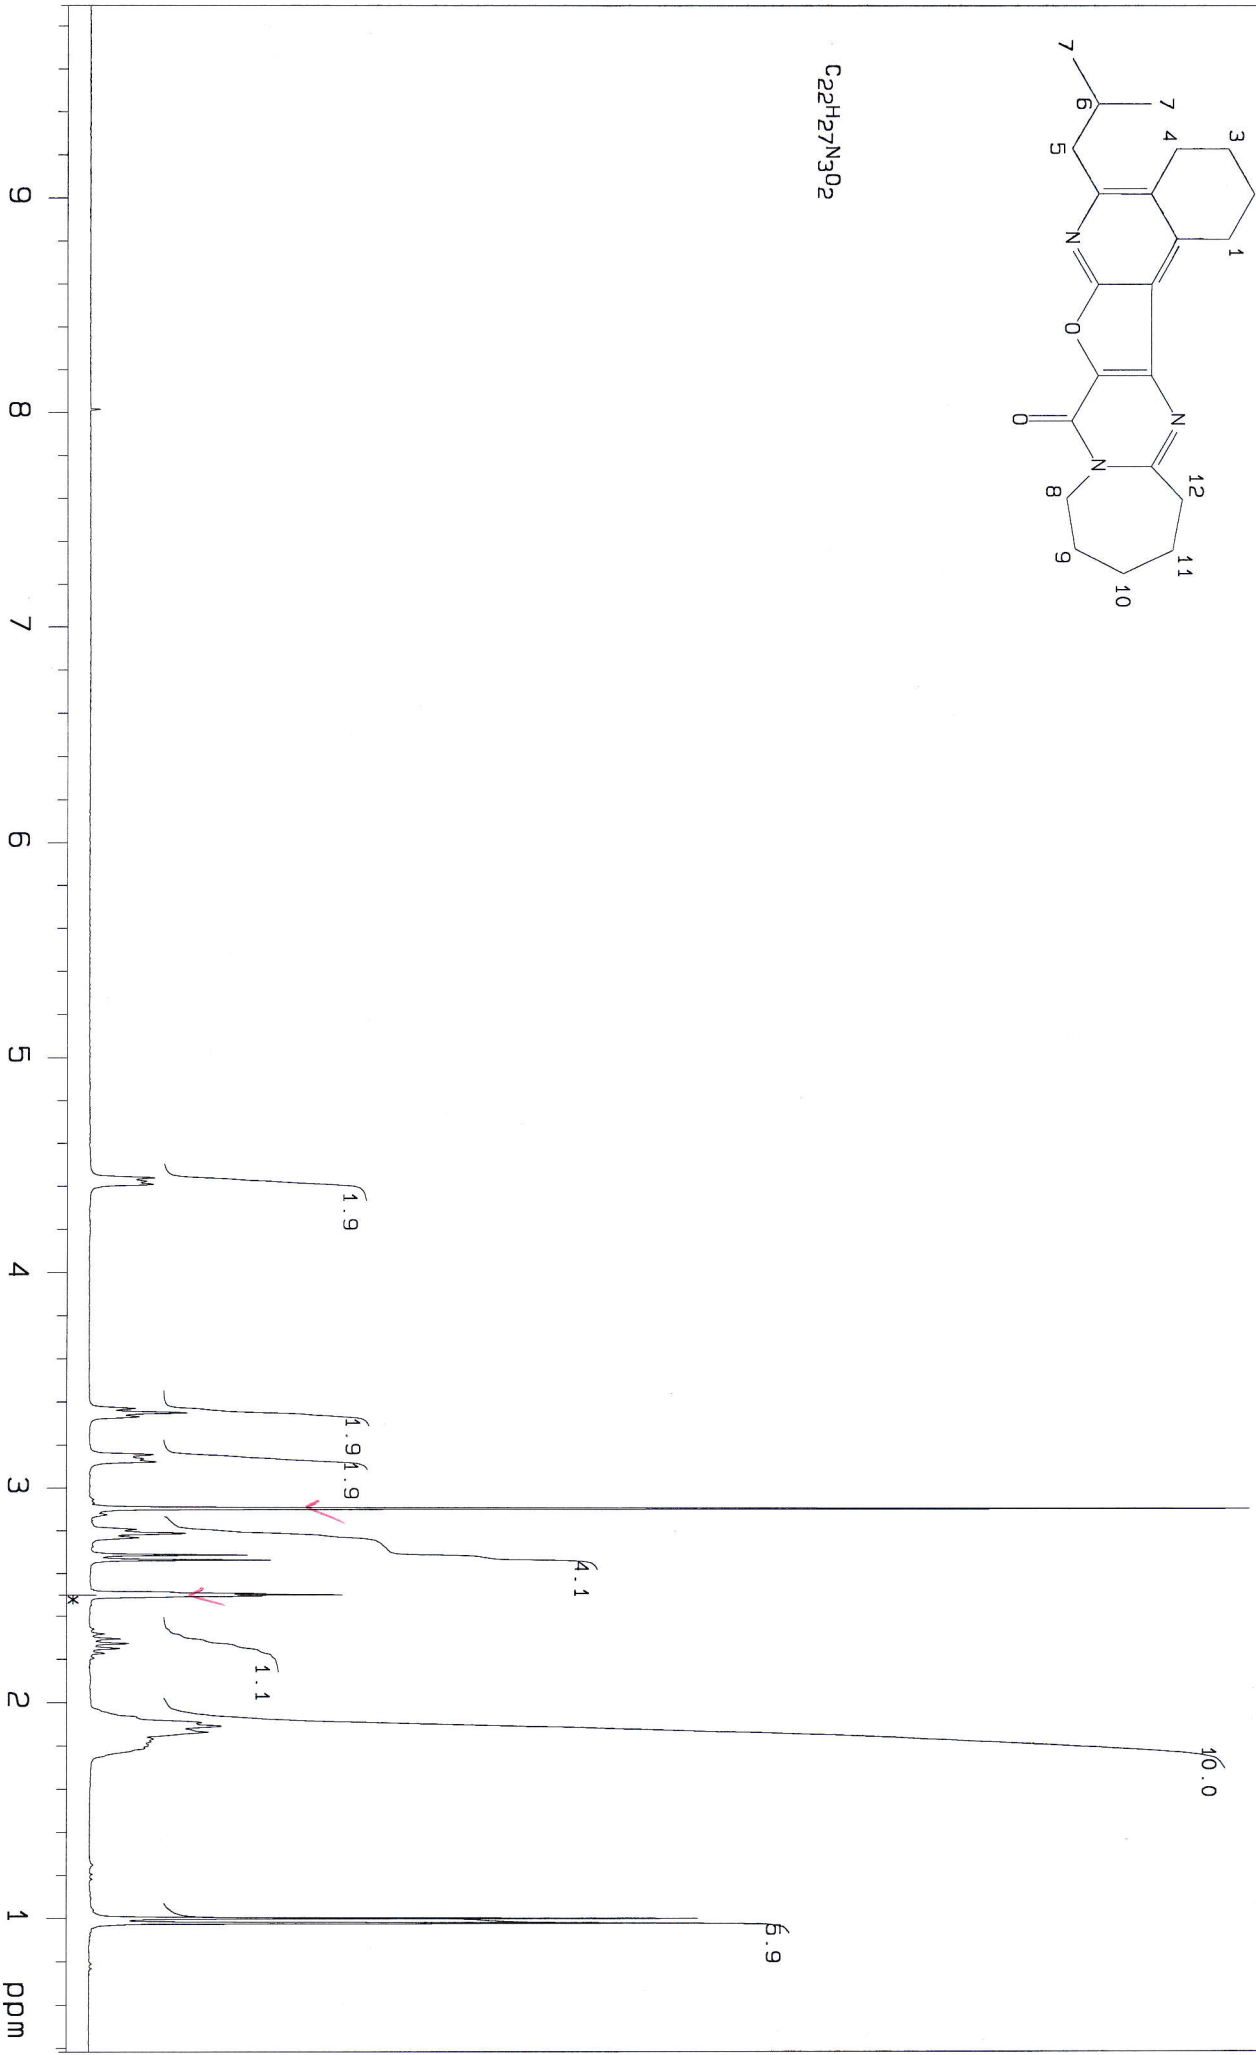



5e

Molecular Structure Research Centre, Yerevan, Armenia, Varian Mercury-300VX

C13 75.462 MHz, nt=256, np=19998, temp=30.0 C, lb=1.0, solvent=DMSO/C14 1/3

HA-547

SAMV\_14 na-547

Oct 22 2014

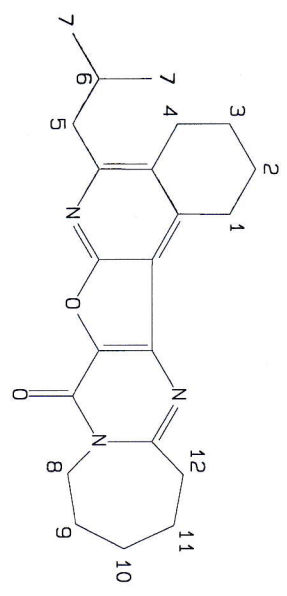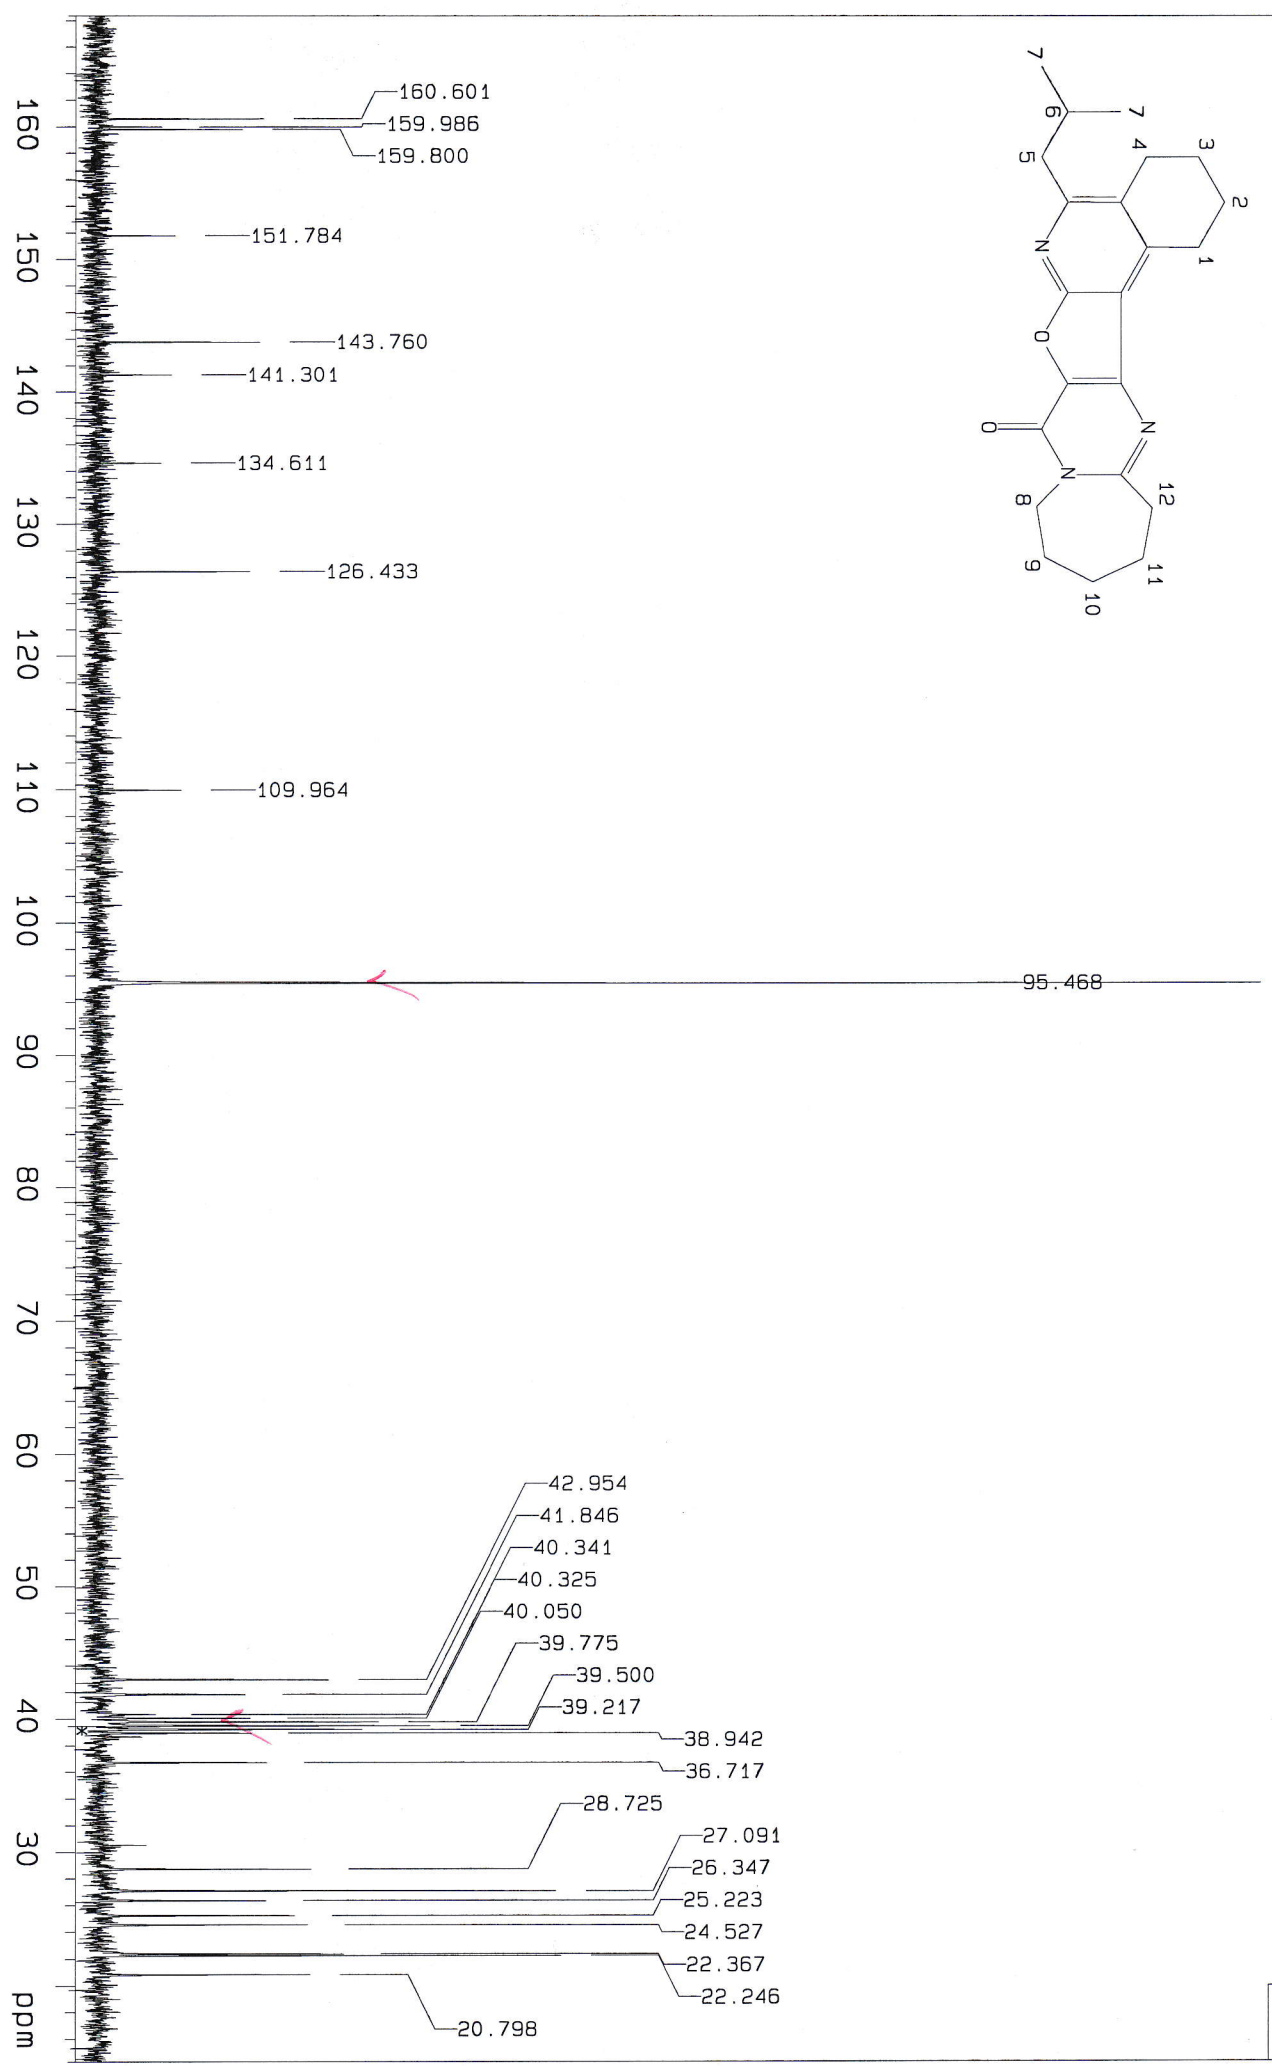

P

5f

*Handwritten signature*

Molecular Structure Research Centre, Yerevan, Armenia, Varian Mercury-300VX

H1 300.077 MHz, nt = 16, np = 16000, temp = 30.0 C, lb = -0.2, solvent = DMSO/CDCl4 1/3

Feb 8 2012

HA-587

SAMV\_12 ha-587

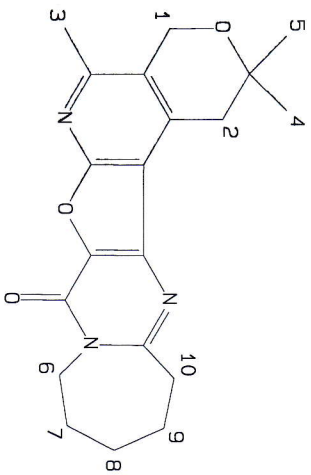

C<sub>20</sub>H<sub>23</sub>N<sub>3</sub>O<sub>3</sub>

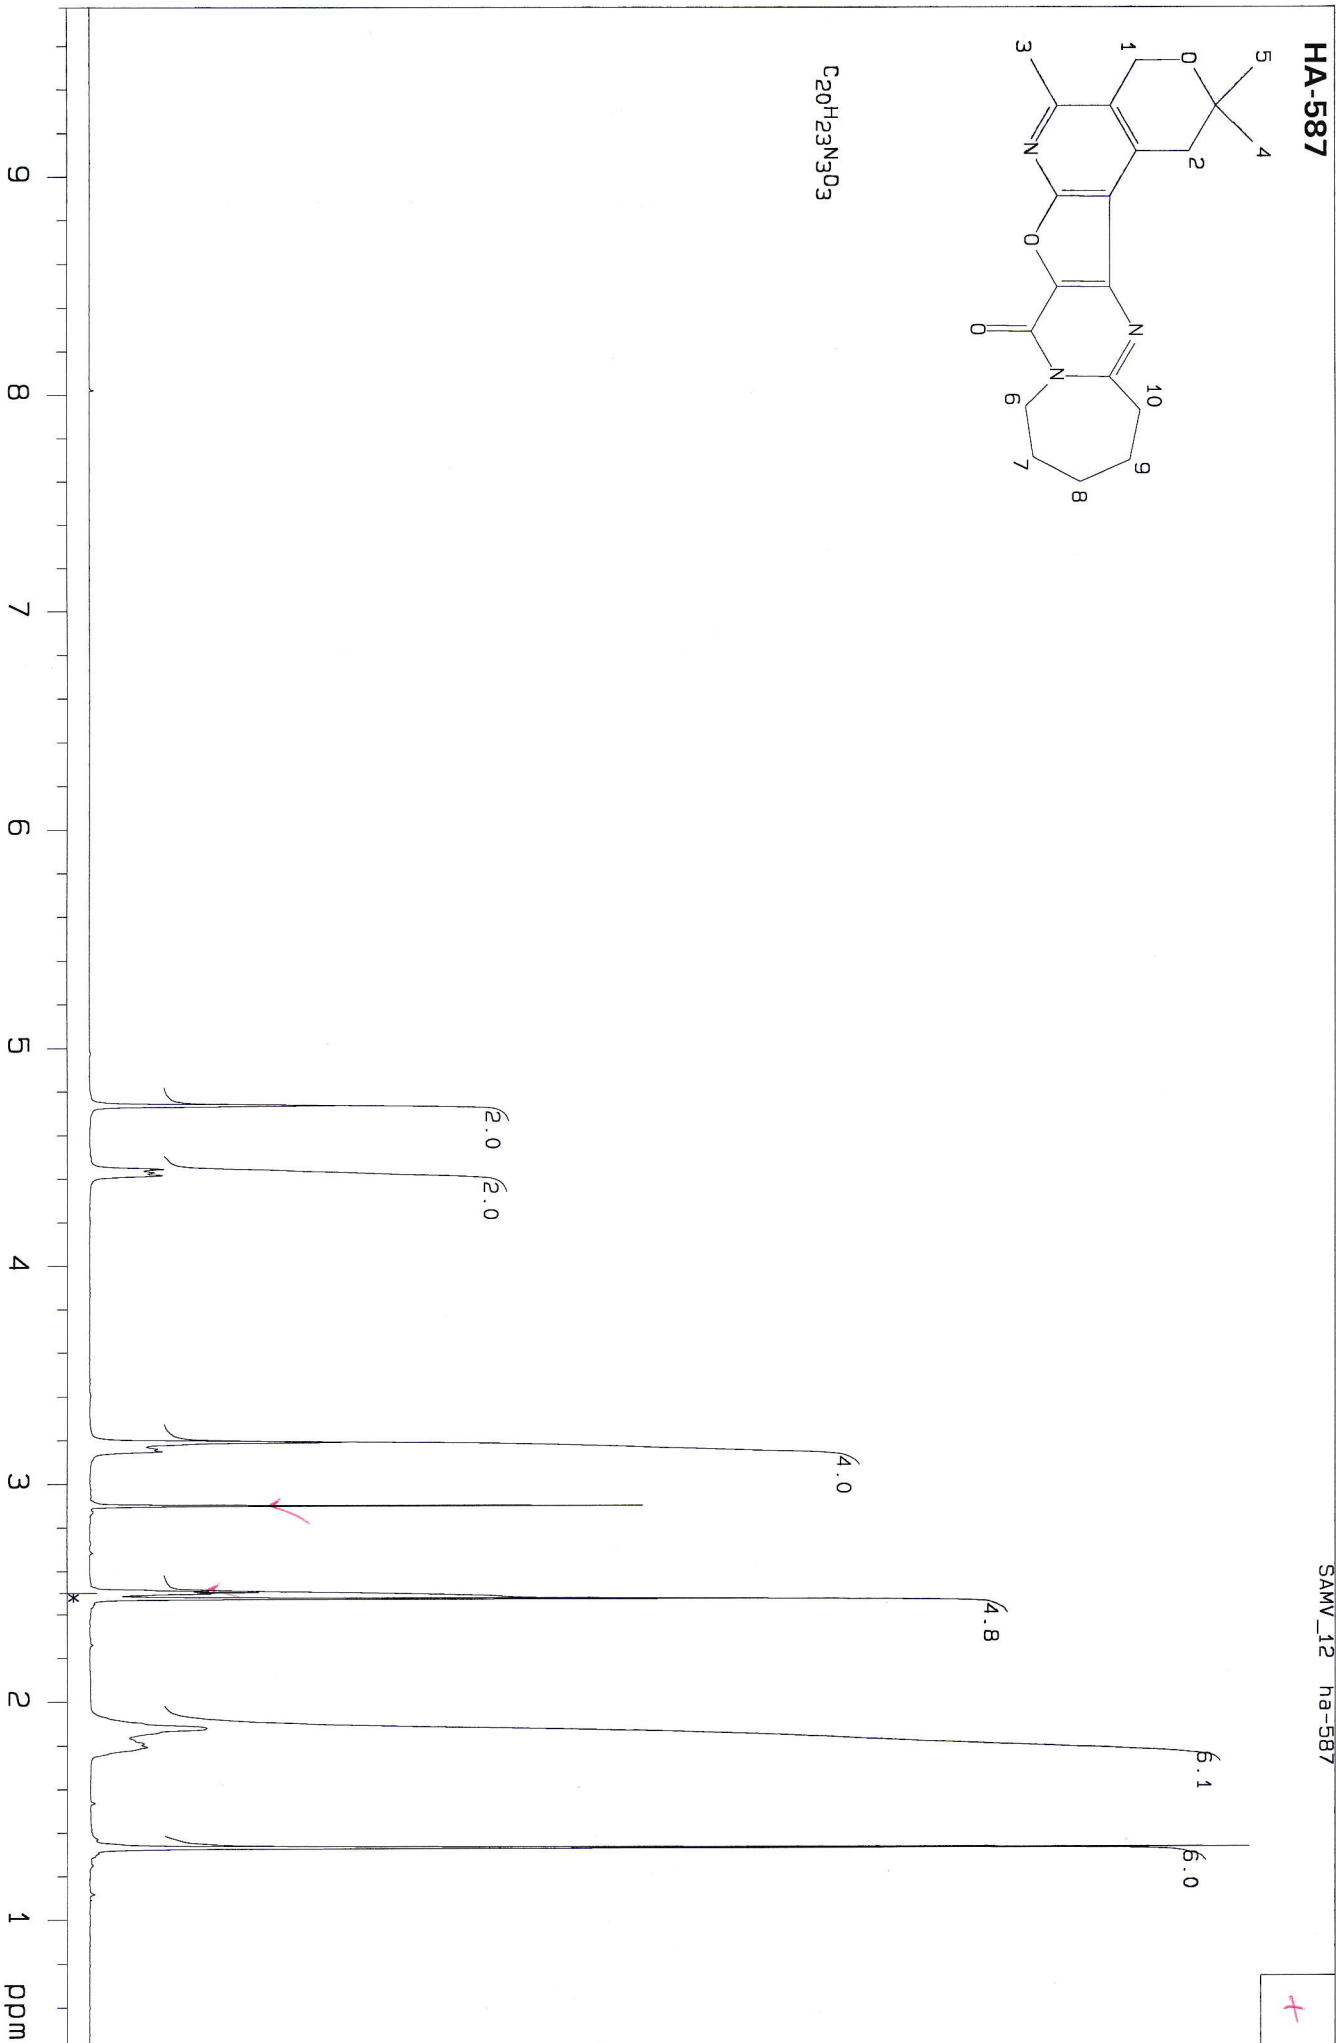

+



5f

HA-587

Molecular Structure Research Centre, Yerevan, Armenia, Varian Mercury-300VX

C13 75.462 MHz, nt = 480, np = 19998, temp = 30.0 C, lb = 1.0, solvent = DMSO/CDCl4 1/3

SAMV\_12 ha-587

Oct 22 2014

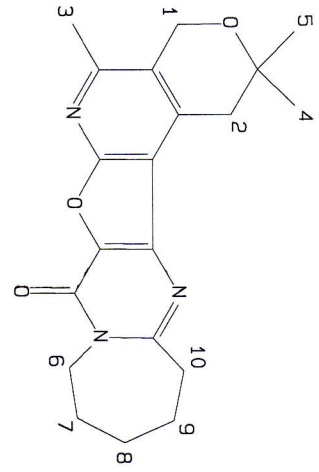

C<sub>20</sub>H<sub>23</sub>N<sub>3</sub>O<sub>3</sub>

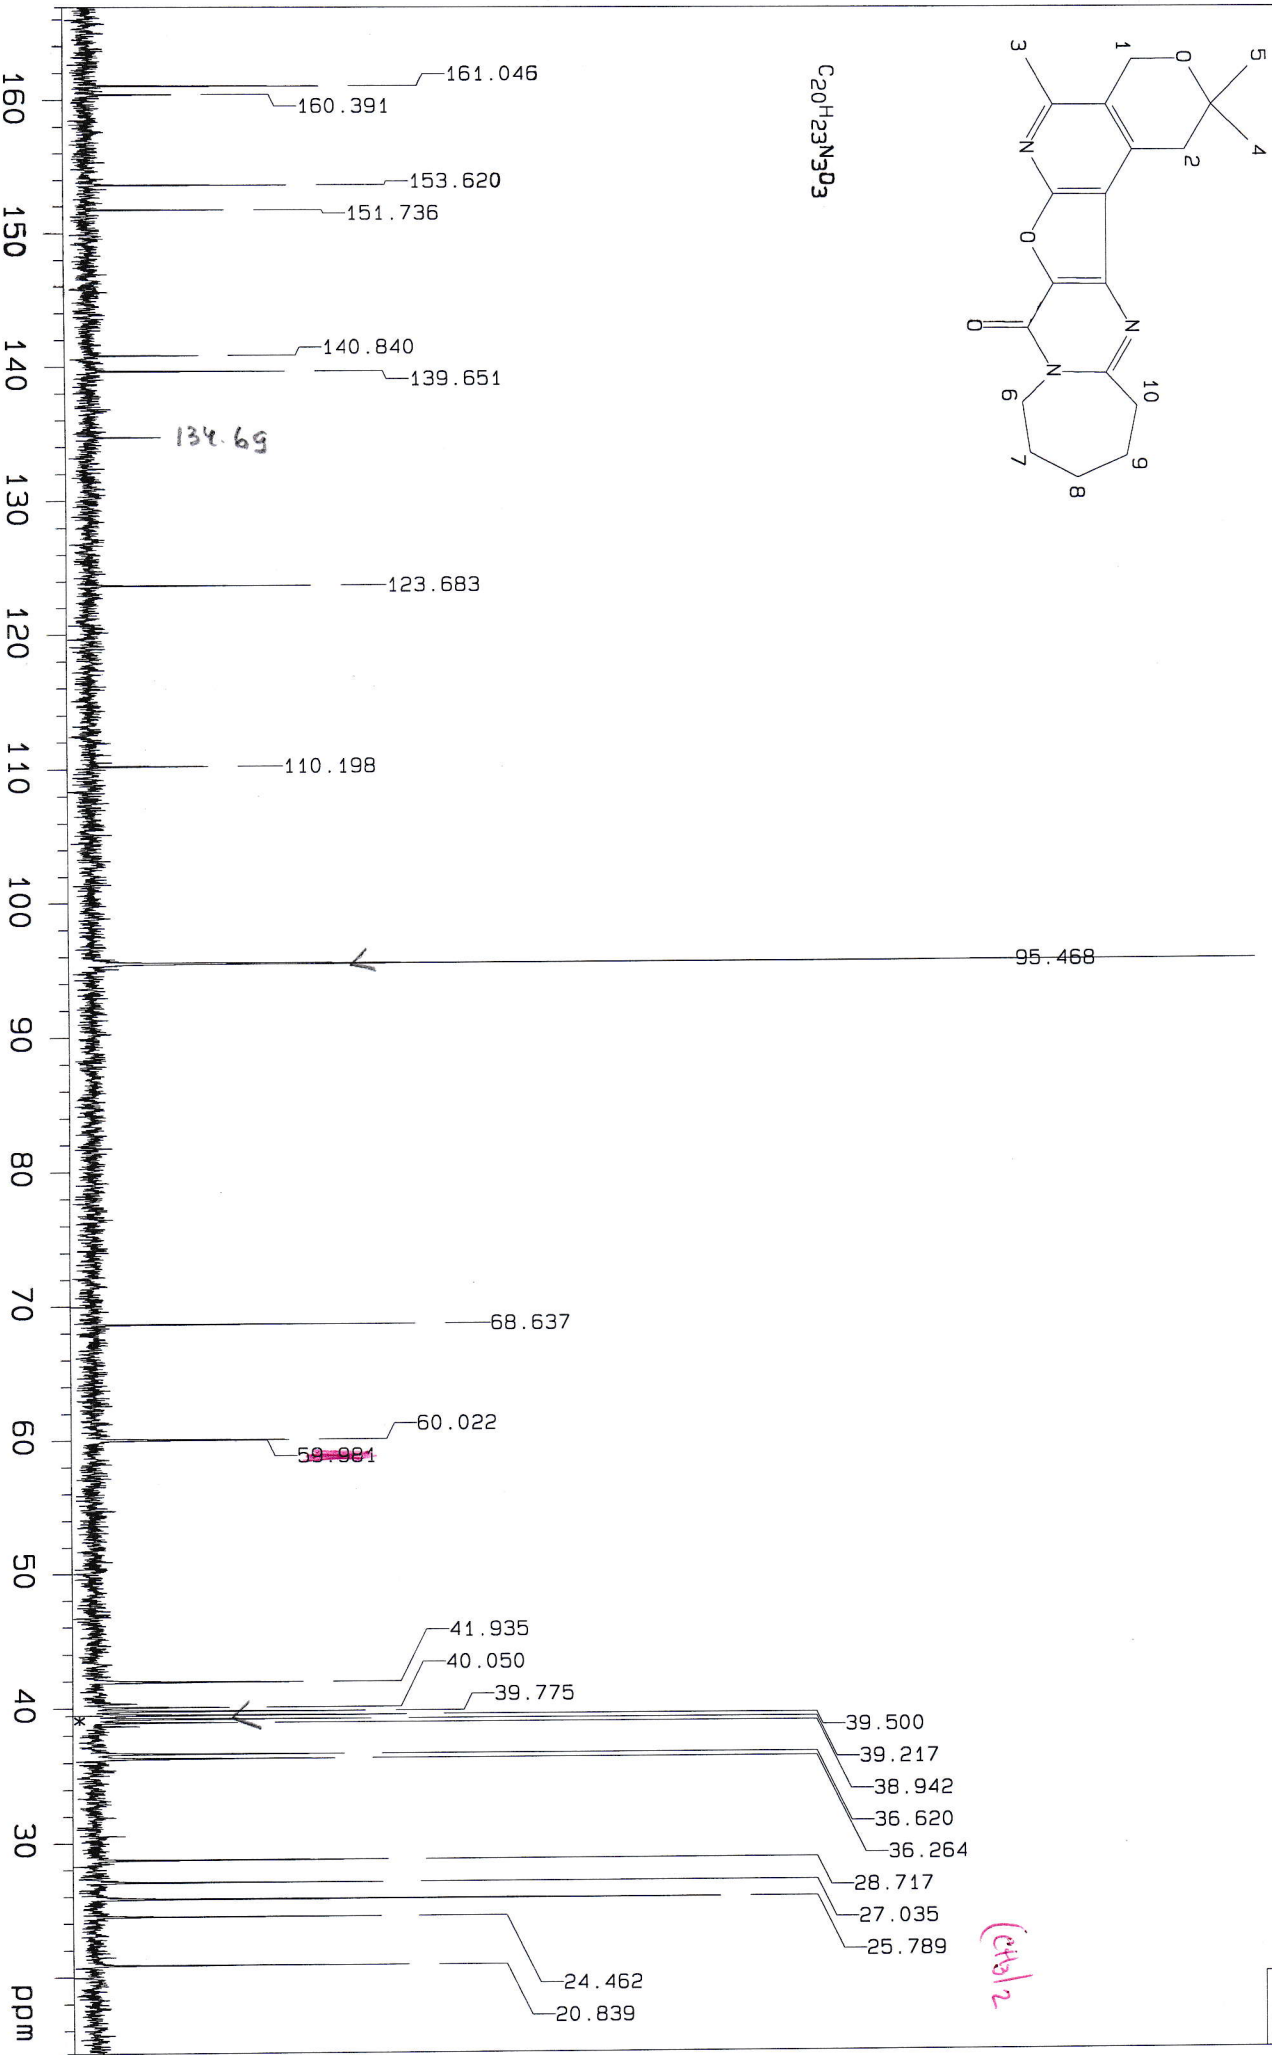

(CH<sub>2</sub>)<sub>2</sub>

+

*Handwritten signature*

59

Molecular Structure Research Centre, Yerevan, Armenia, Varian Mercury-300VX

H1 300.077 MHz, nt = 16, mp = 16000, temp = 30.0 C, lb = -0.2, solvent = DMSO/Cd4 1/3

SAMV\_11 na-538

Dec 9 2011

HA-538

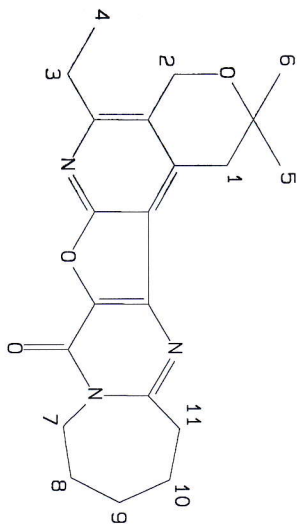

C<sub>21</sub>H<sub>25</sub>N<sub>3</sub>O<sub>3</sub>

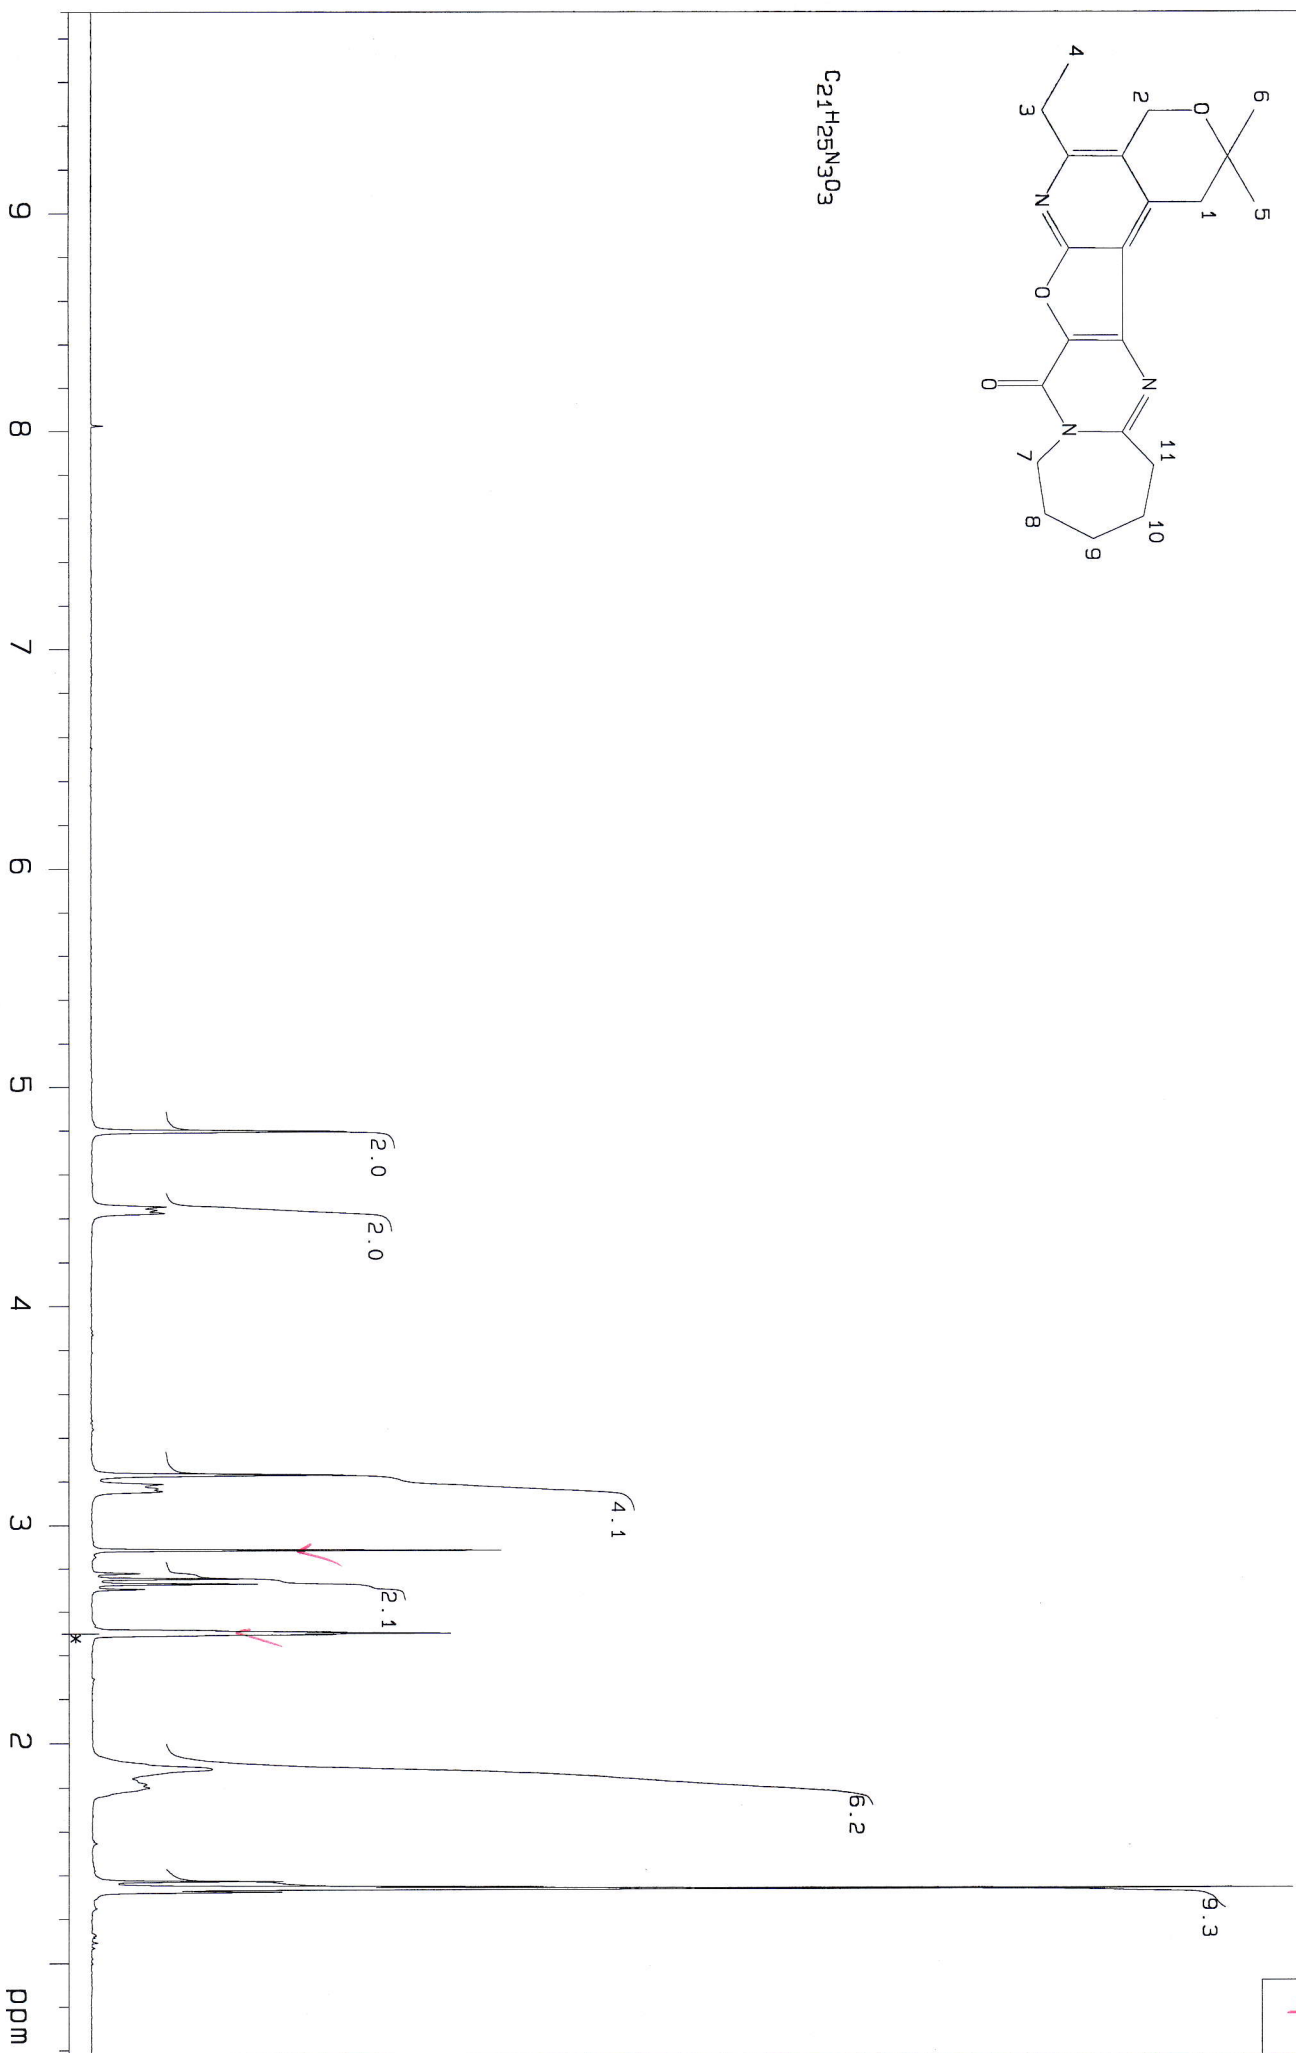

5g

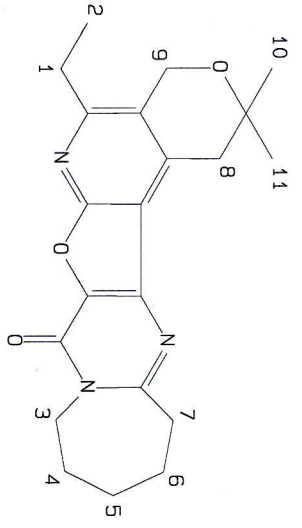

*CH<sub>2</sub>N<sub>3</sub>O<sub>3</sub>*

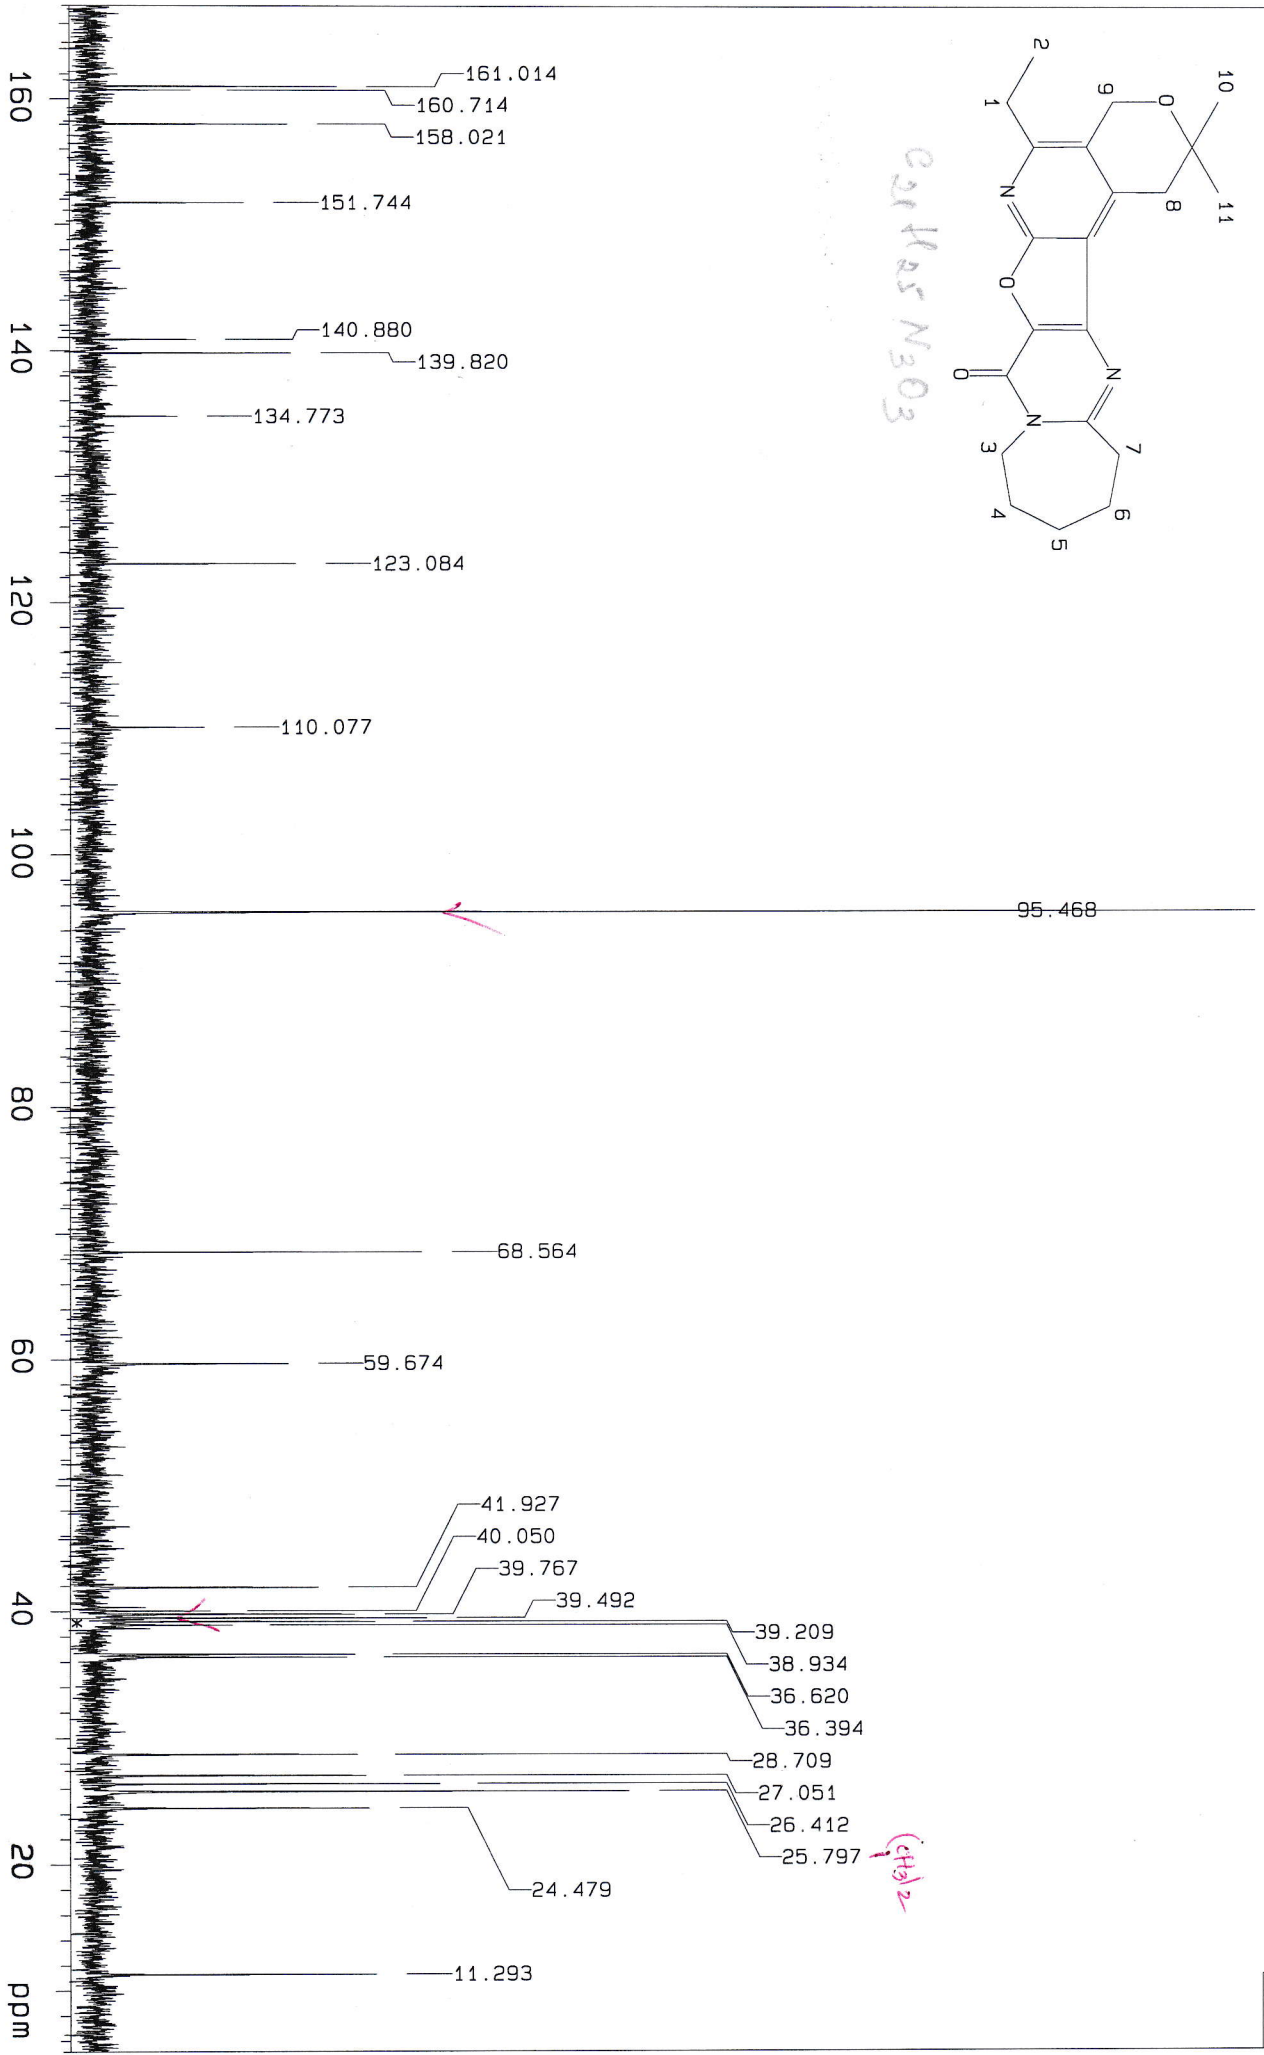

*(CH<sub>2</sub>)<sub>2</sub>*

+

*[Handwritten signature]*

5h

Molecular Structure Research Centre, Yerevan, Armenia, Varian Mercury-300VX

H1 300.077 MHz, nt = 16, np = 16000, temp = 30.0 C, lb = -0.2, solvent = DMSO/CD4 T13

SAMV\_111 ha-542

Dec 13 2011

HA-542

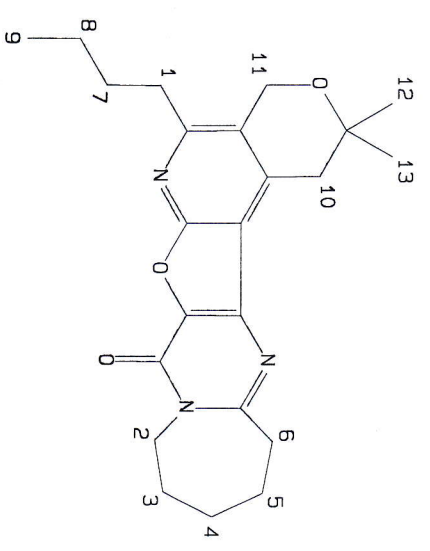

C<sub>23</sub>H<sub>29</sub>N<sub>3</sub>O<sub>3</sub>

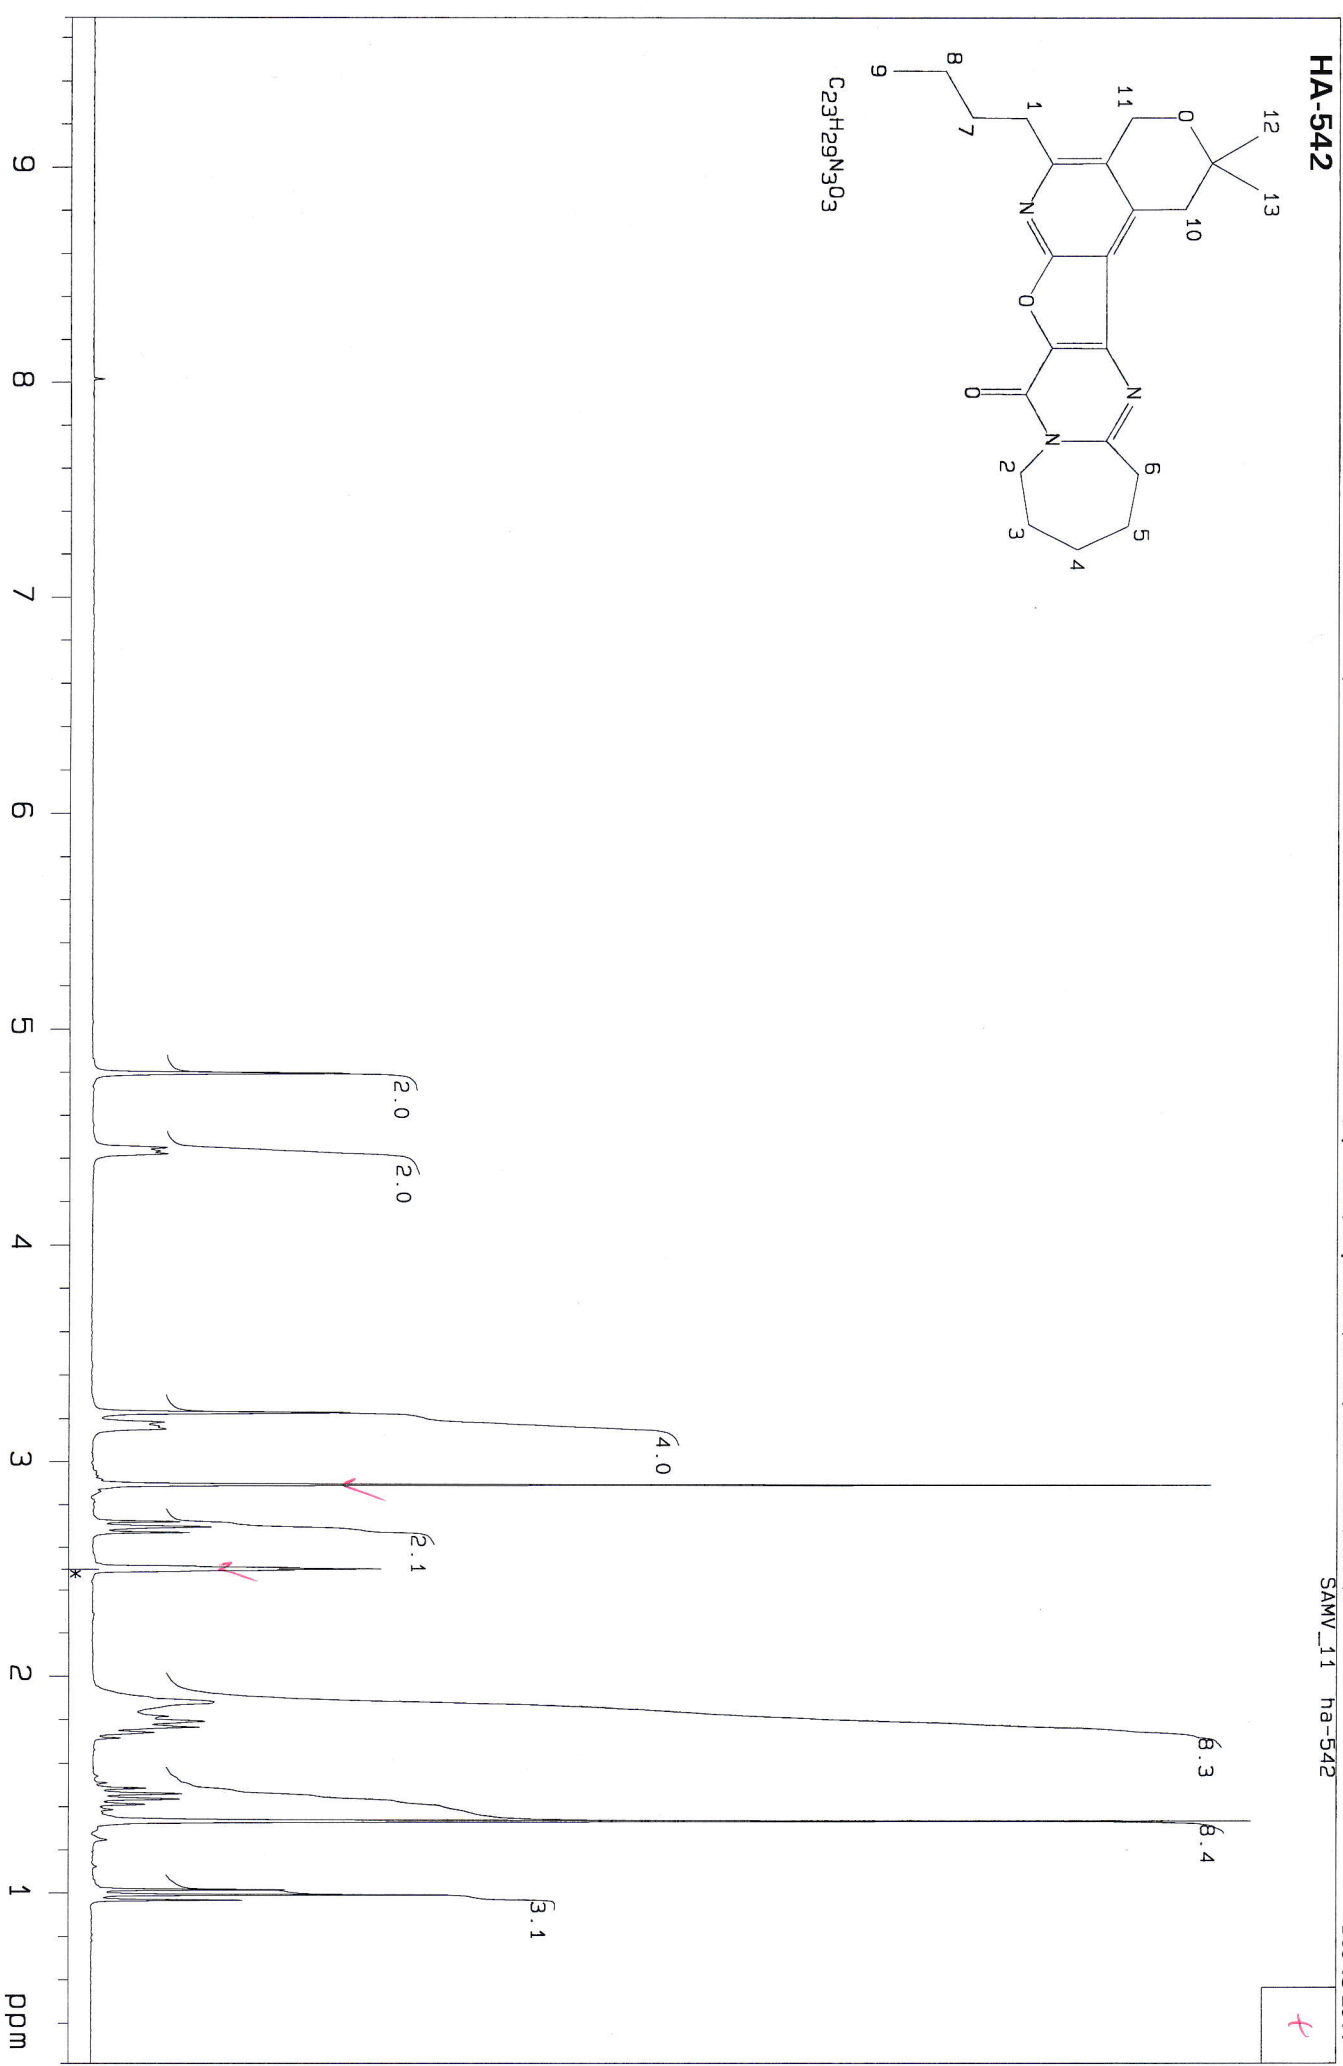

5h

HA-542  
Molecular Structure Research Centre, Yerevan, Armenia, Varian Mercury-300VX

13C 75.462 MHz, nt=656, np=19998, temp=30.0 C, lb=1.0, solvent=DMSO/C4 13  
SAMV\_14 ha-542

Oct 21 2014

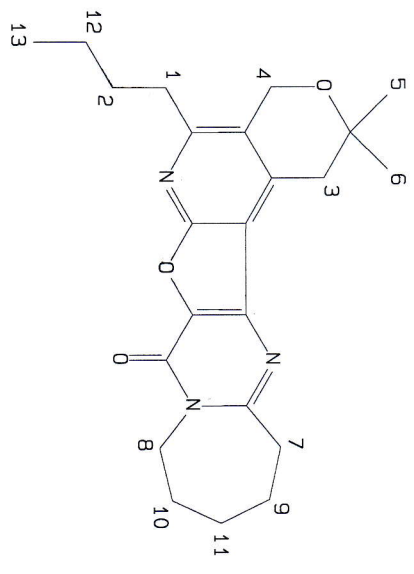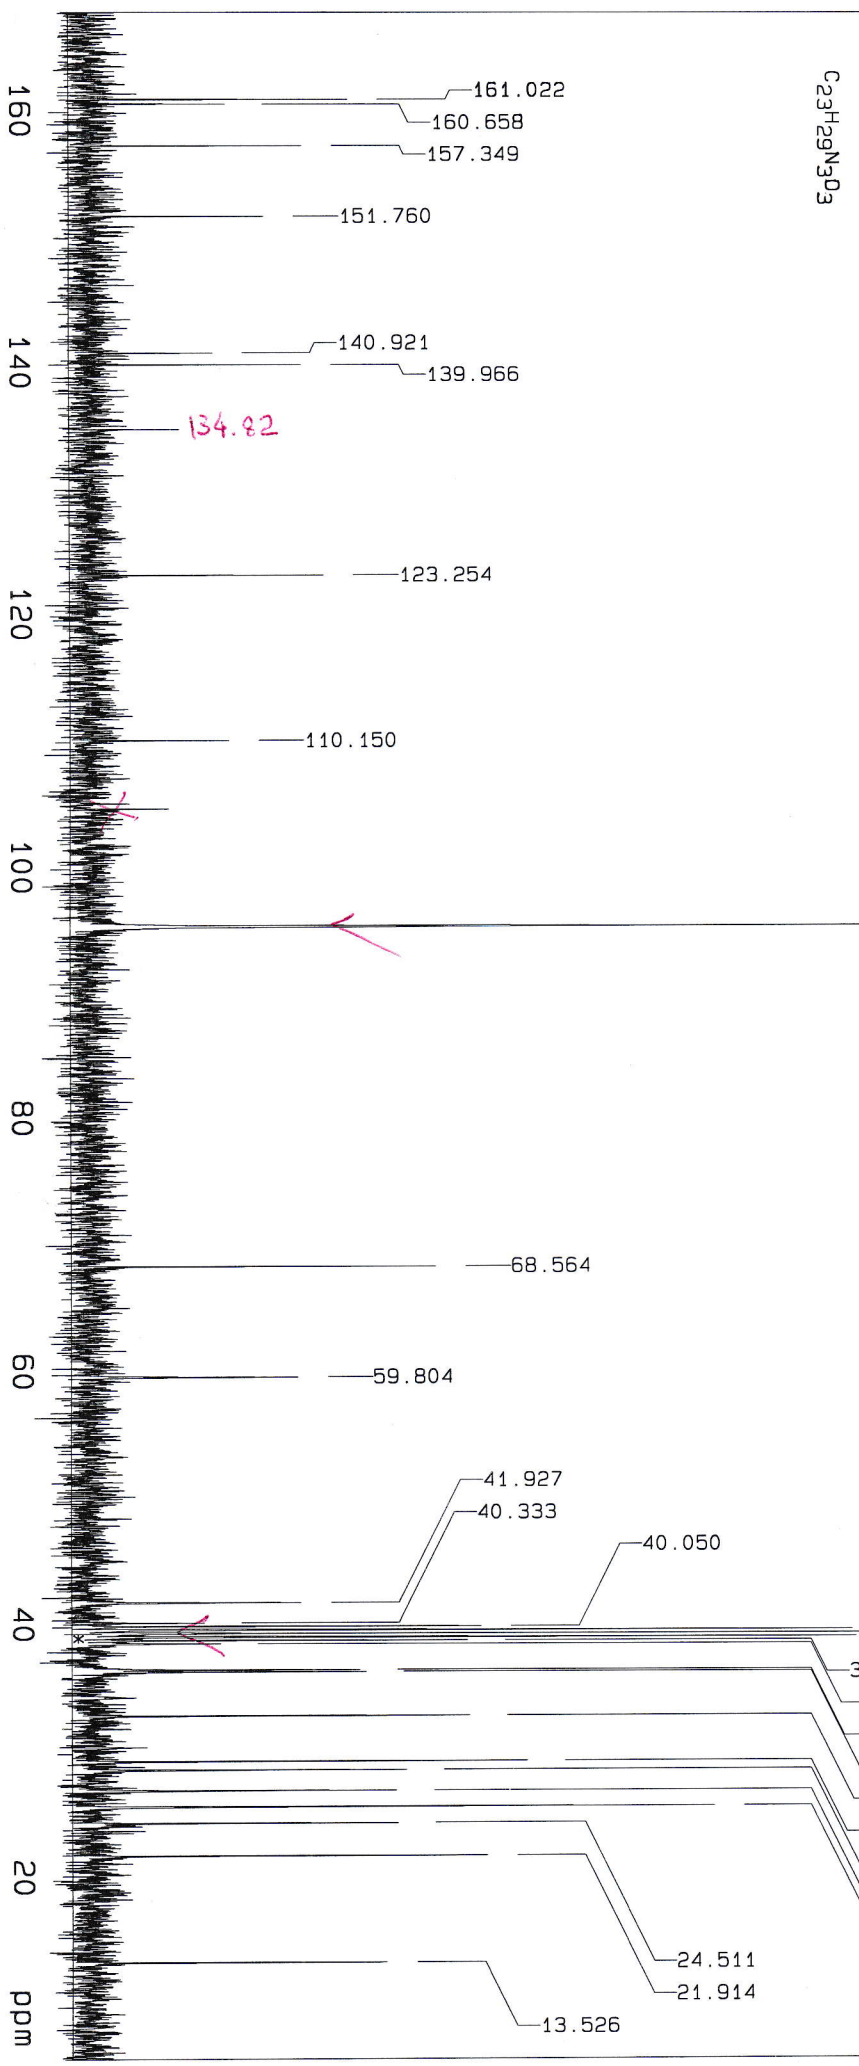

*[Handwritten signature]*
